# Supplementary material
Source: PubMed Central journal article supplement (PMC9205334)

## Supporting Information

### **Lewis Acid-Catalyzed Halonium Generation for Morpholine Synthesis and Claisen Rearrangement**

Jeewani P. Ariyaratna, Nur-E Alom, Leo P. Roberts, Navdeep Kaur, Fan Wu, and Wei  
Li\*

*Department of Chemistry and Biochemistry, School of Green Chemistry and  
Engineering, The University of Toledo, 2801 West Bancroft Street, Toledo, Ohio  
43606, United States*

E-mail: [Wei.Li@UToledo.edu](mailto:Wei.Li@UToledo.edu)

## Content

|                       |        |
|-----------------------|--------|
| 1. Spectral Data..... | S3-S50 |
|-----------------------|--------|

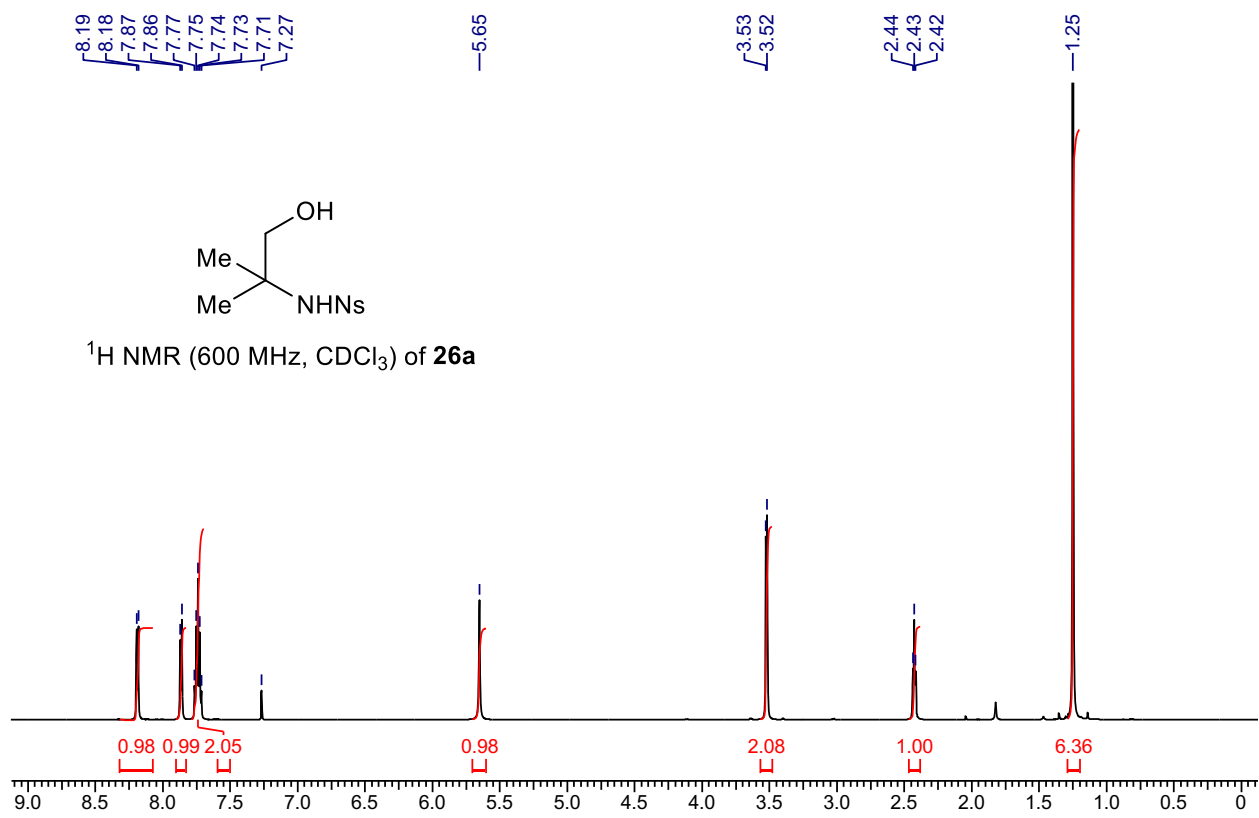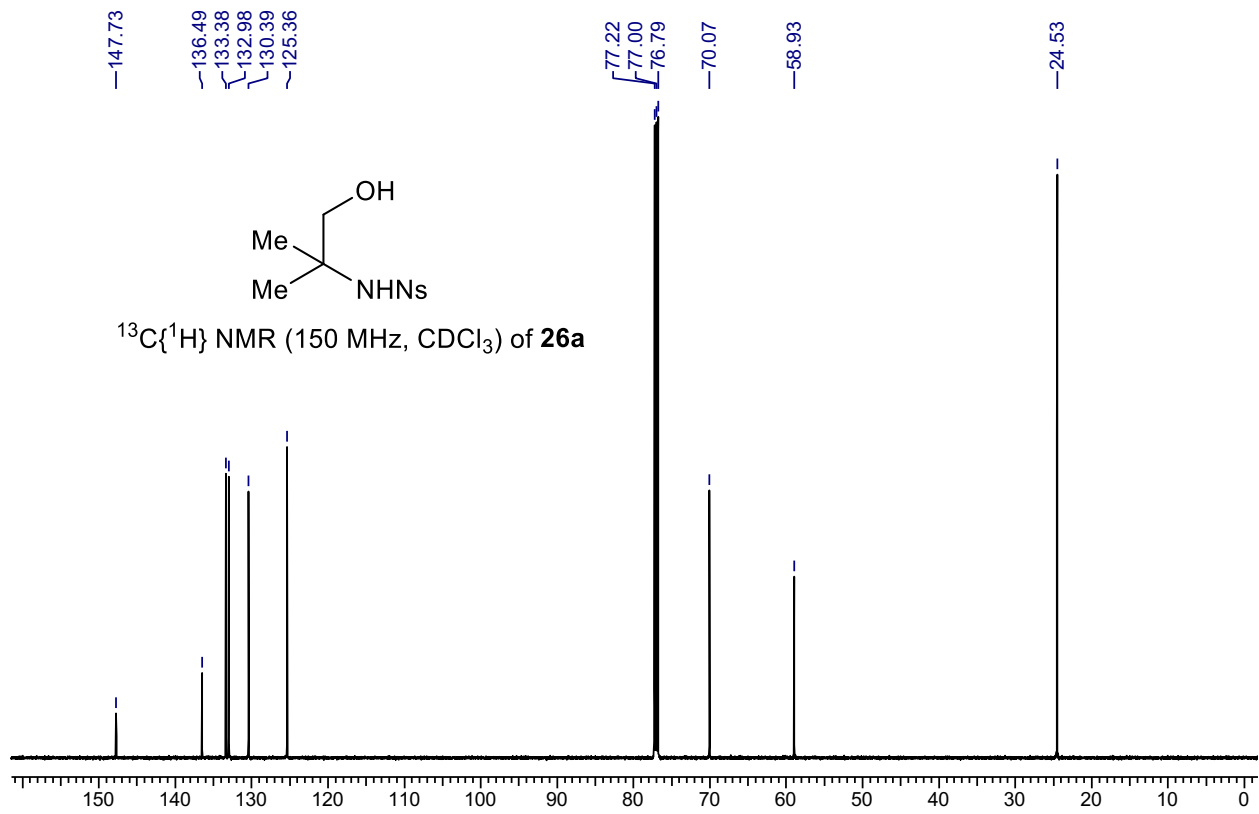

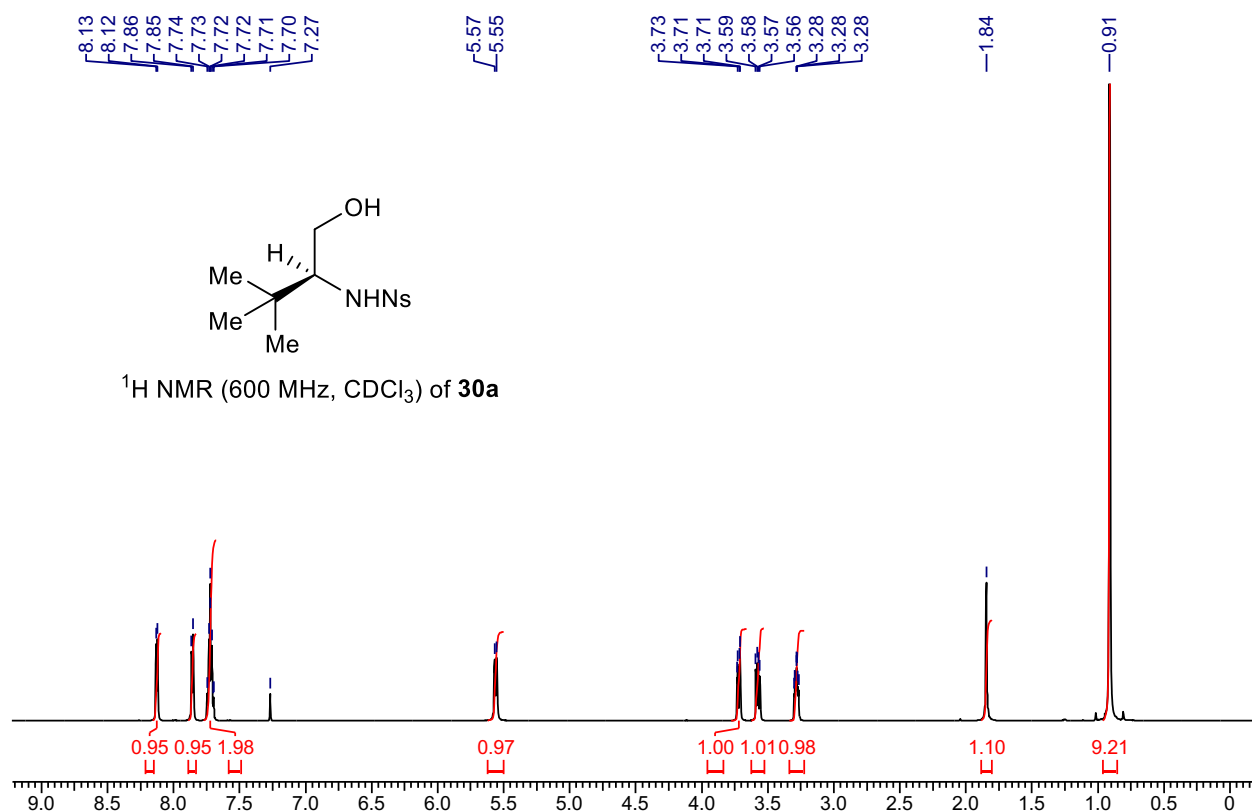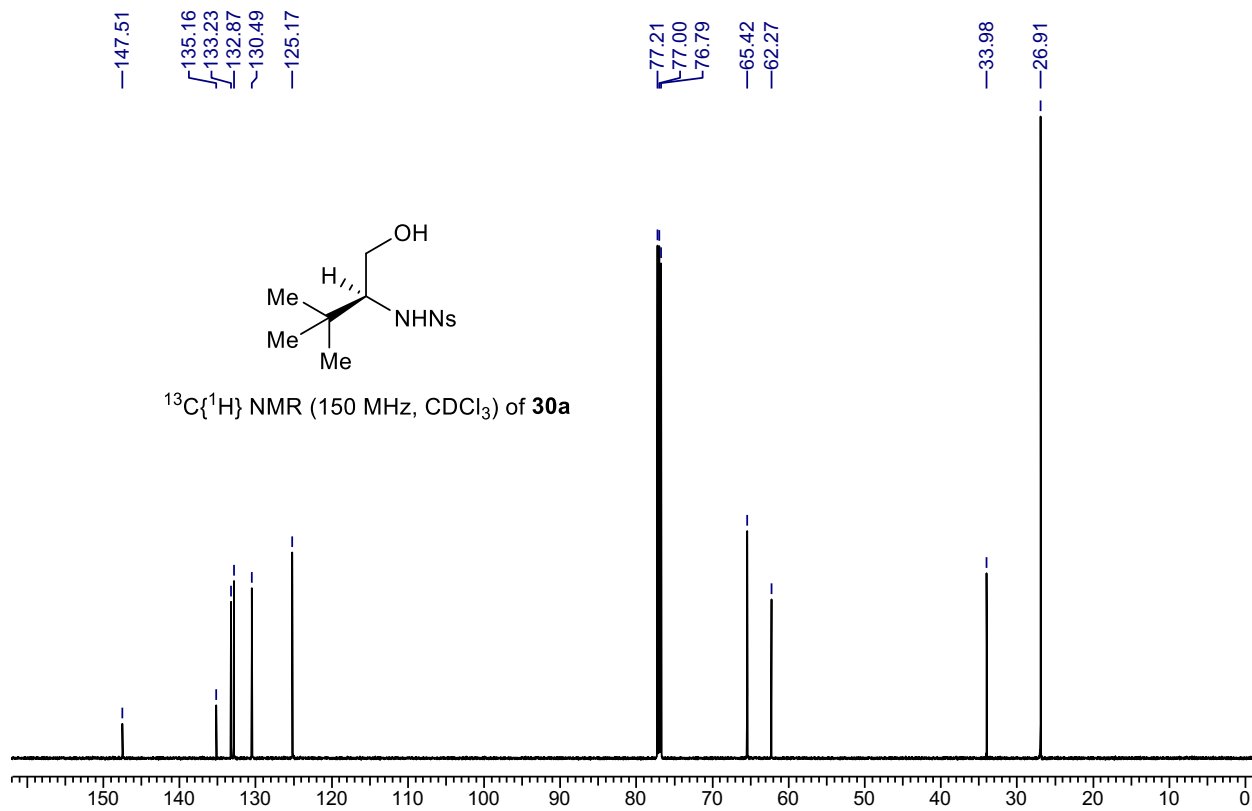

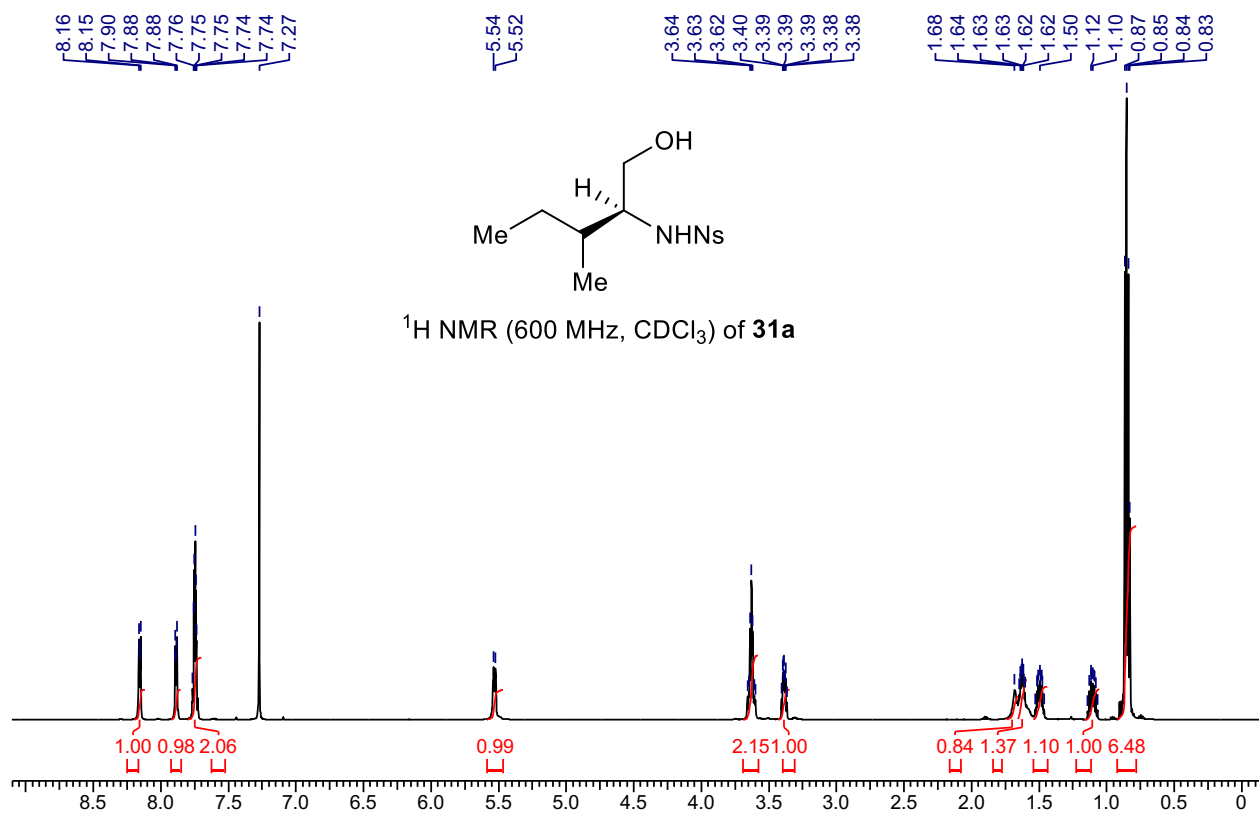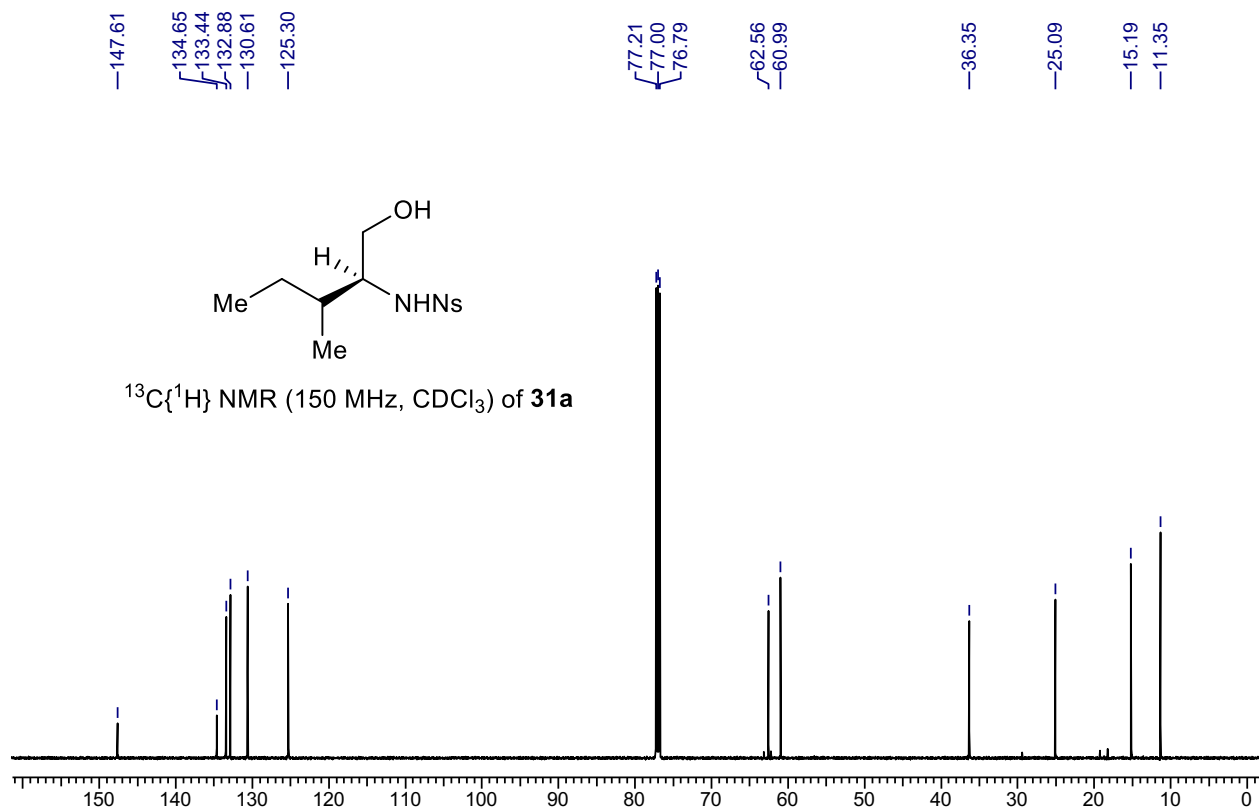

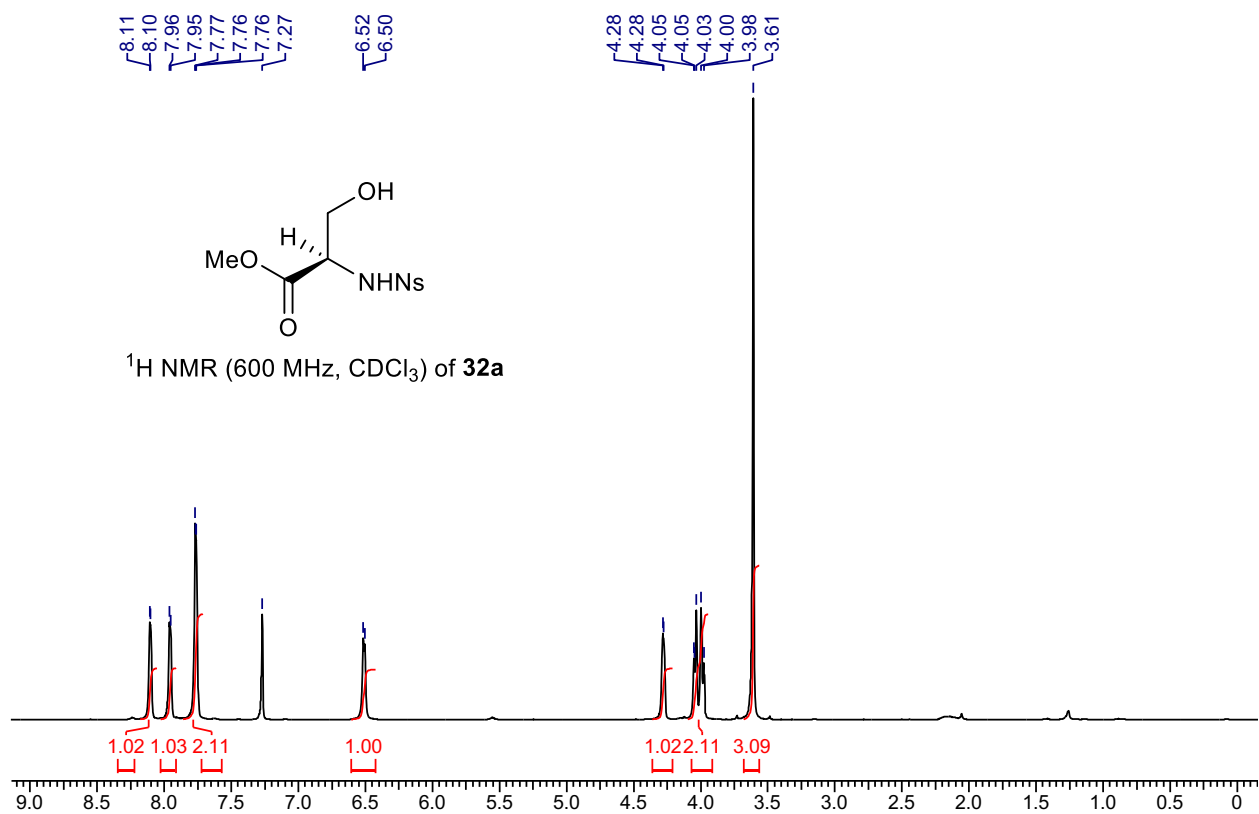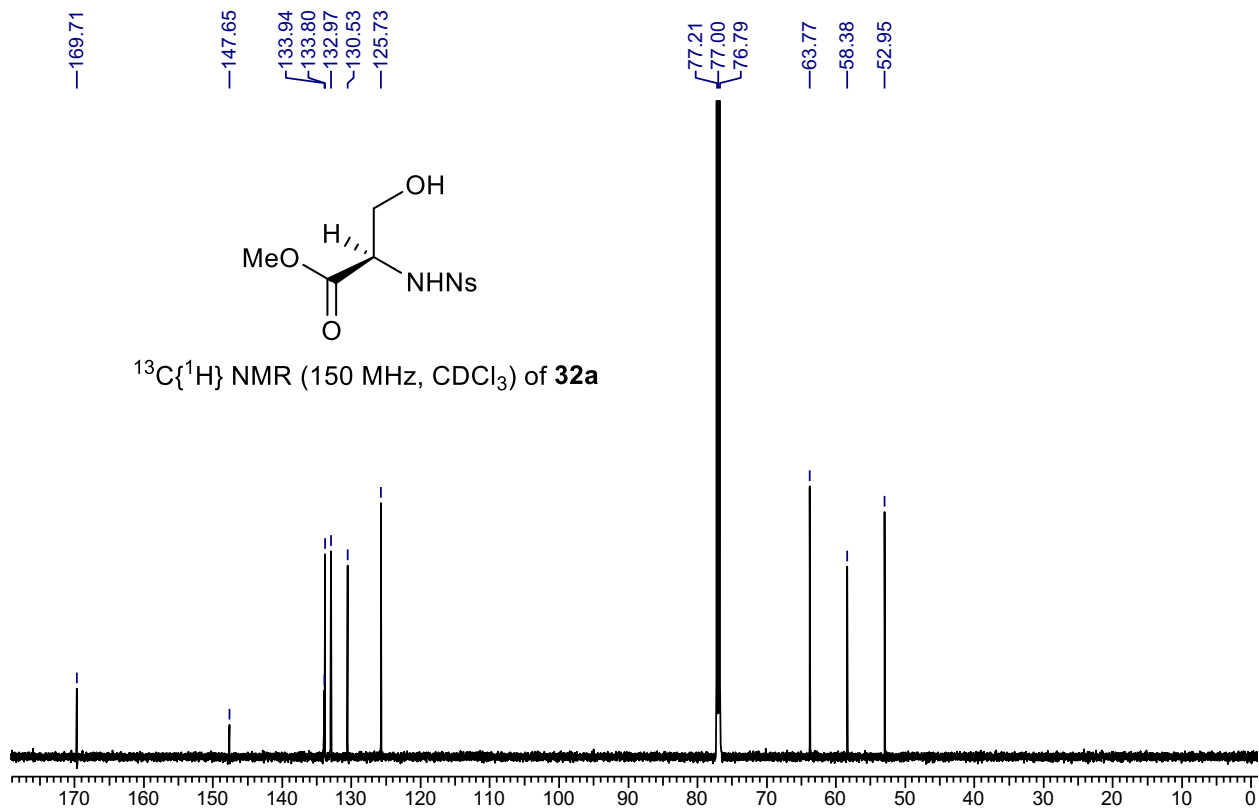

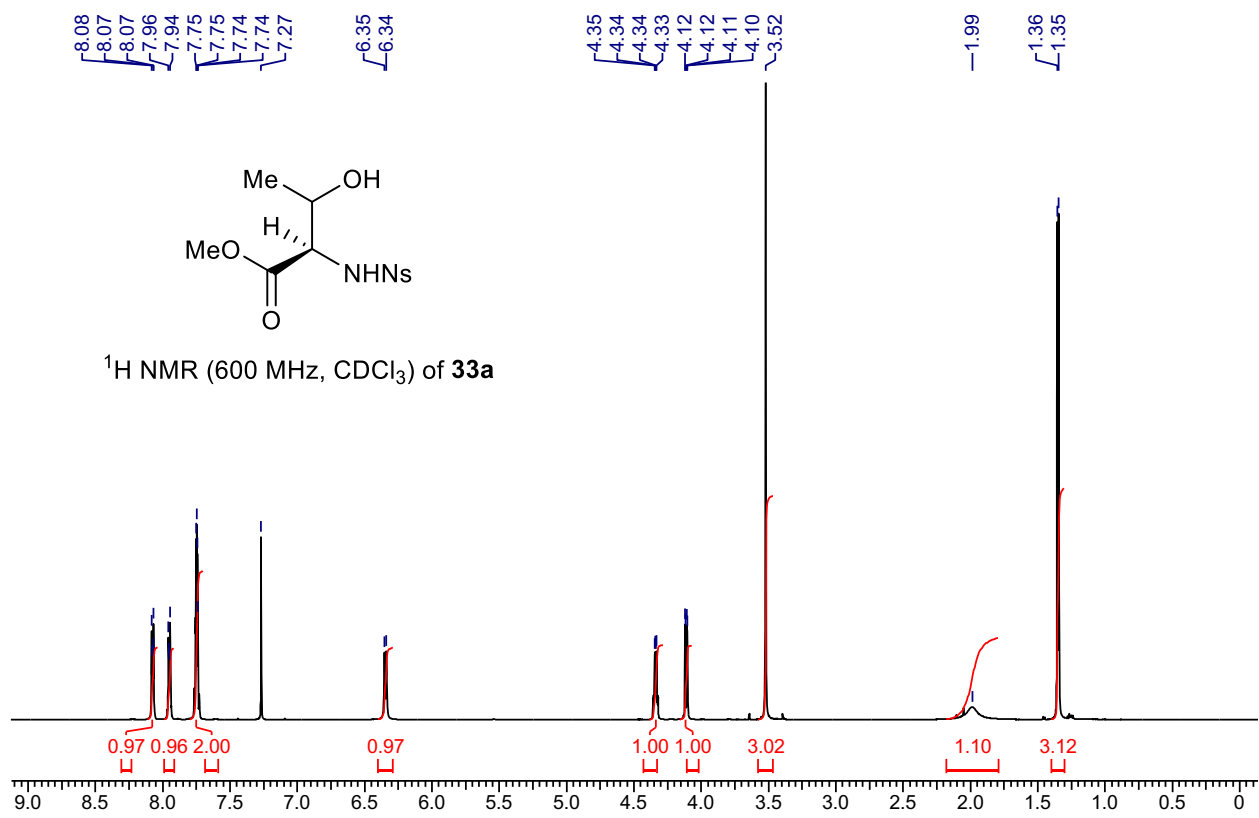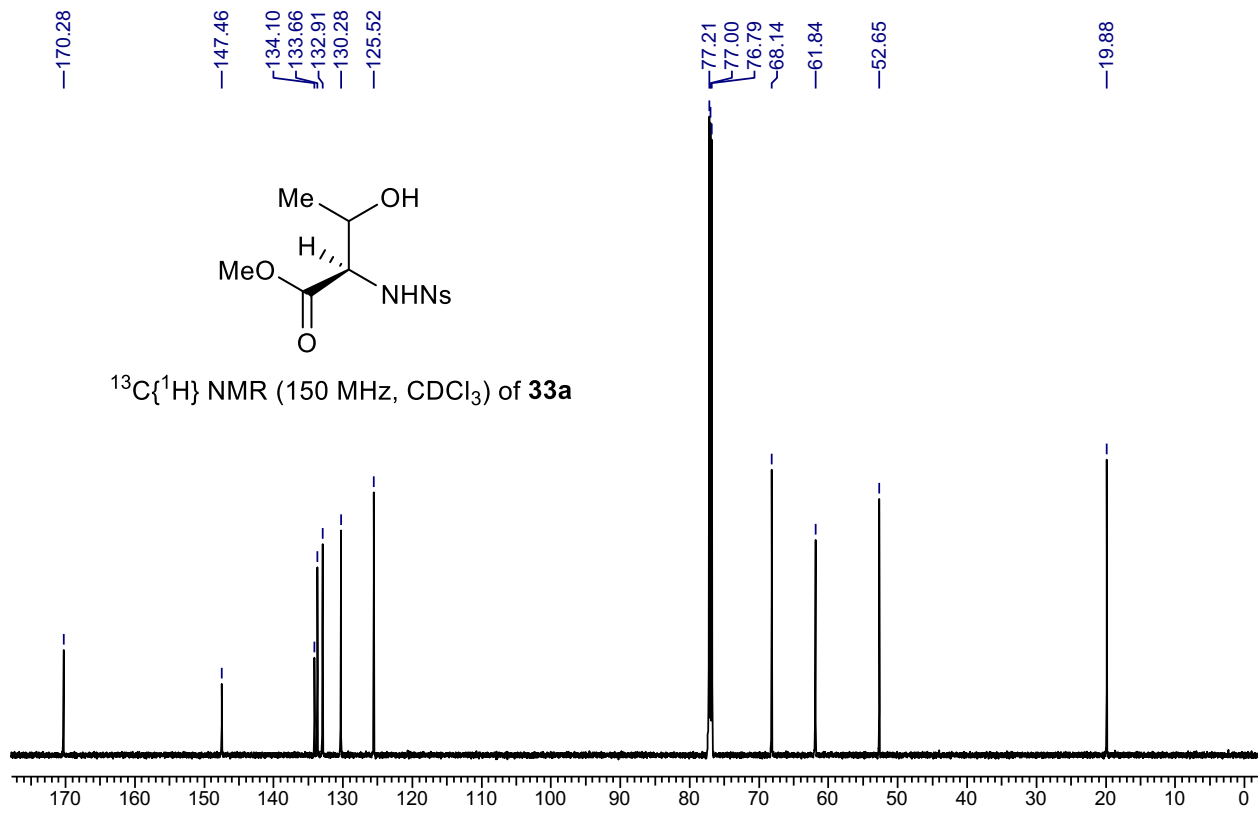

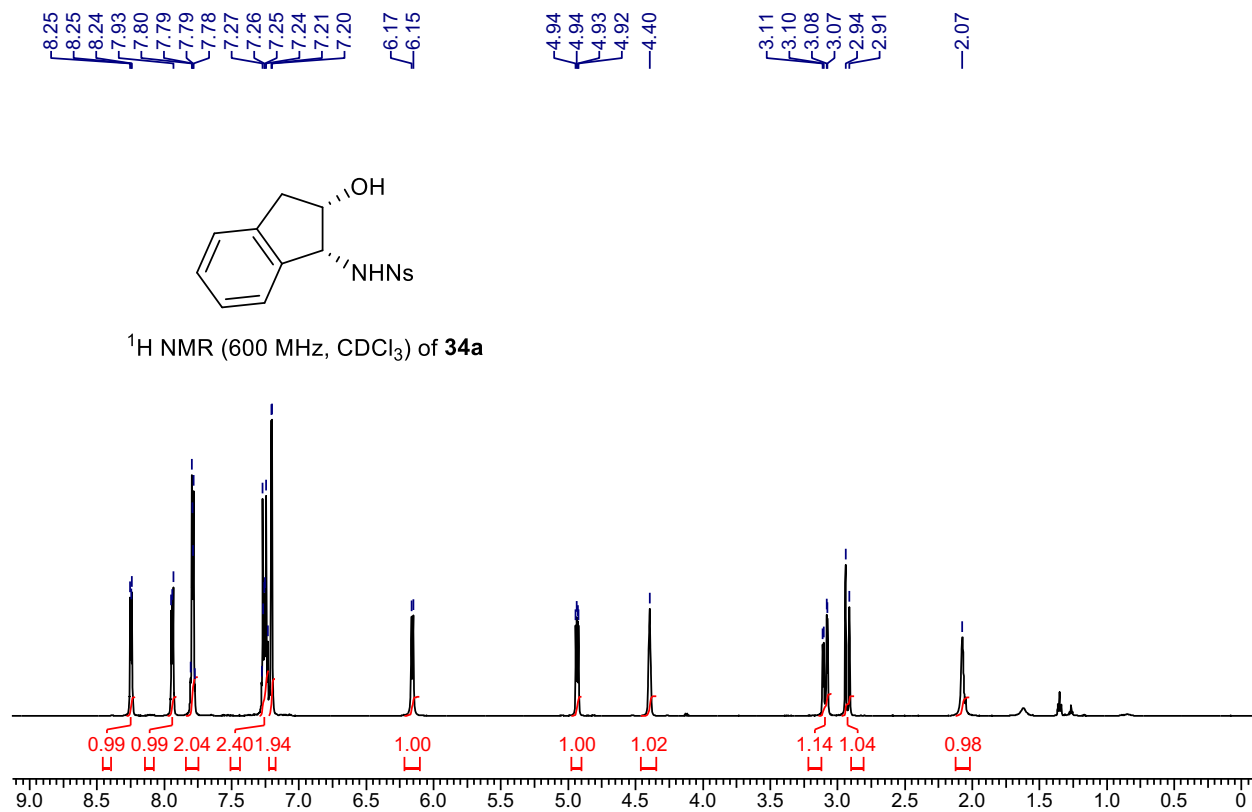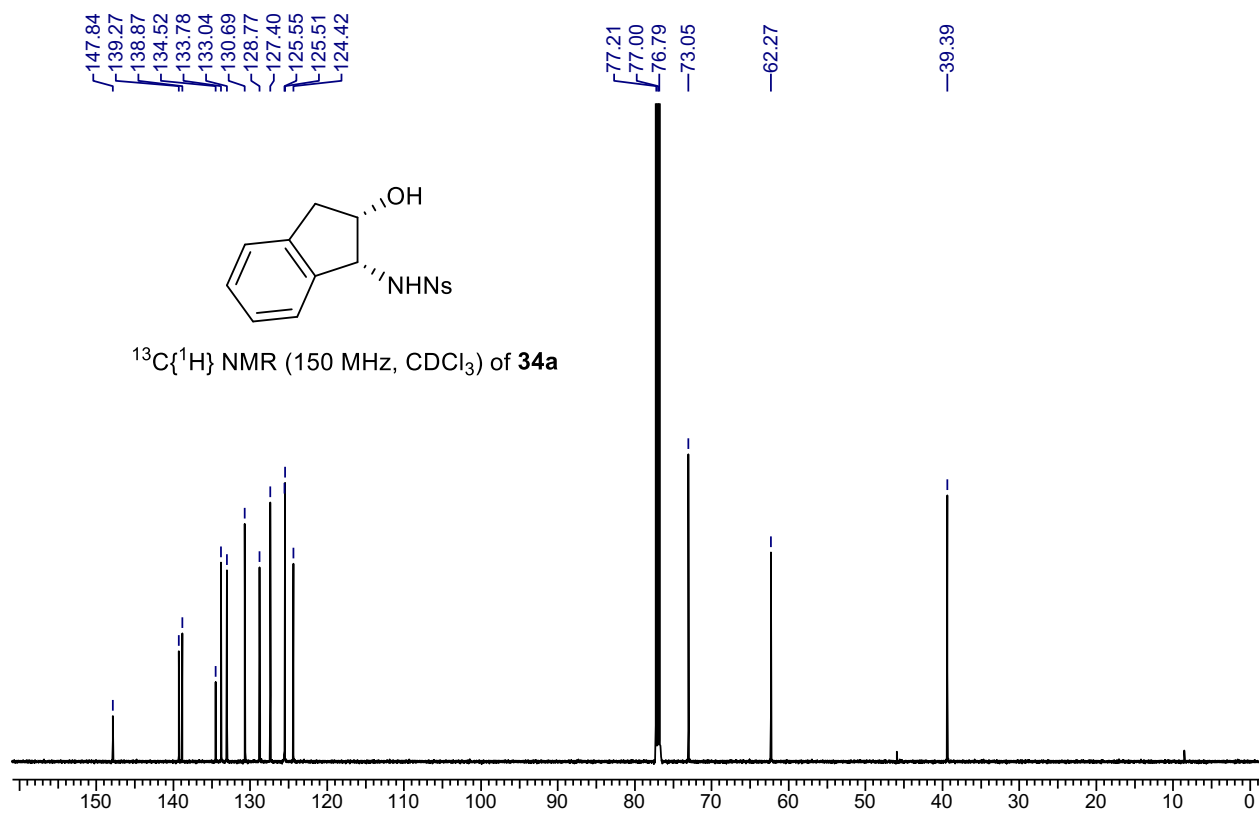



JA-M-01

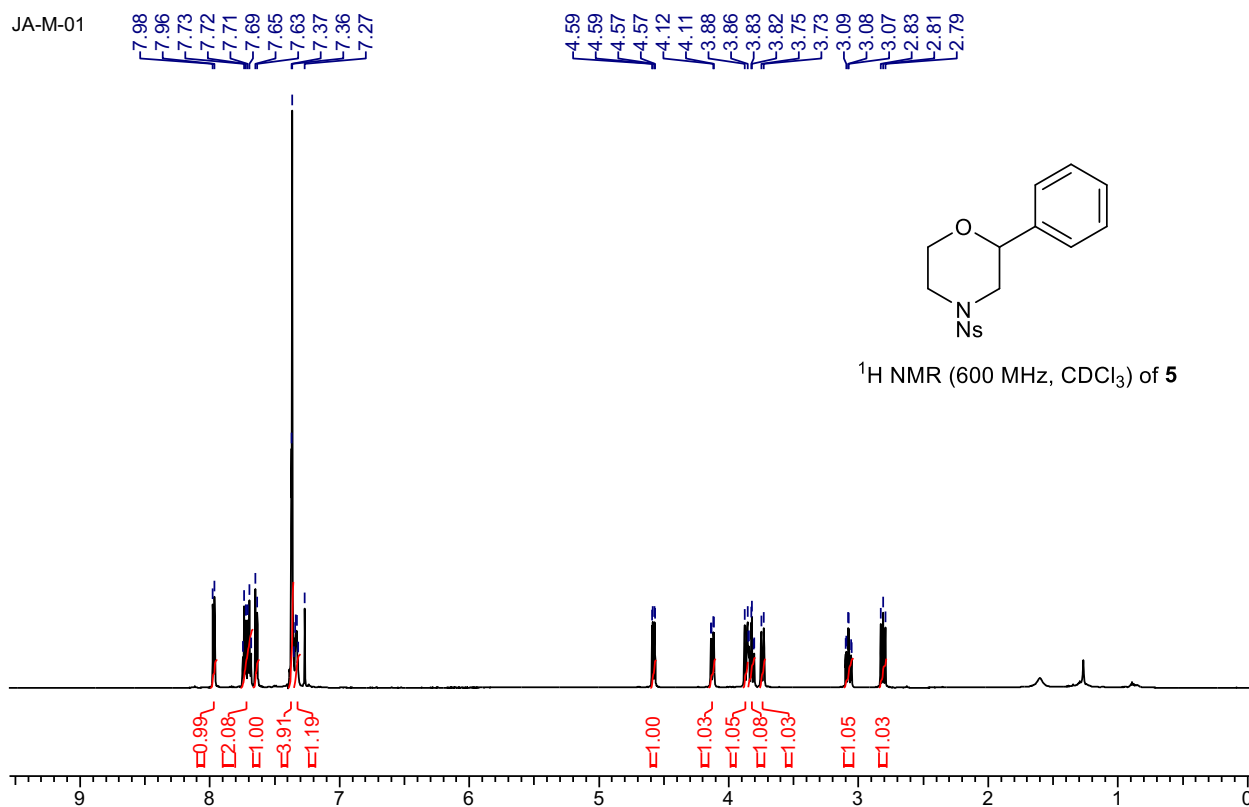

JA-M-01.001.esp

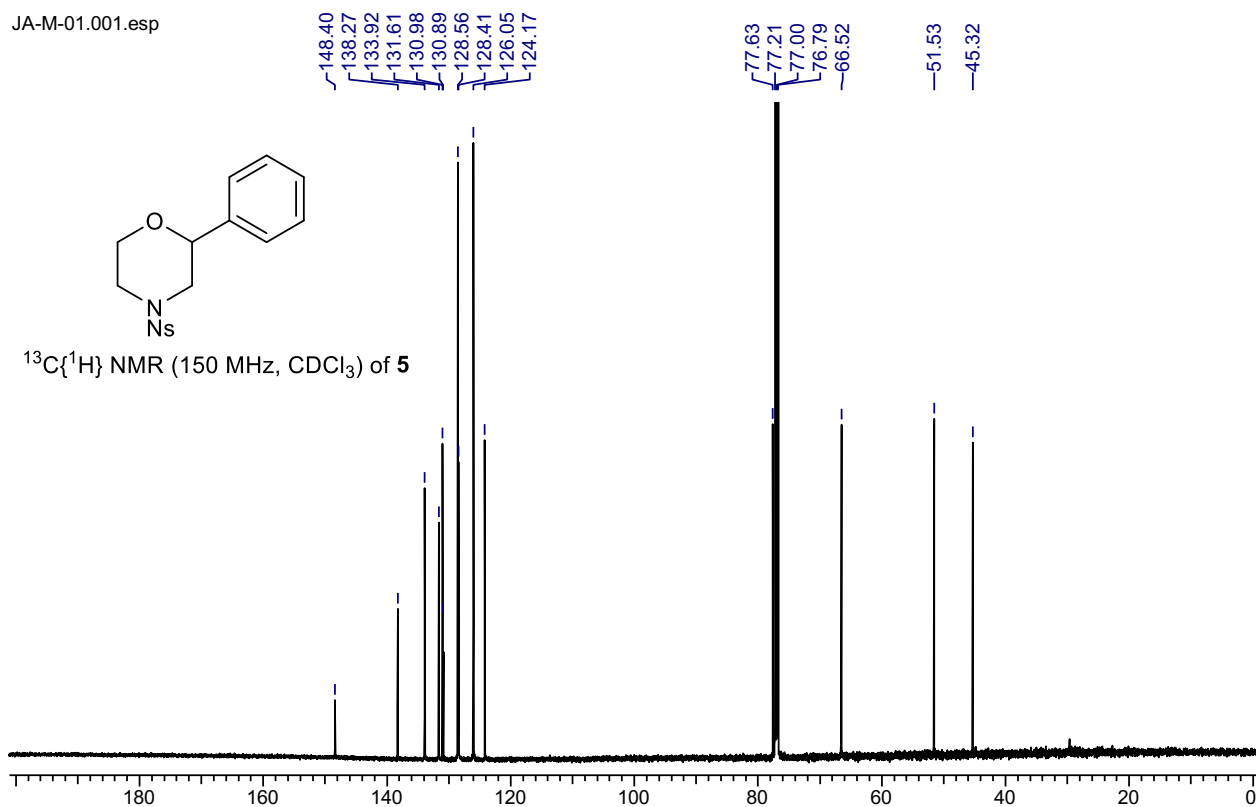

JA-M-08

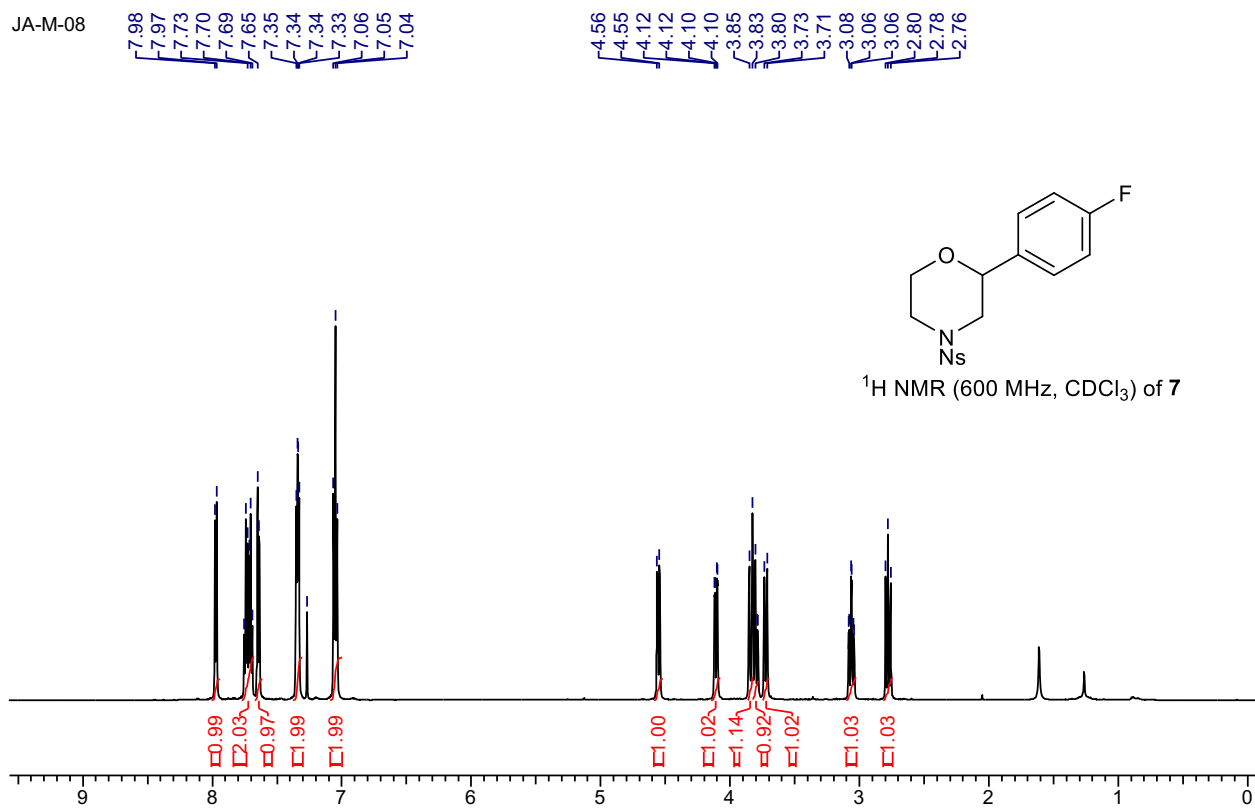

JA-M-08.001.esp

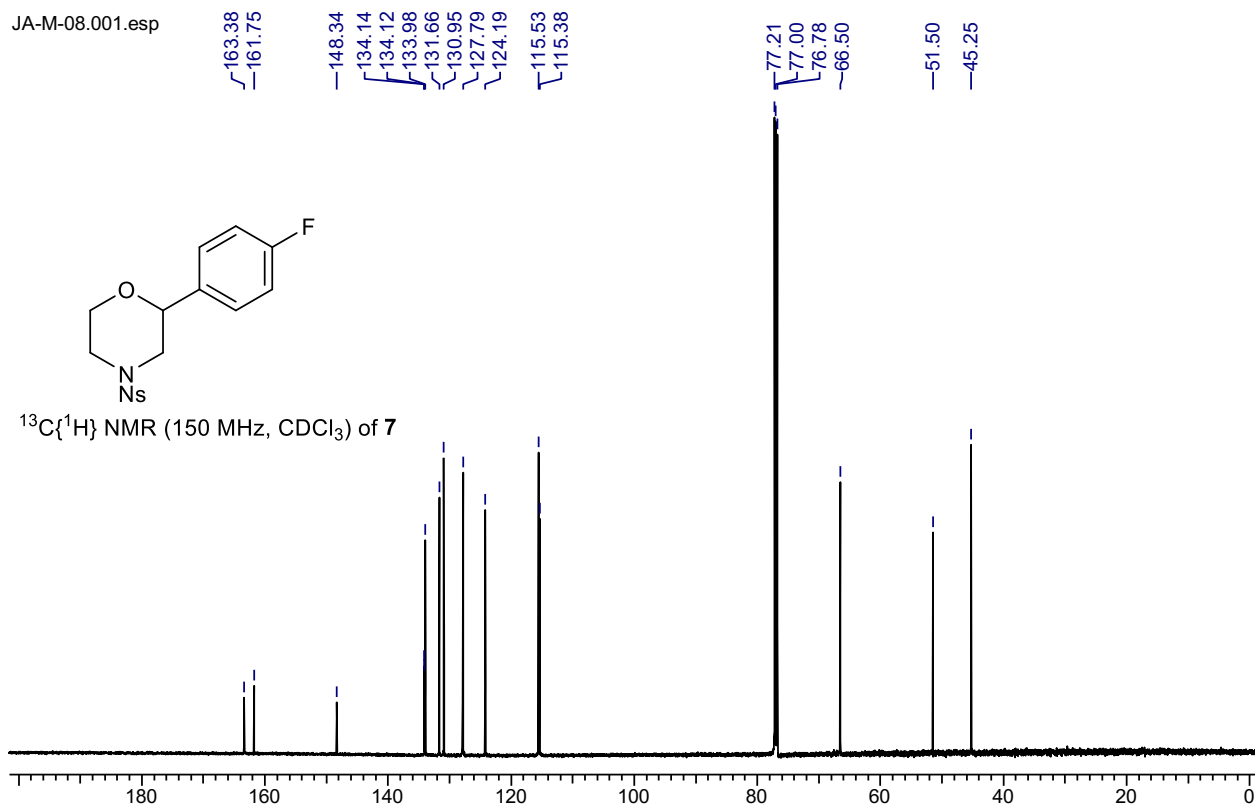

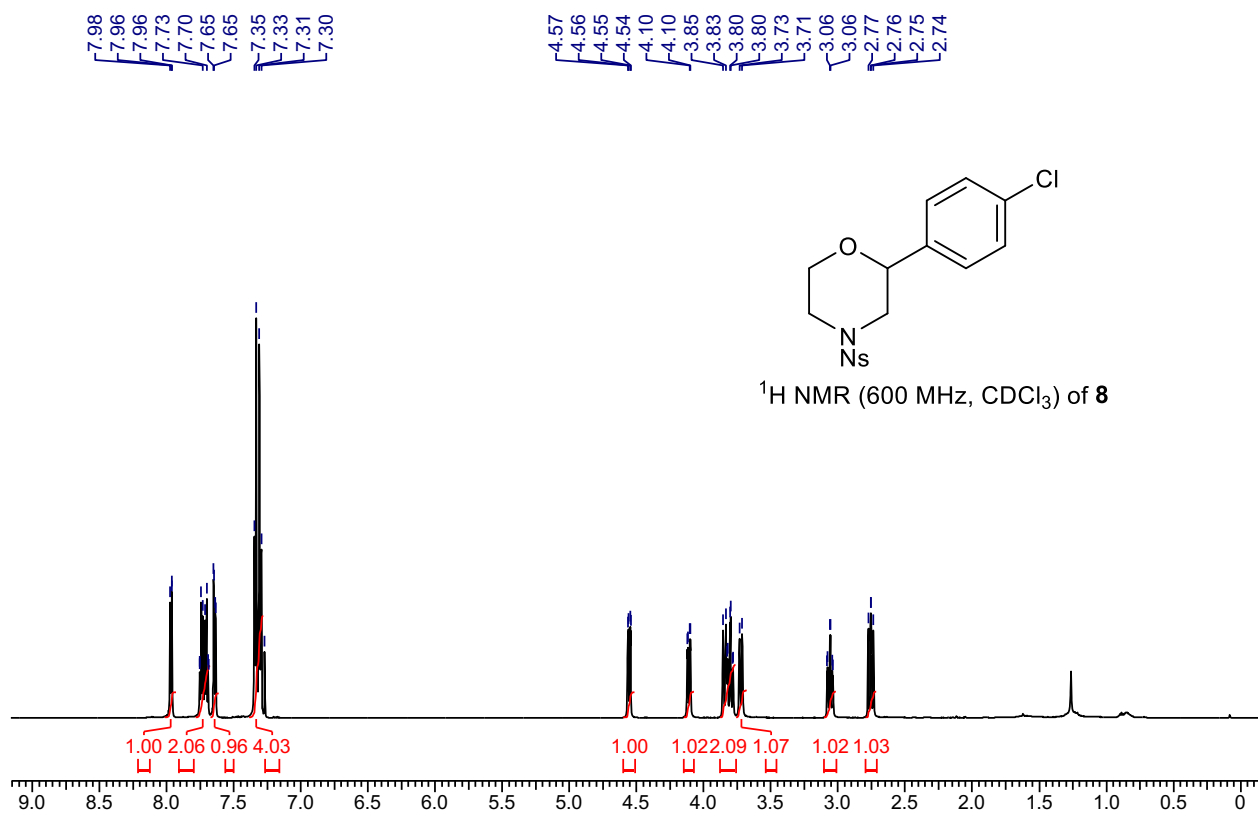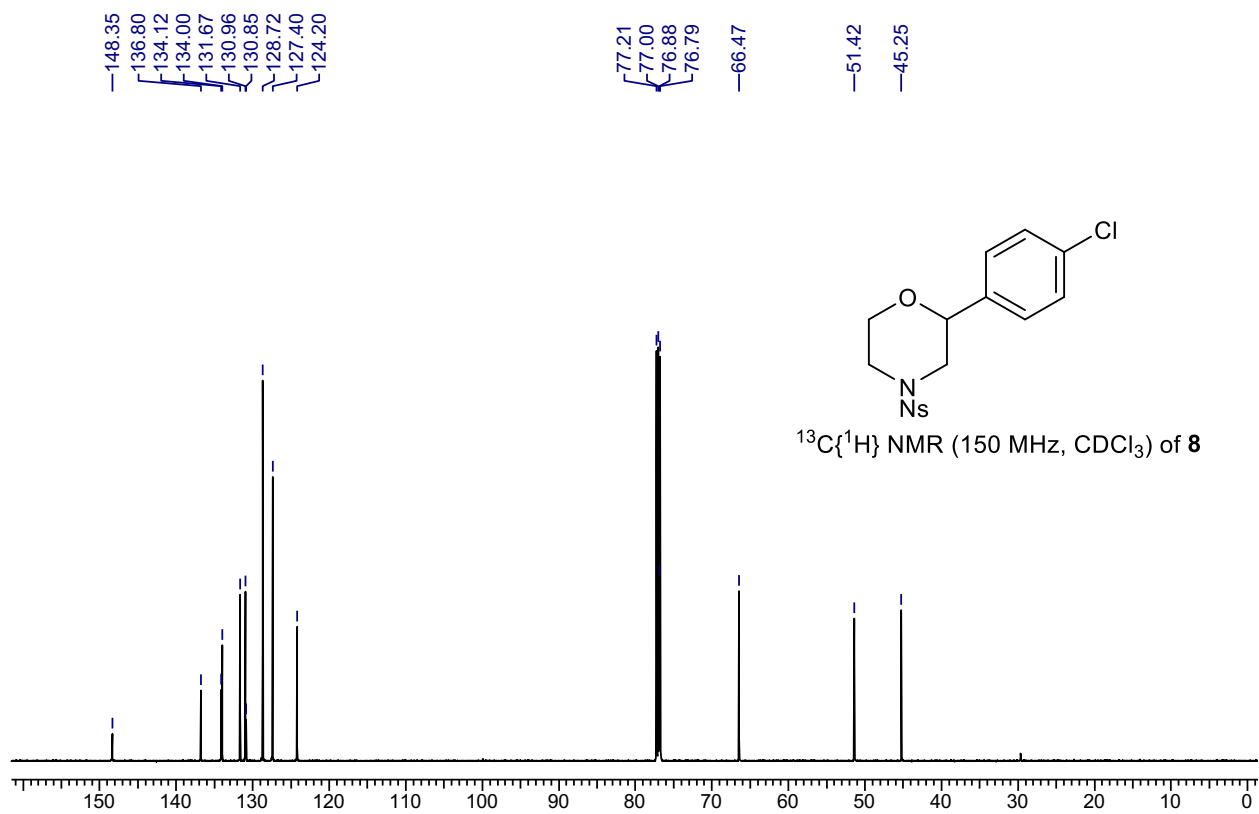

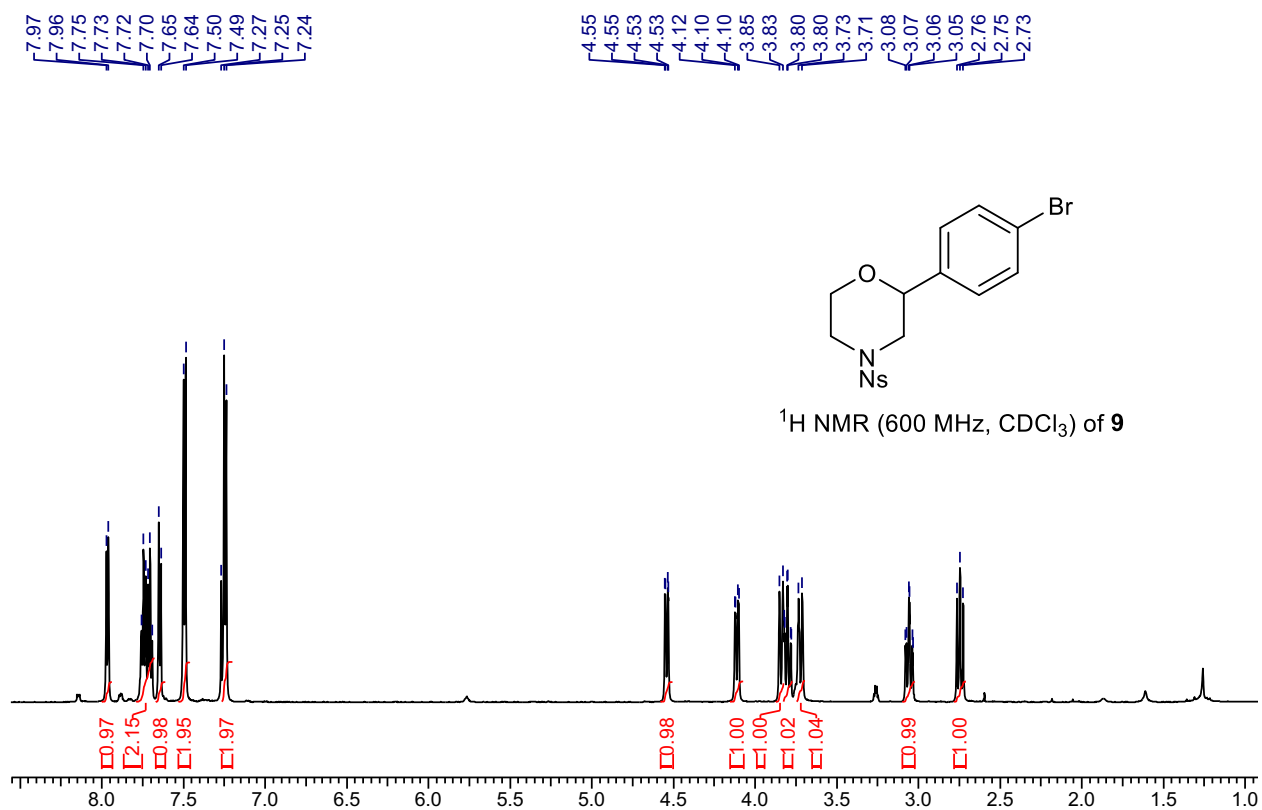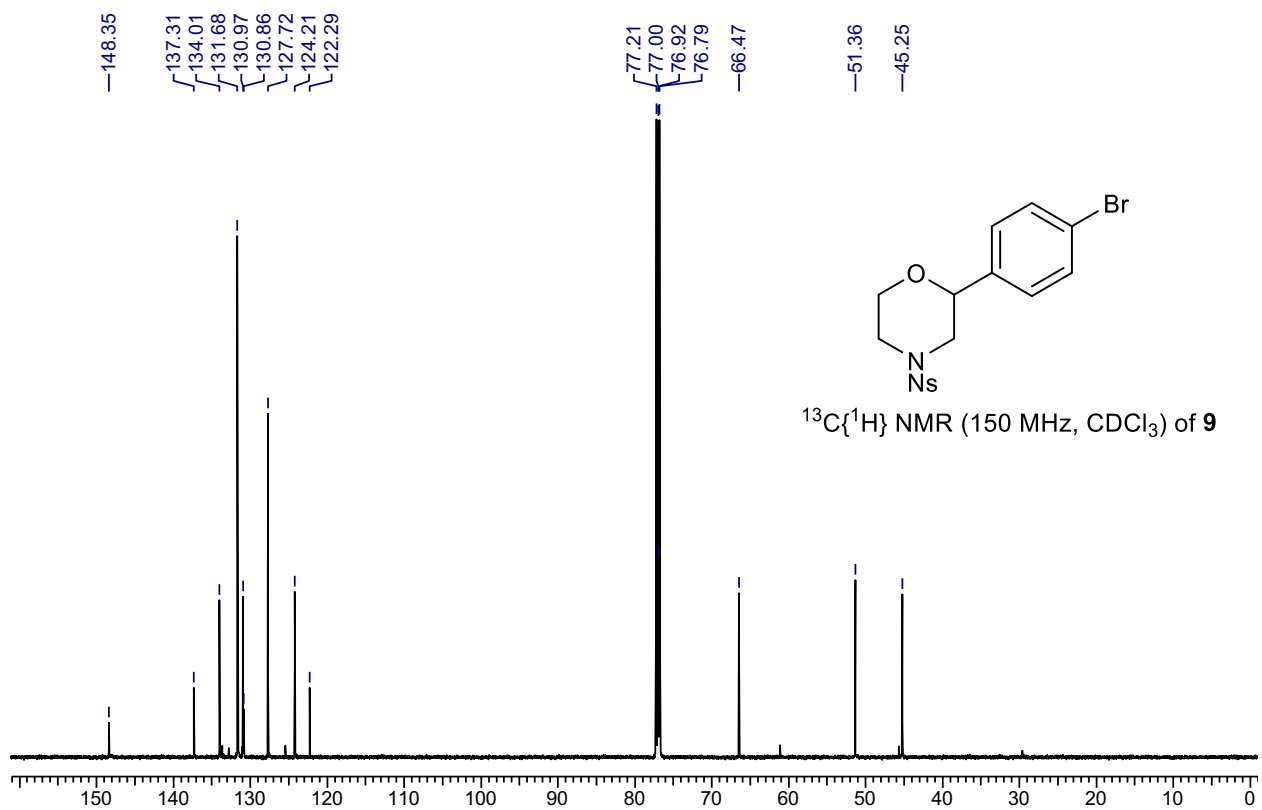

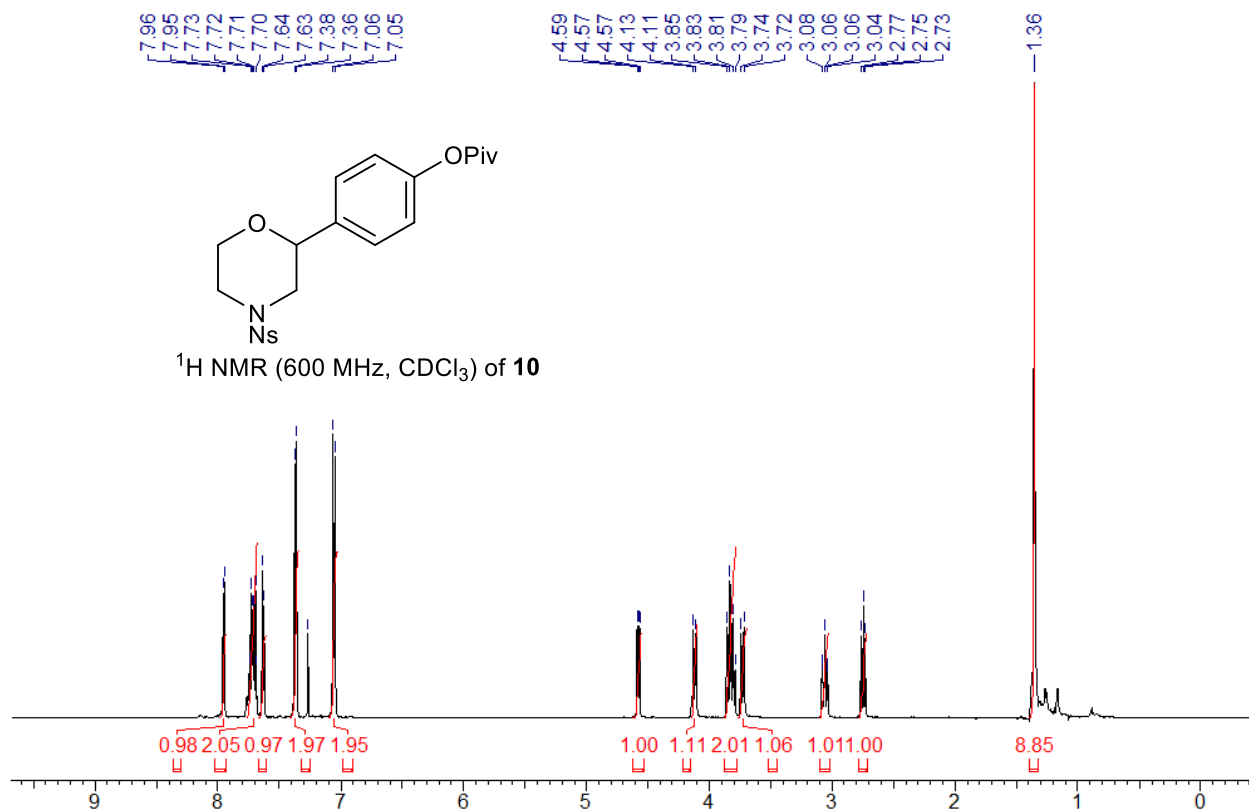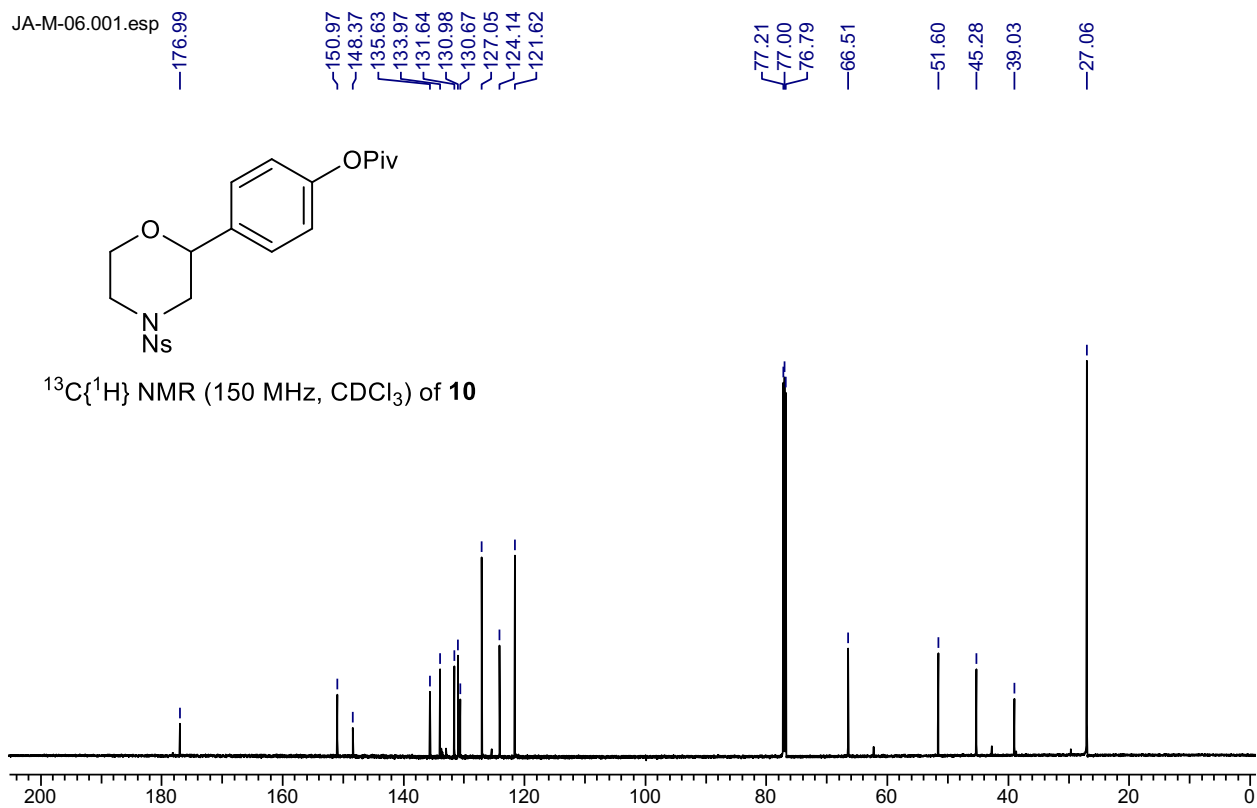

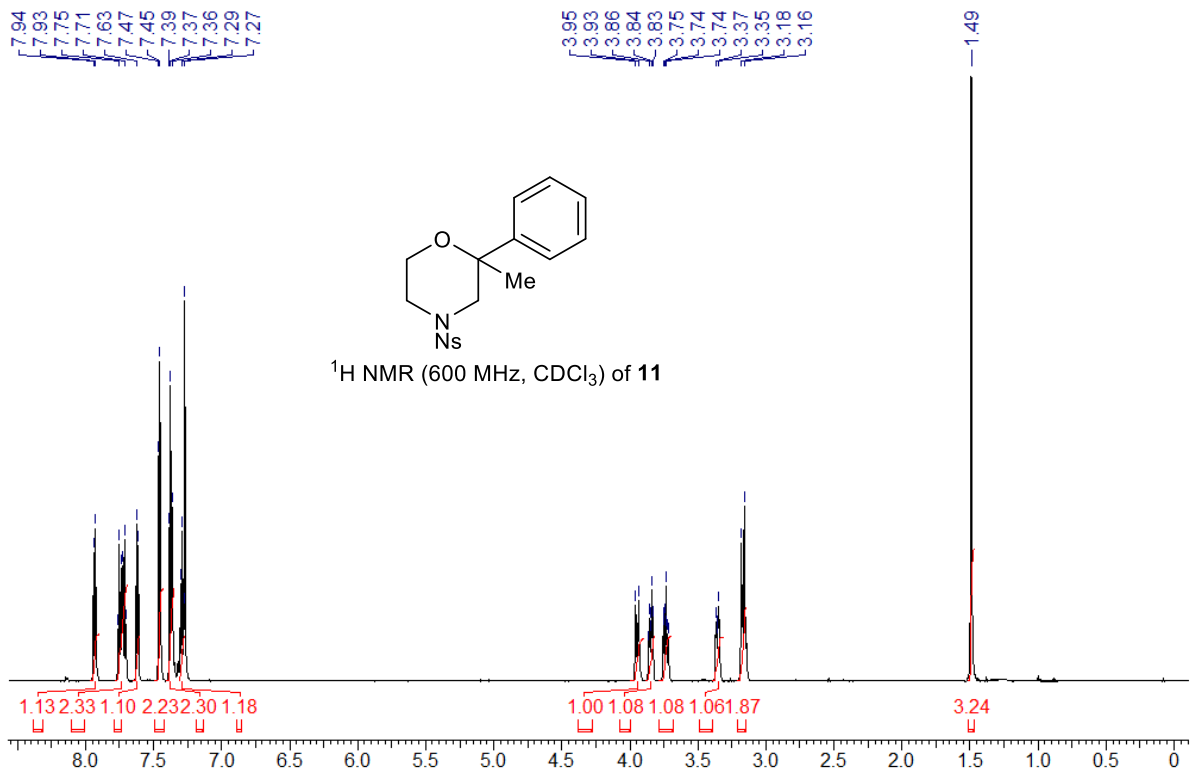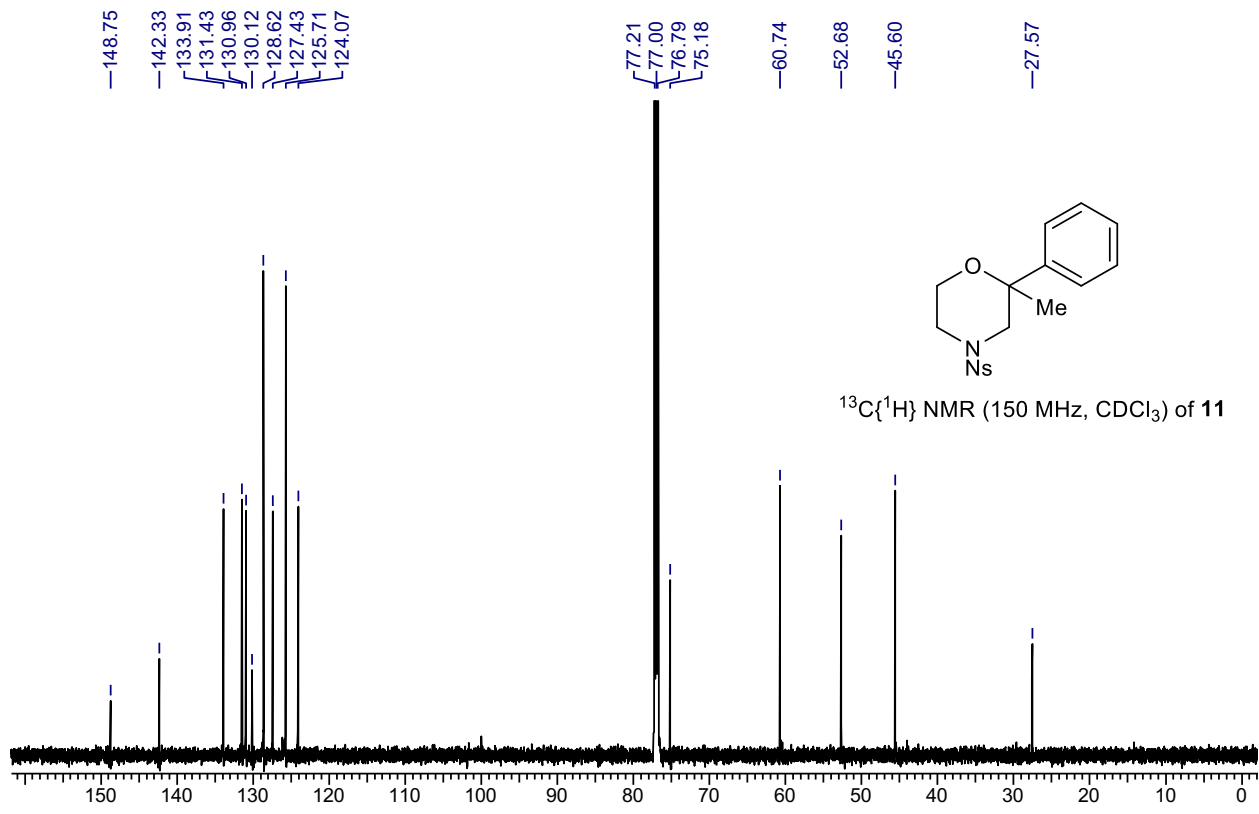

na-6-90-4p

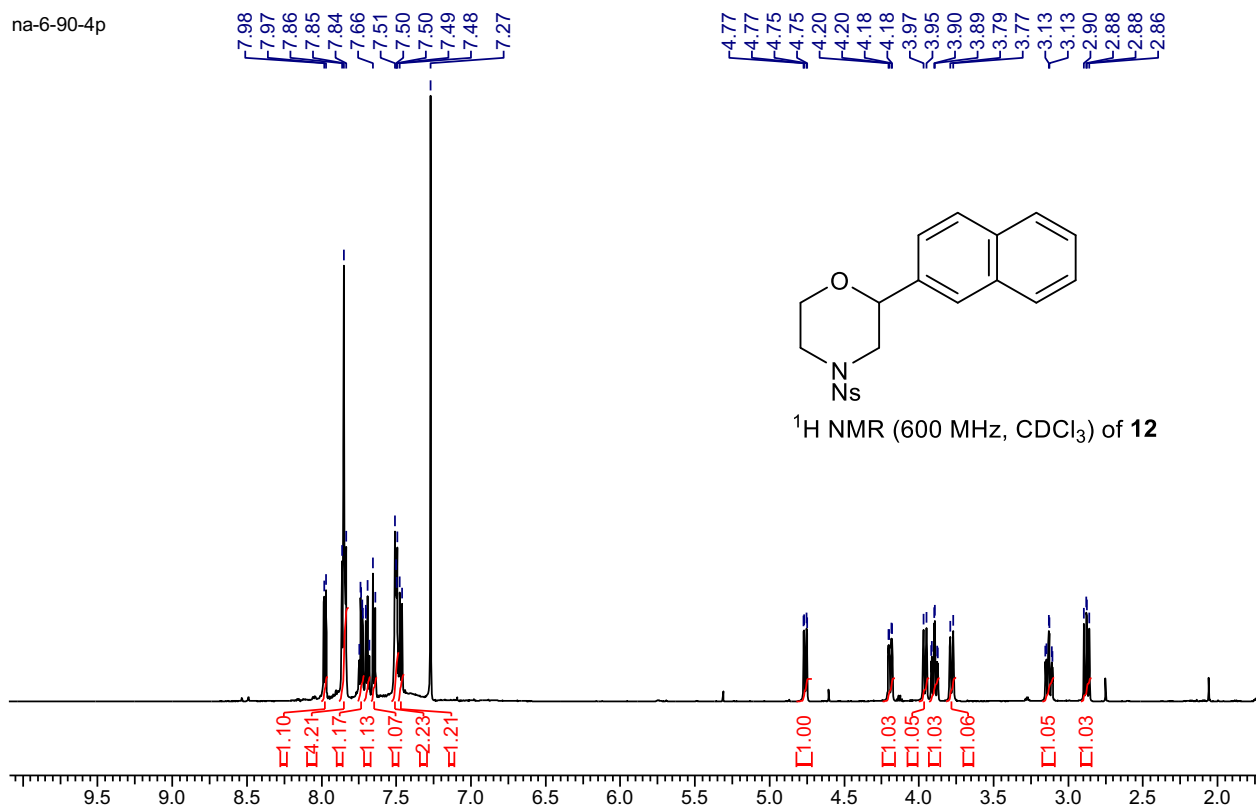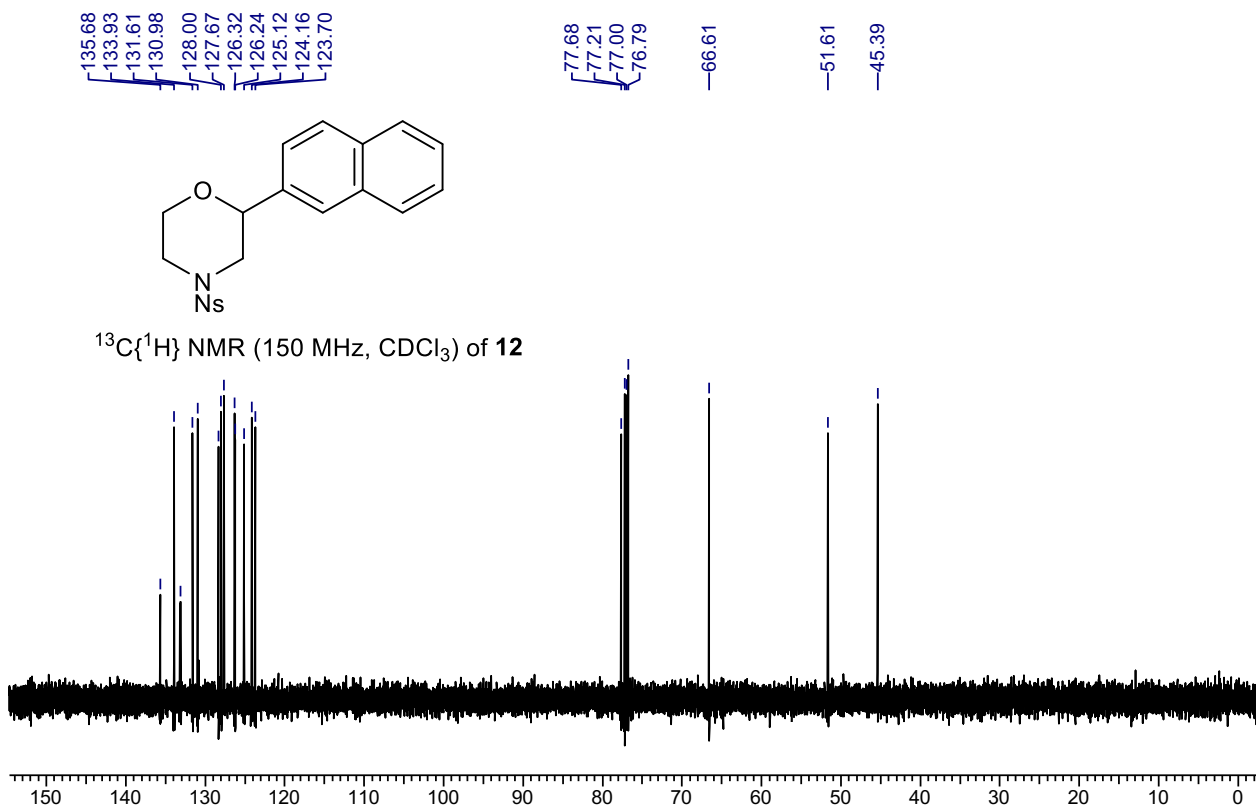

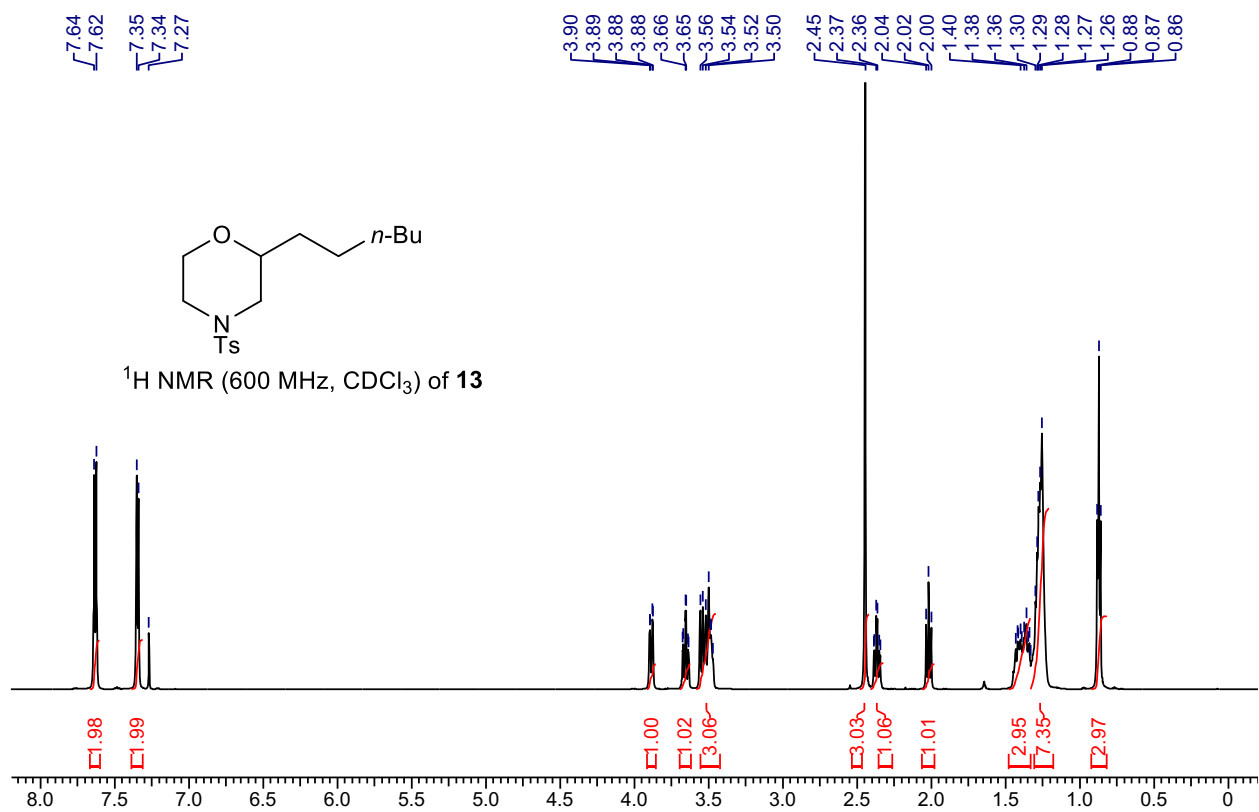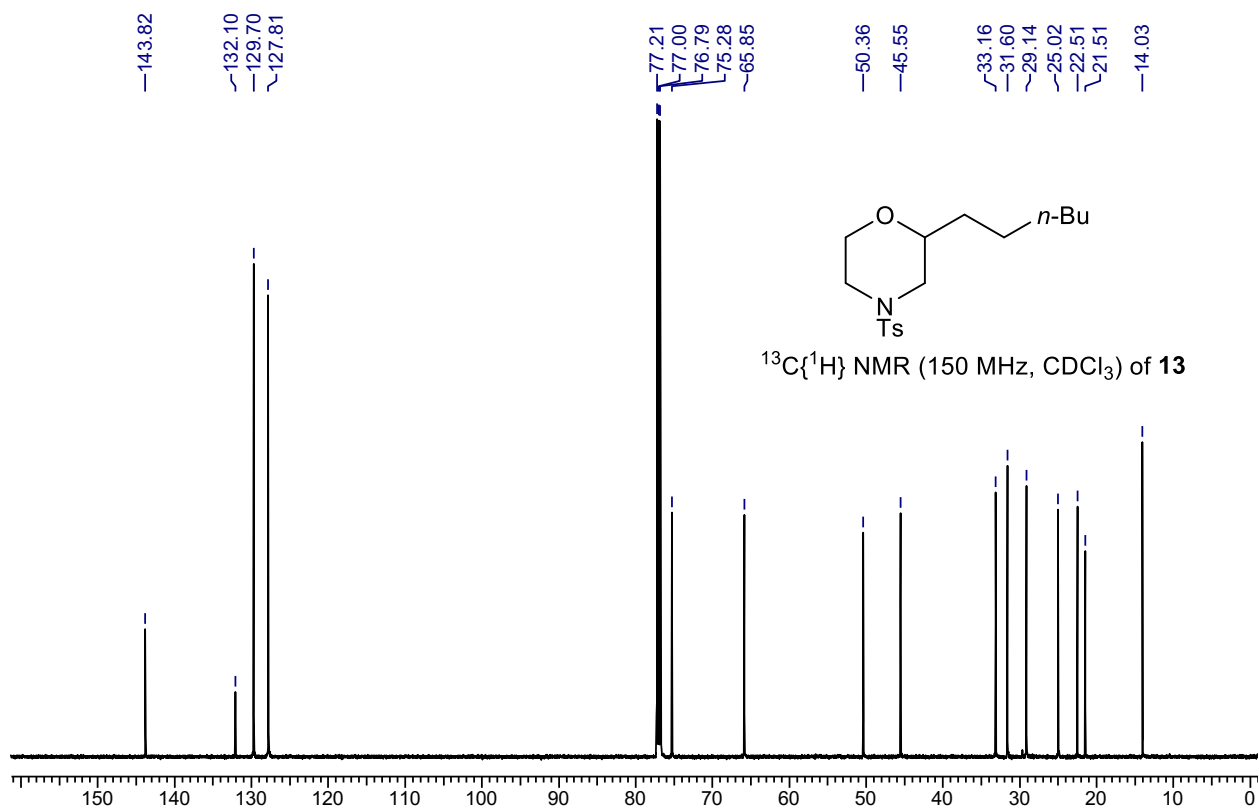



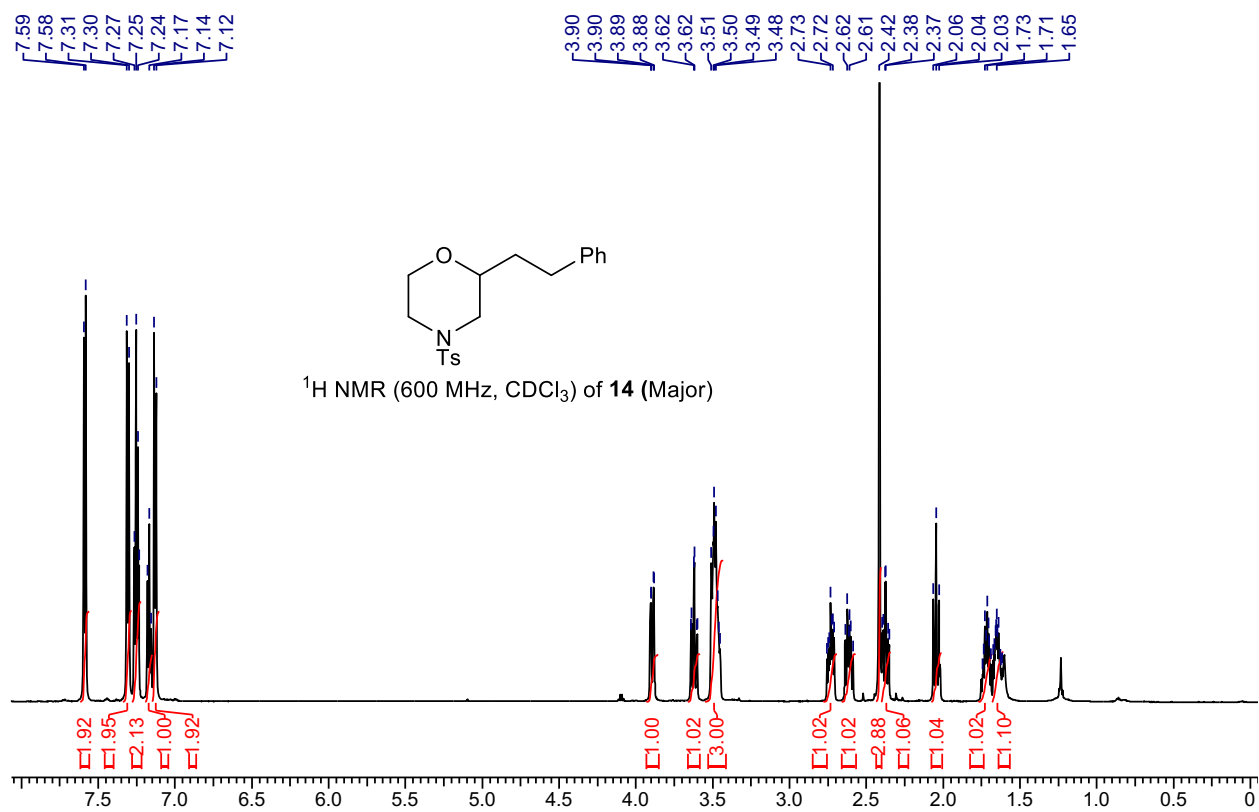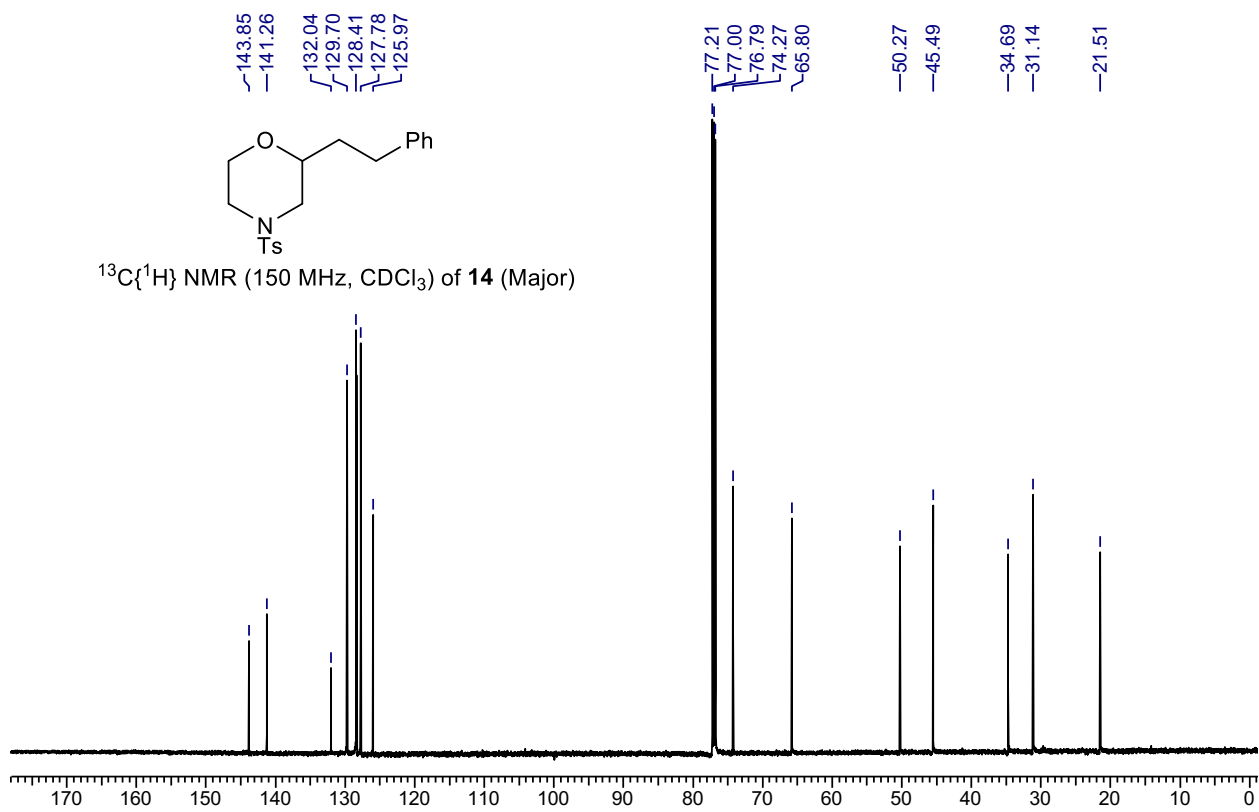

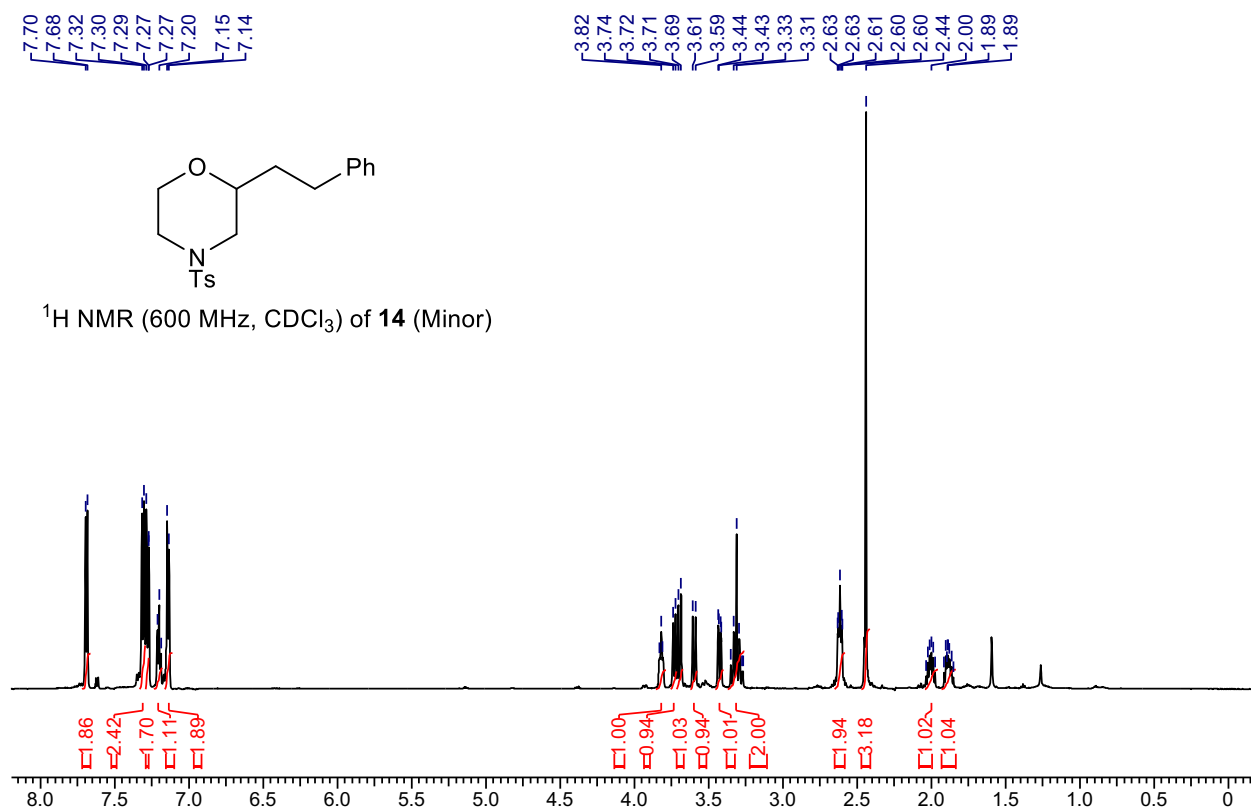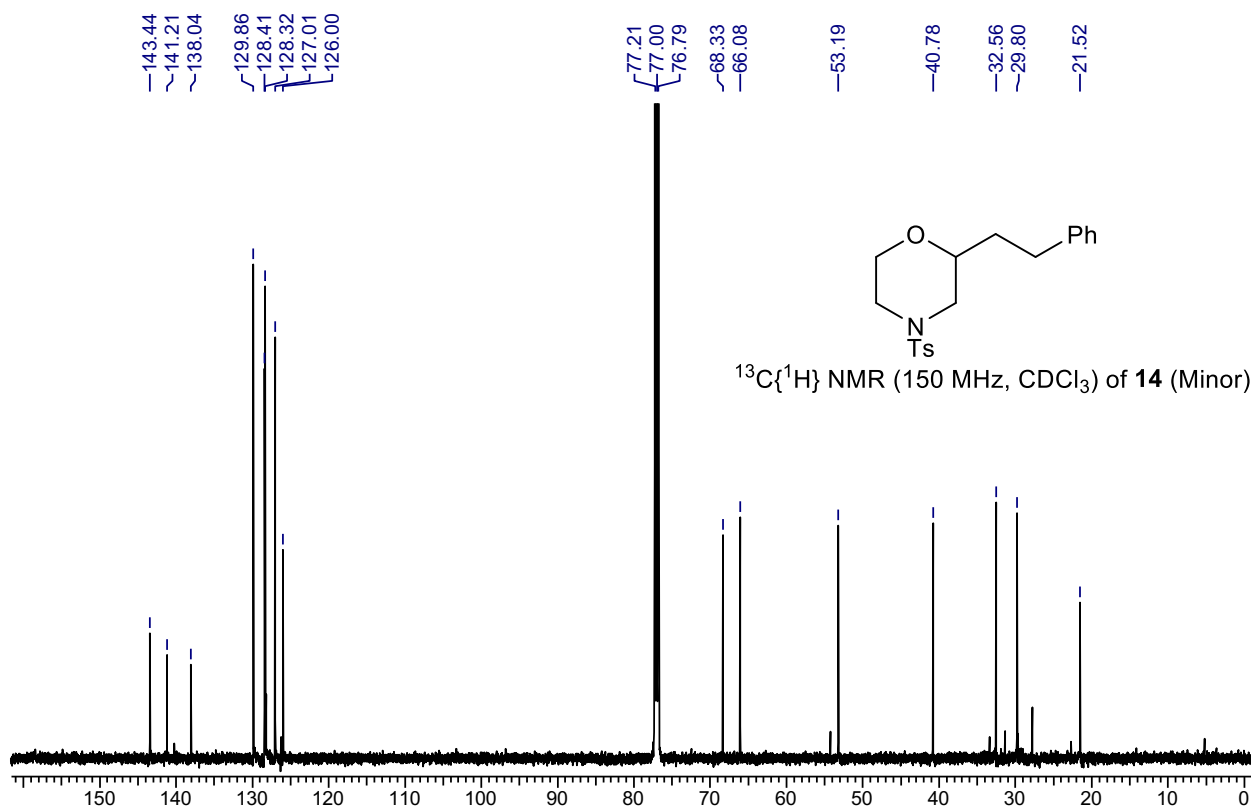

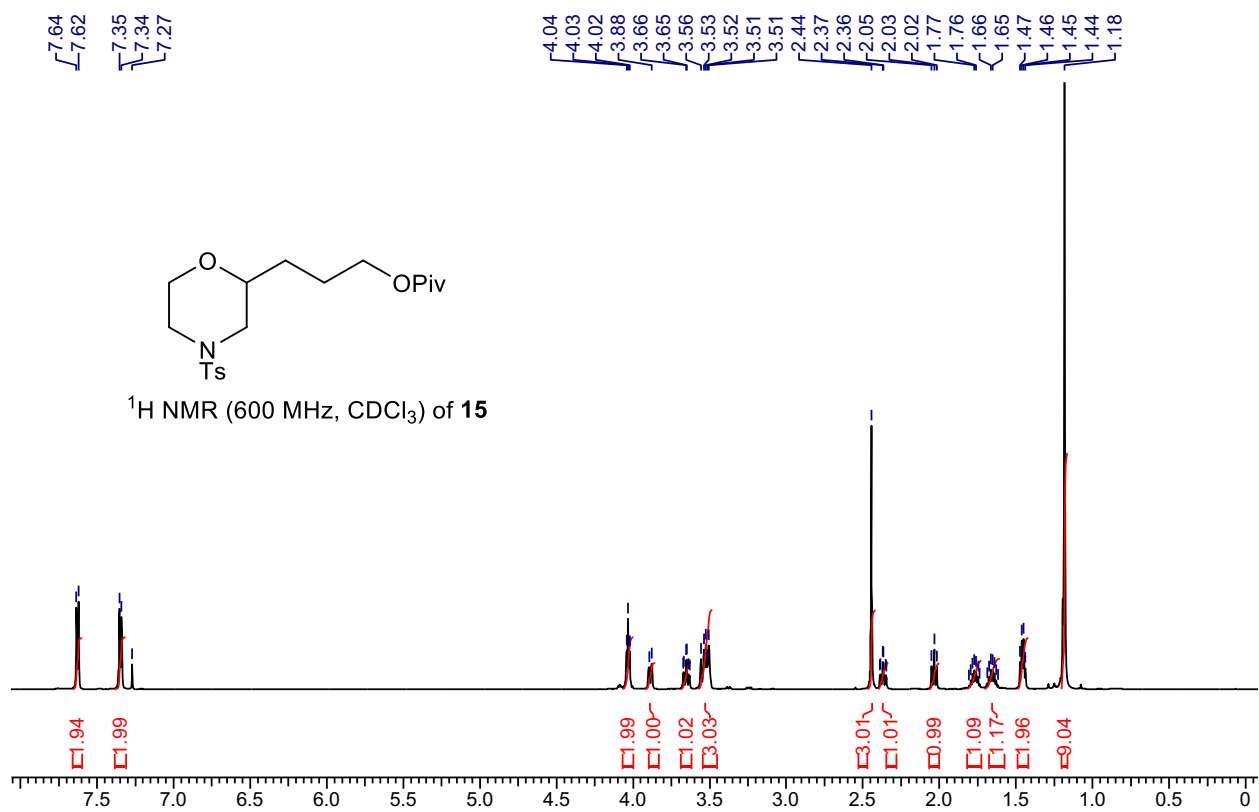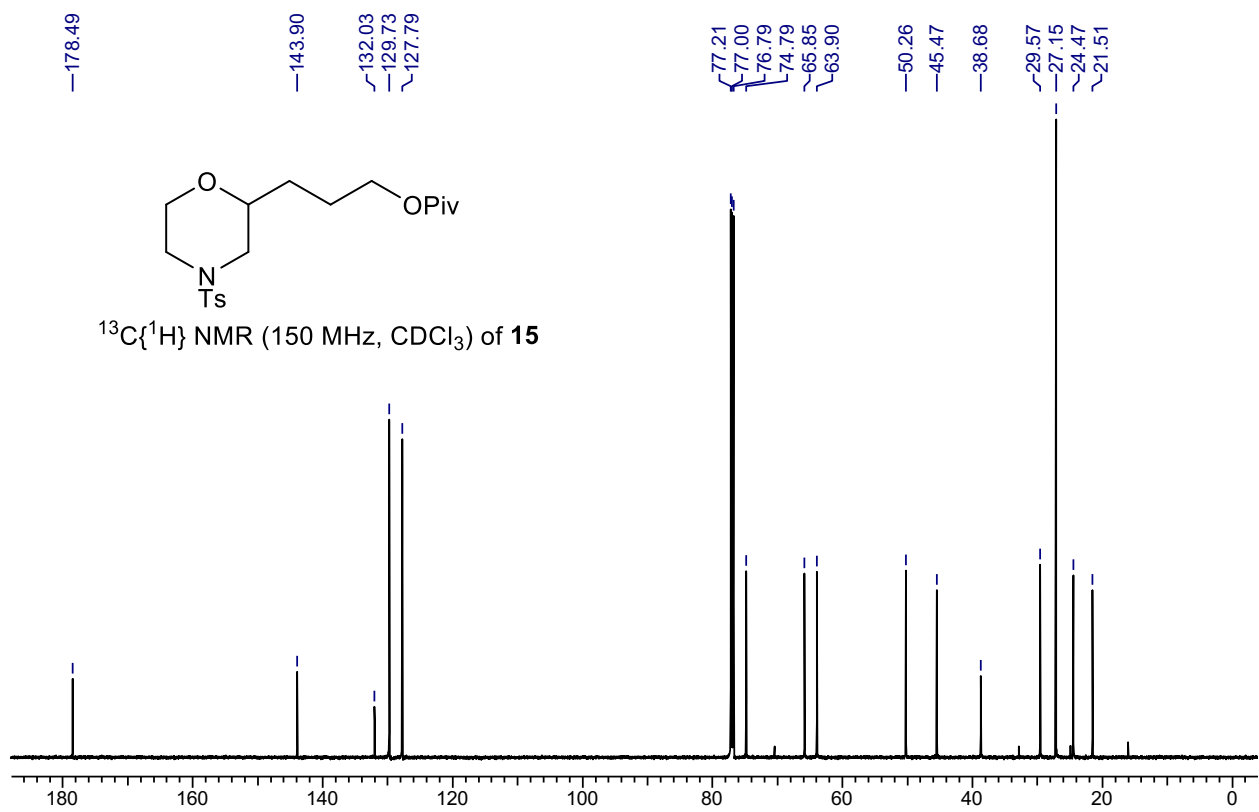

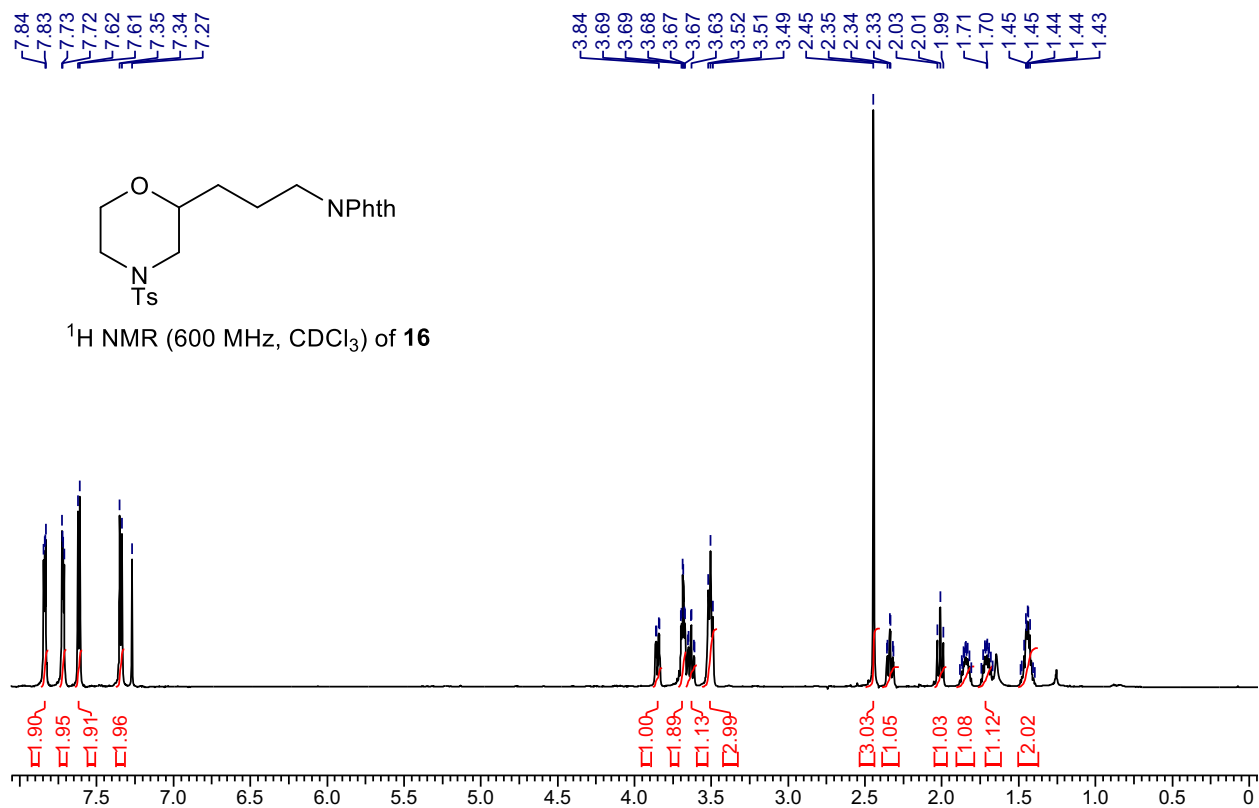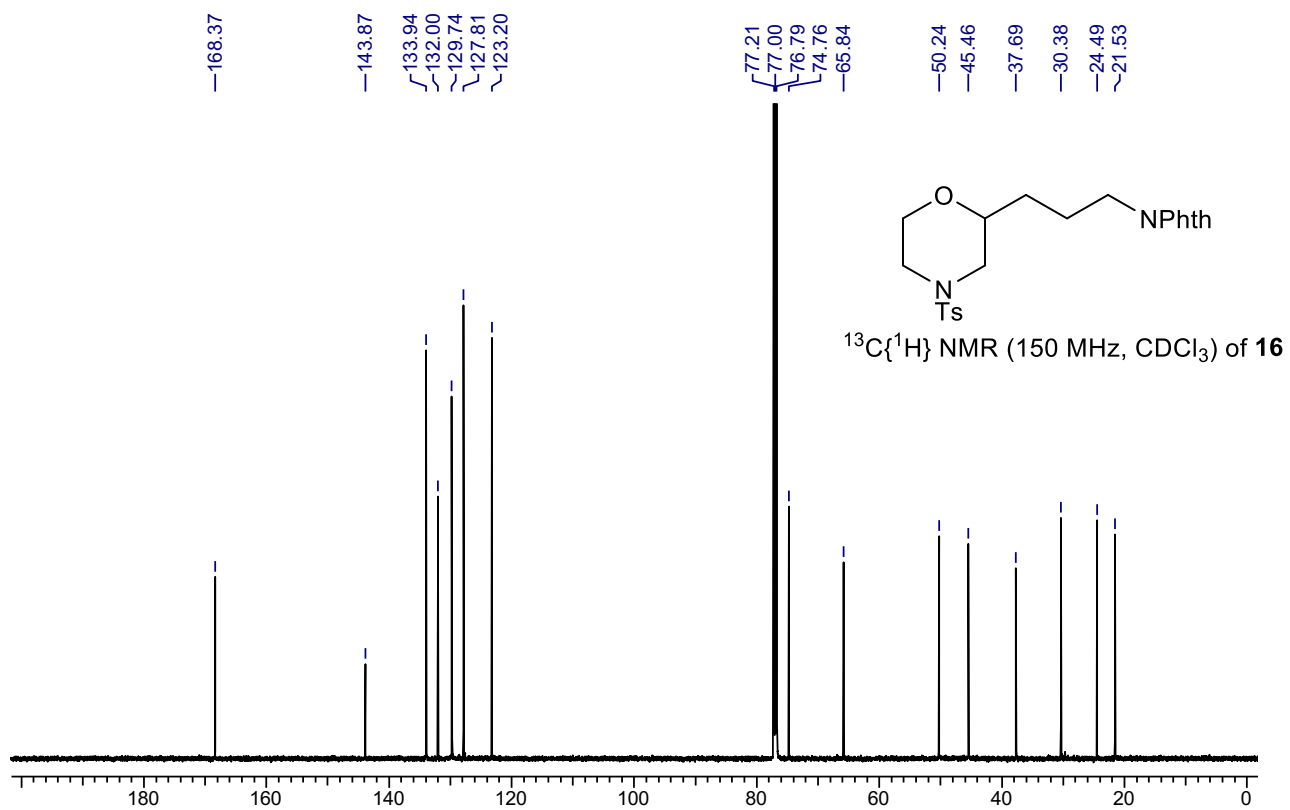

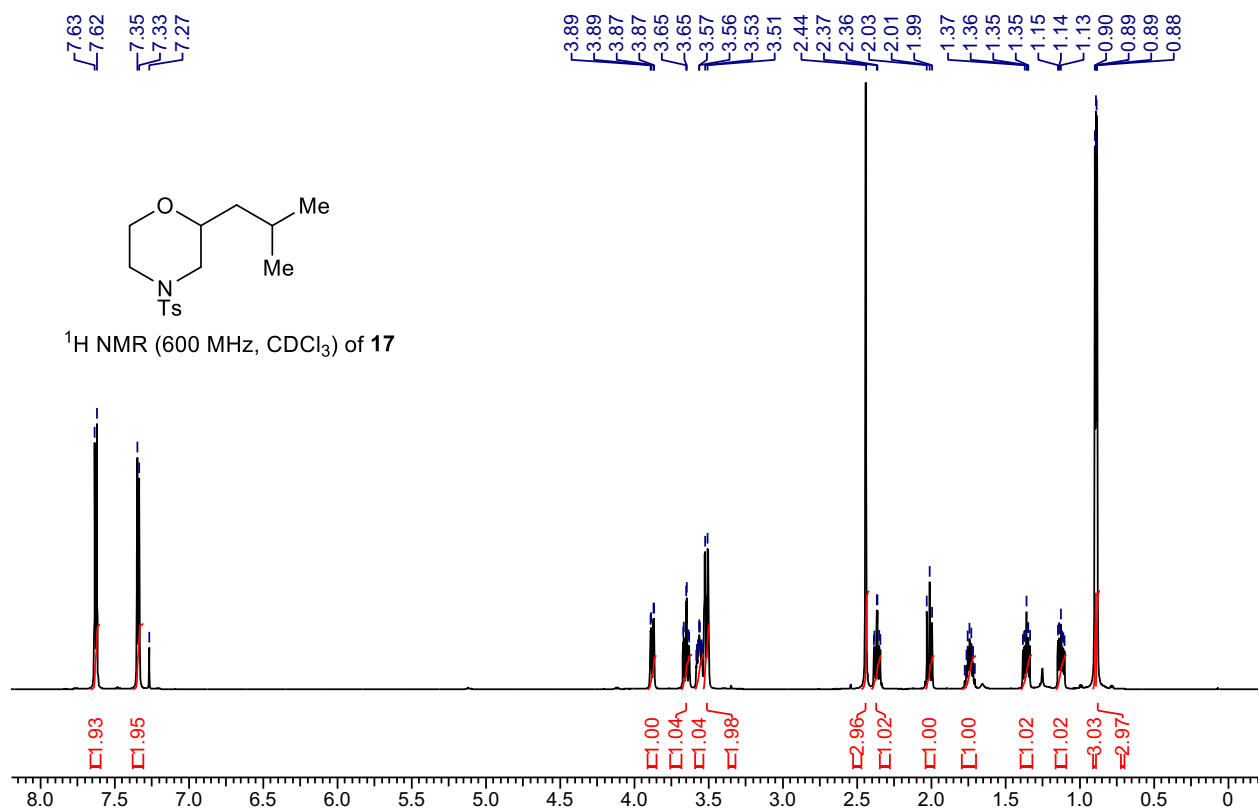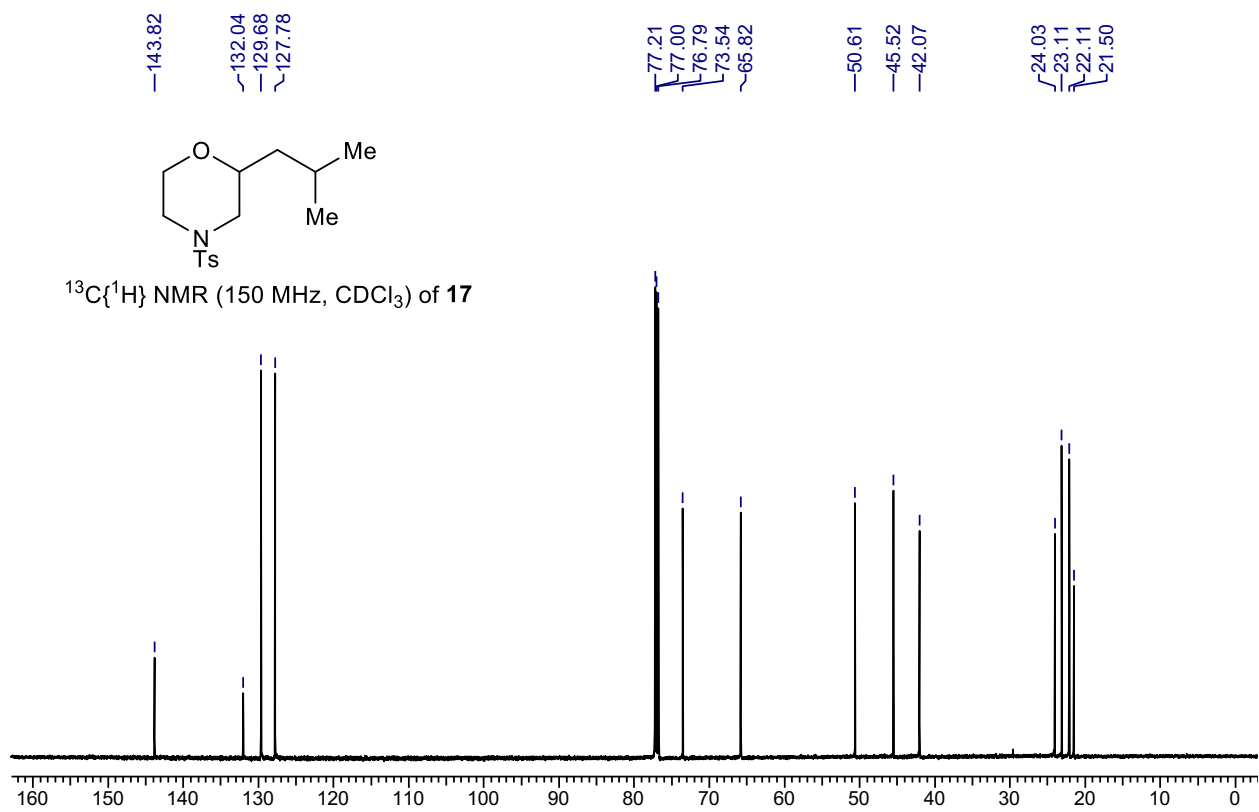

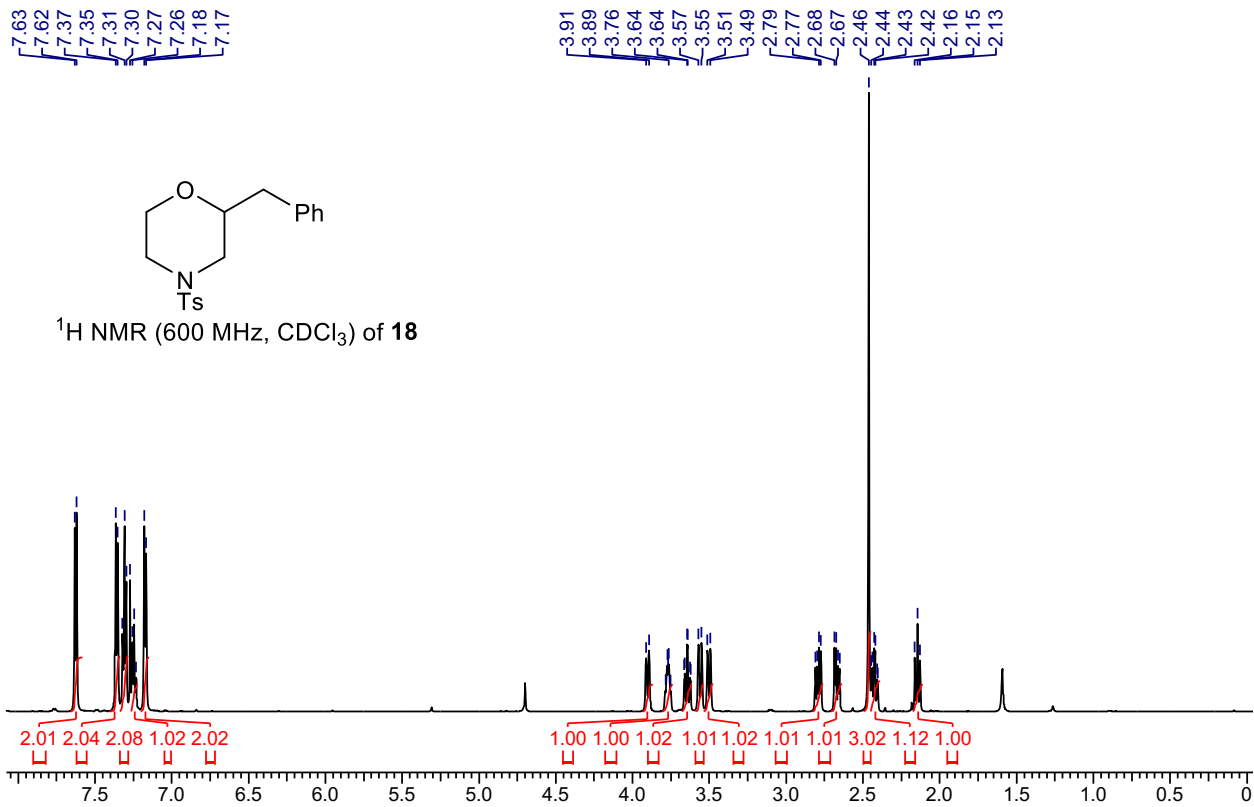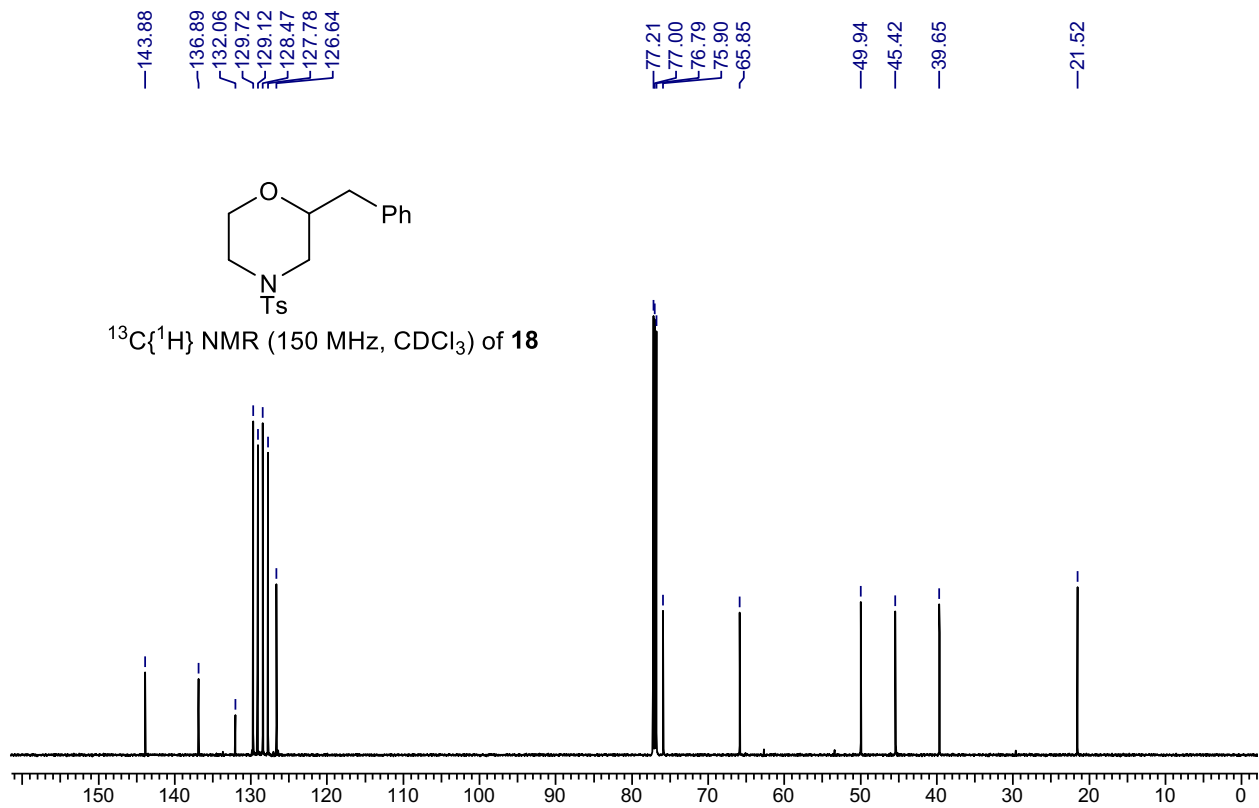

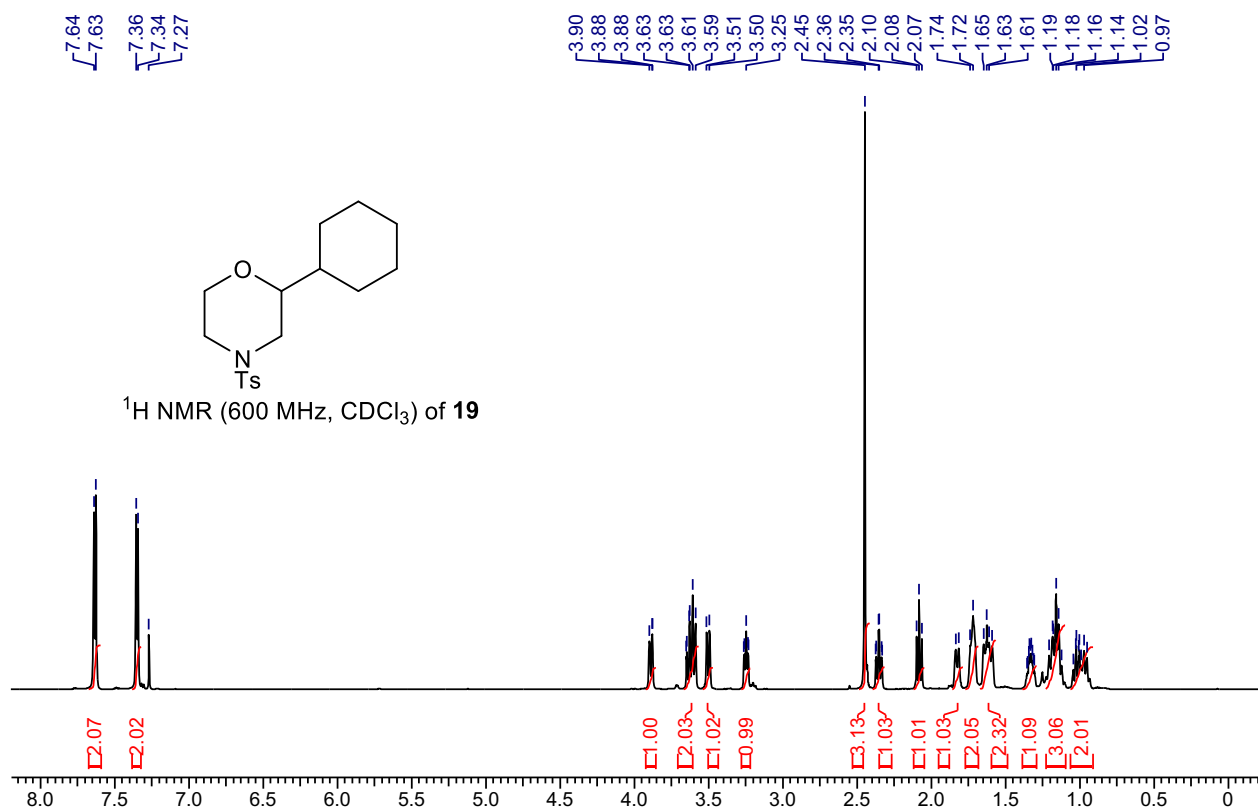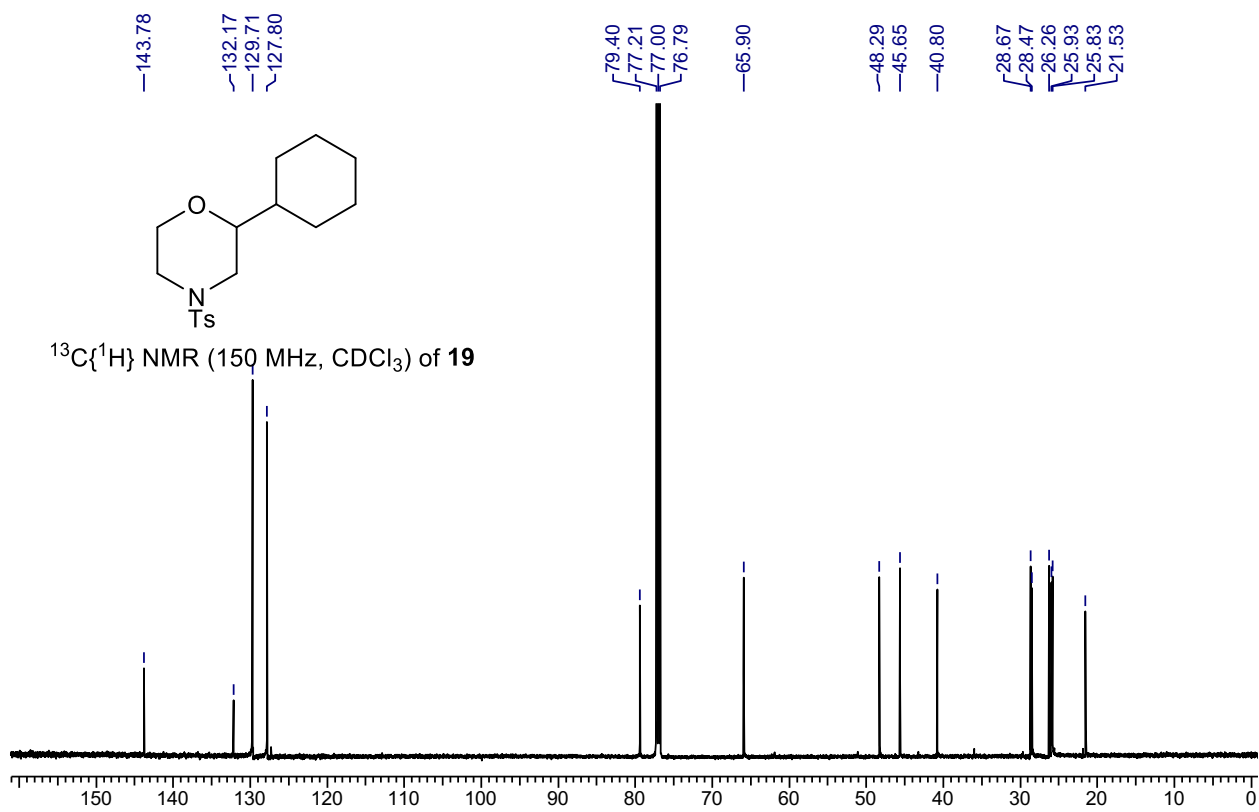

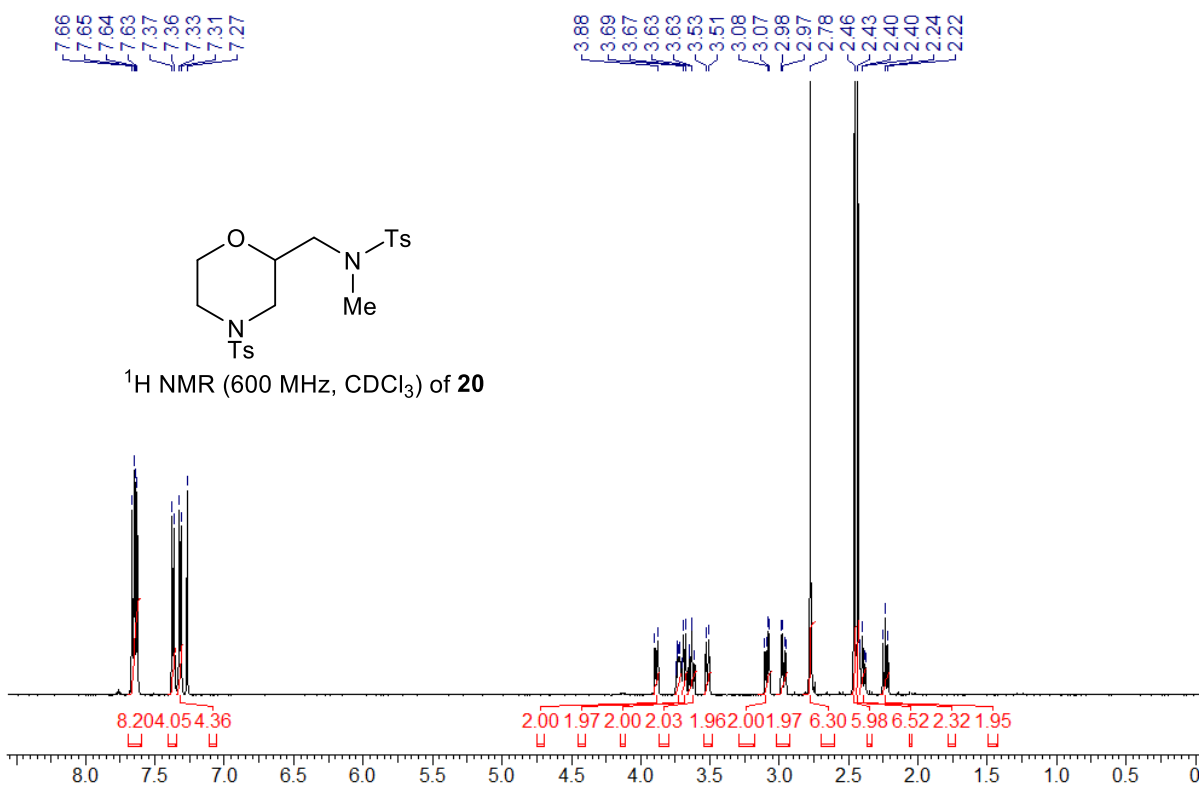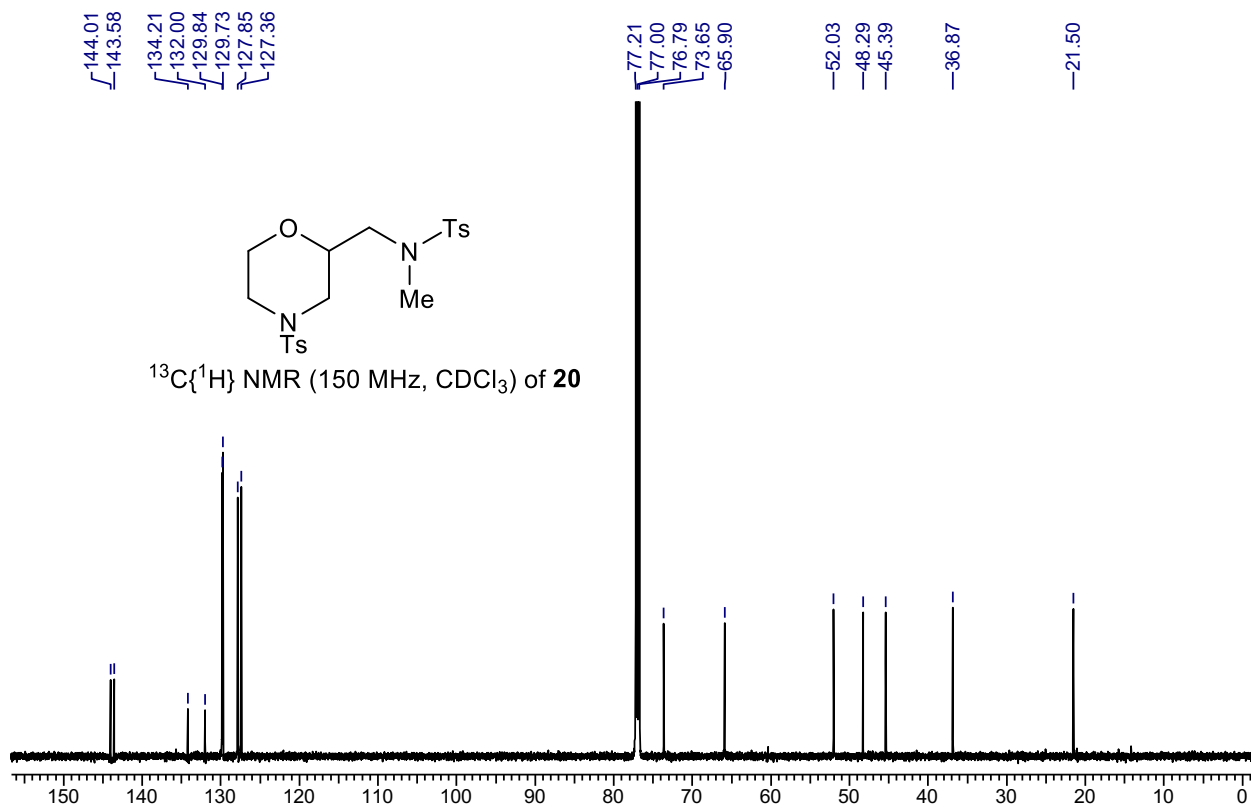



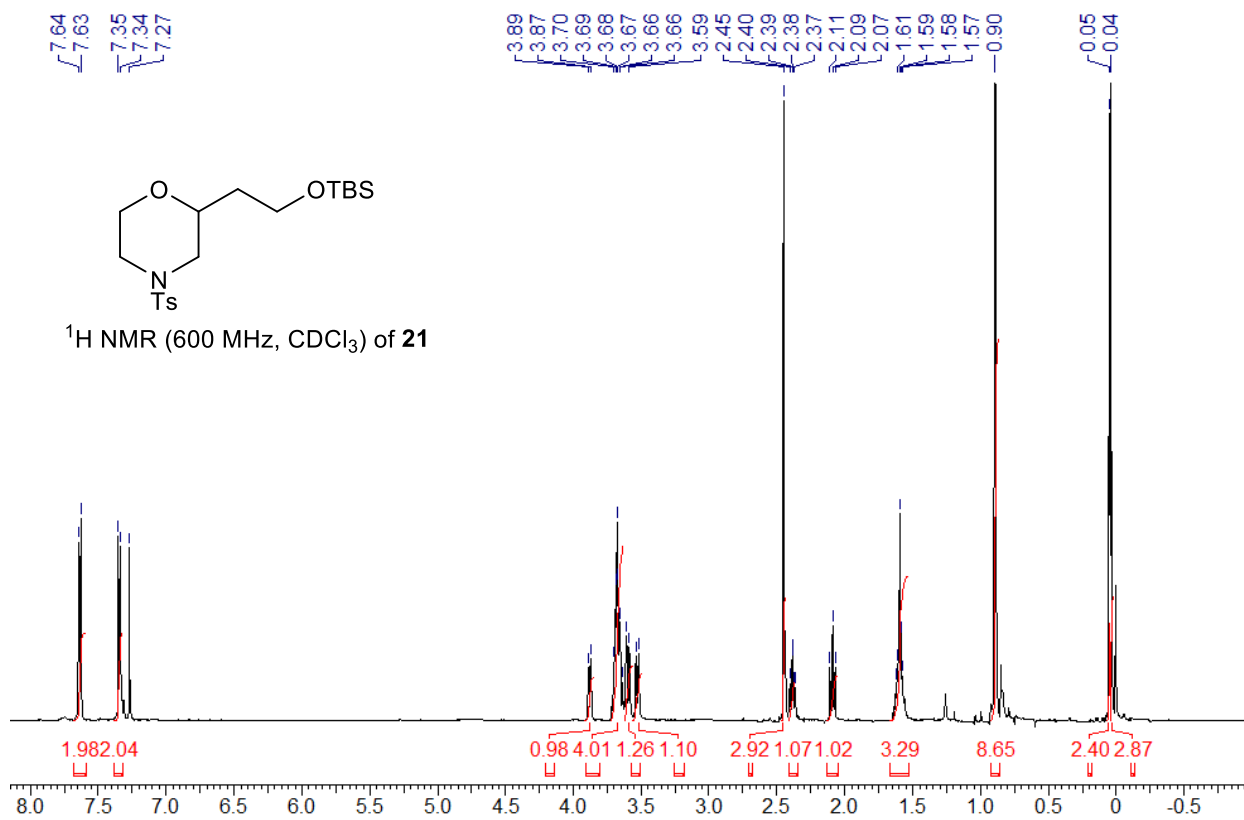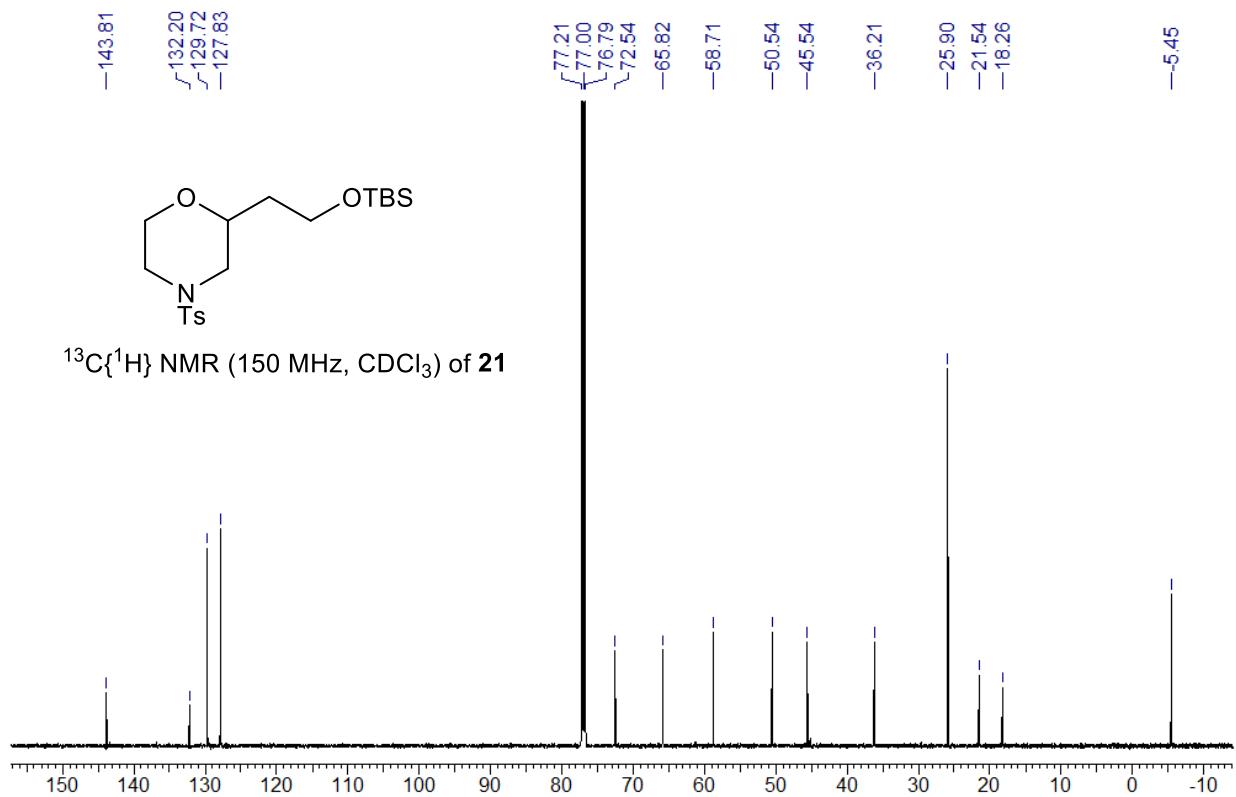

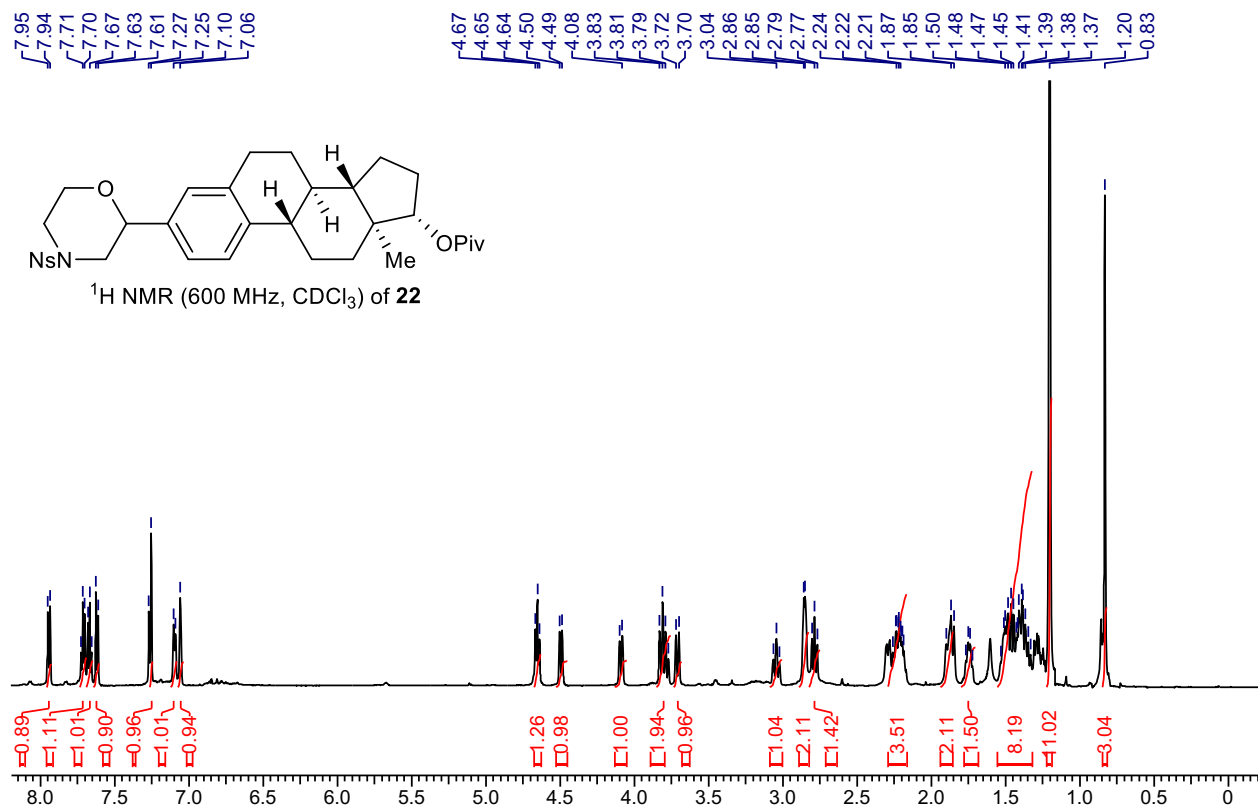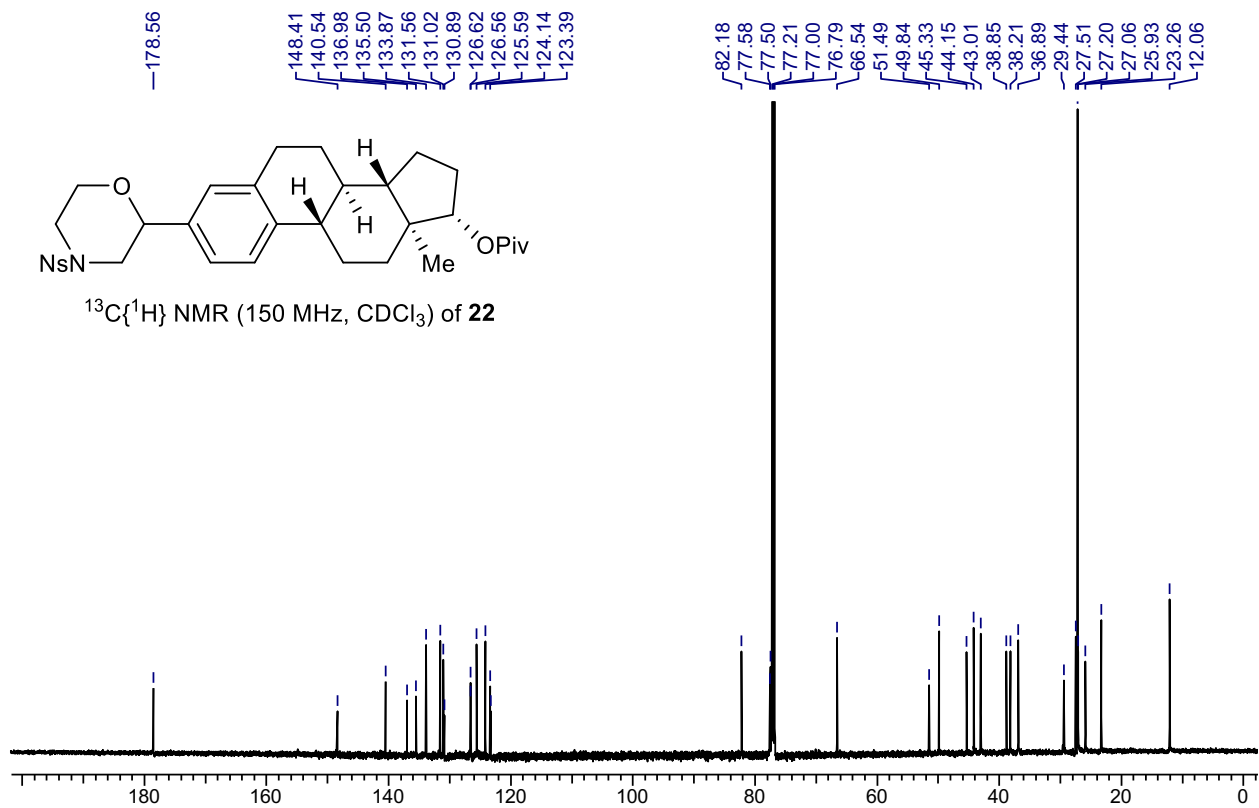

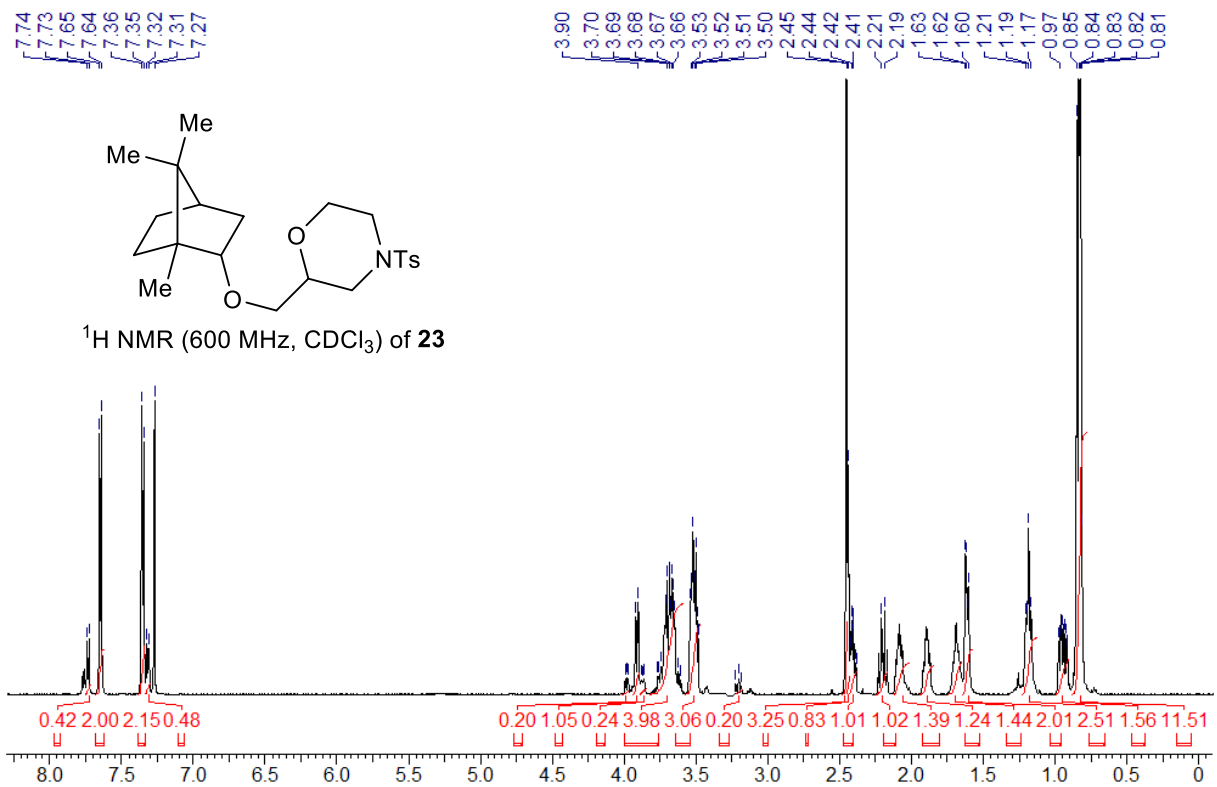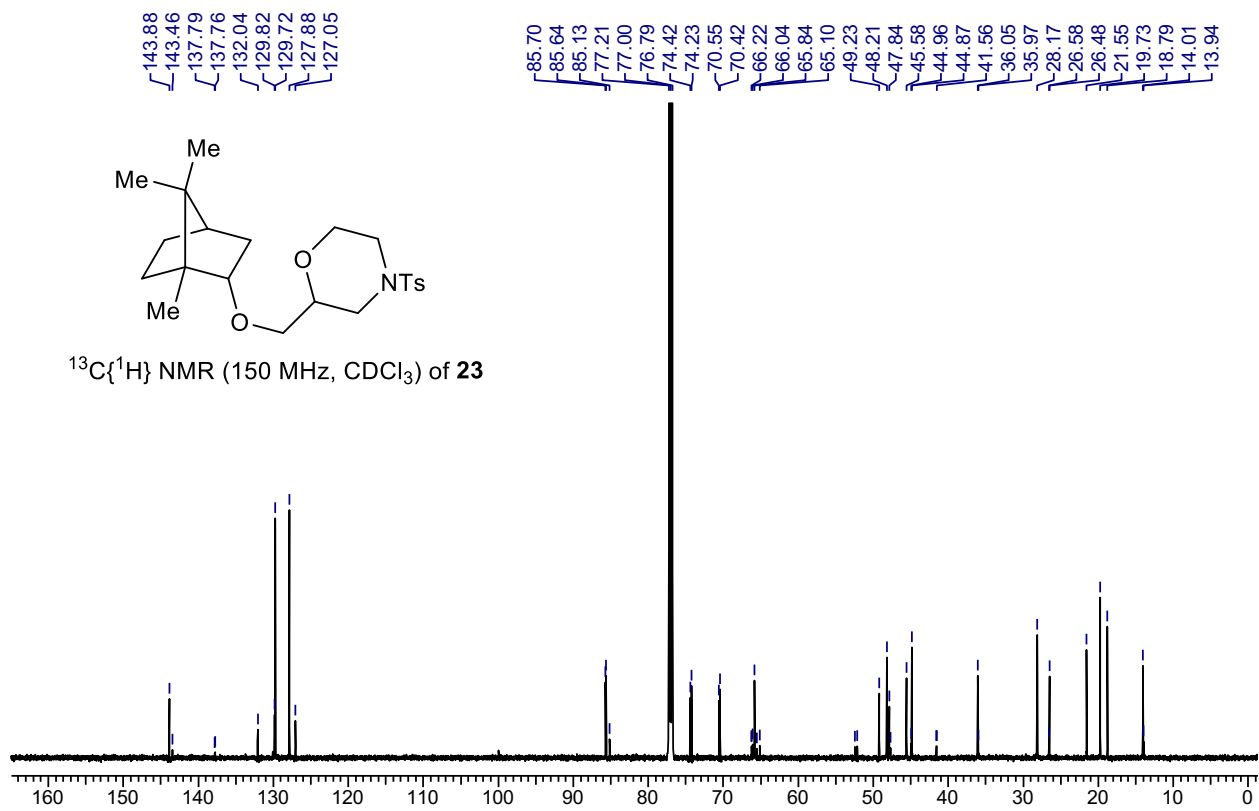

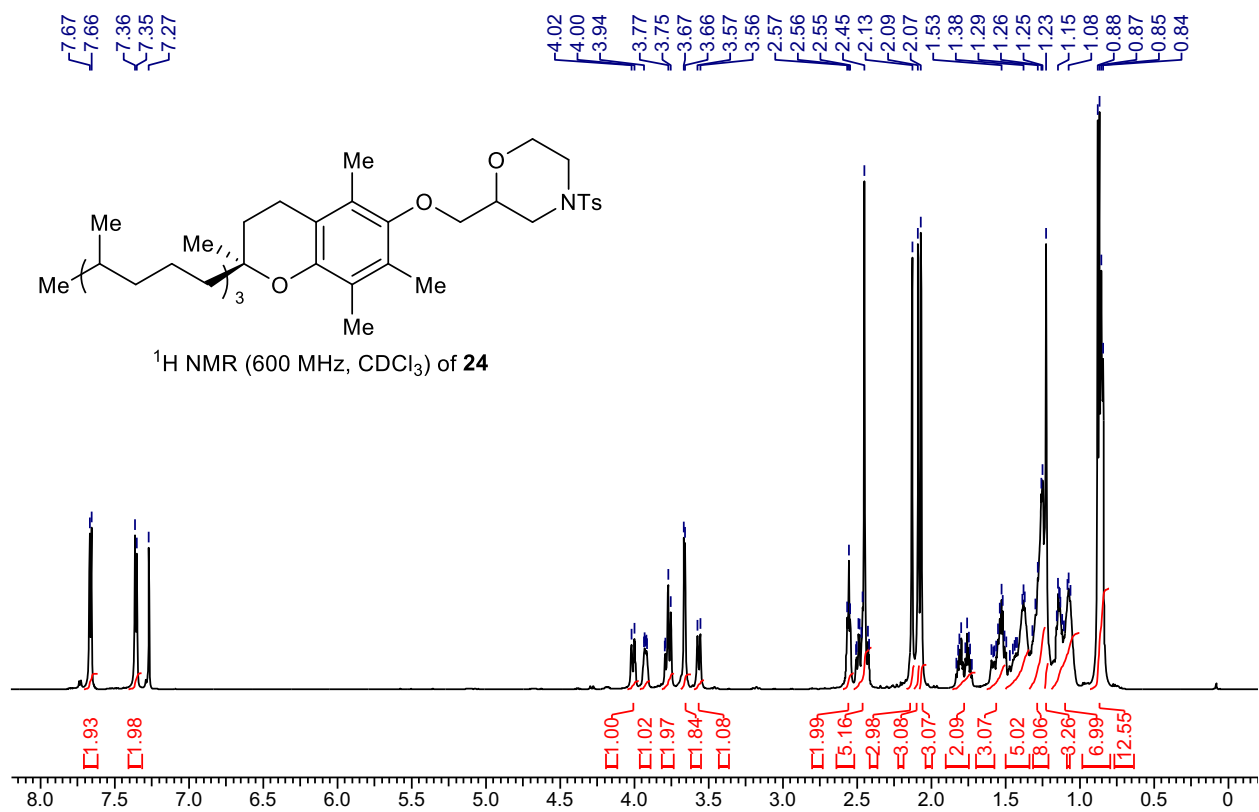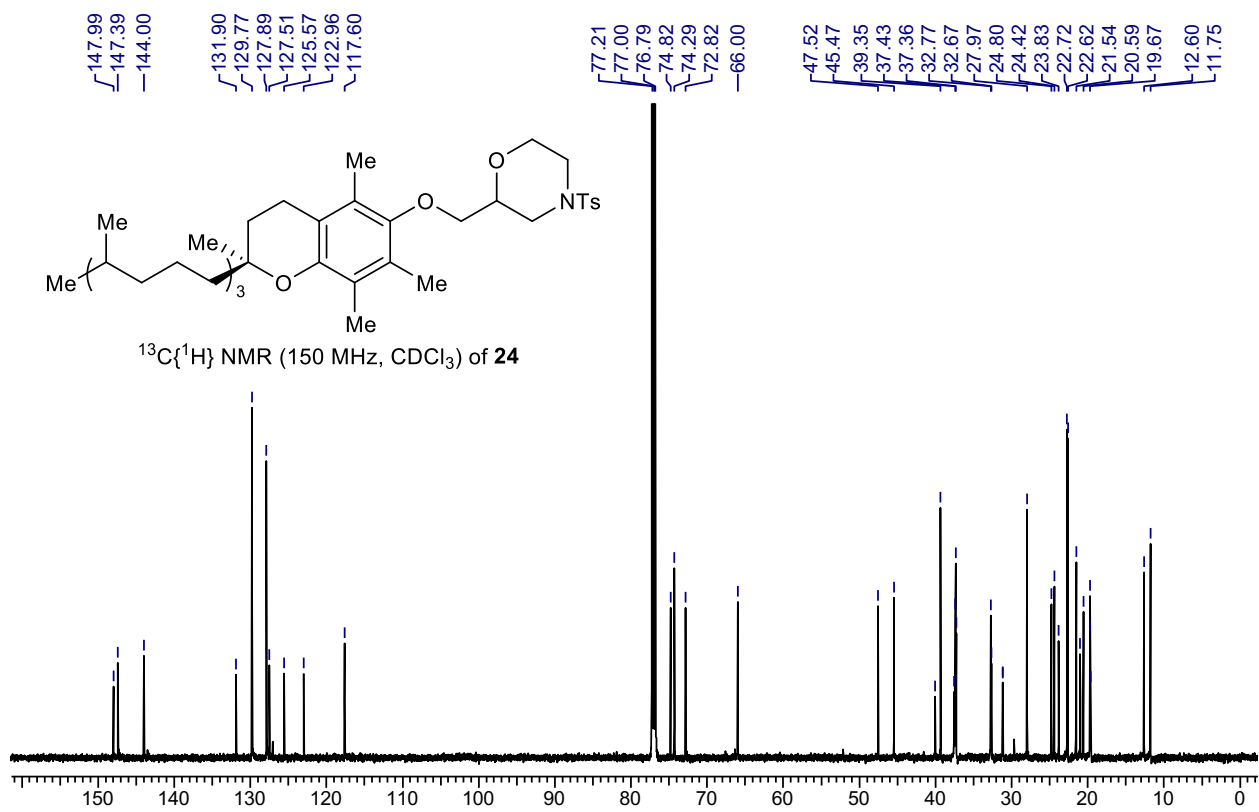

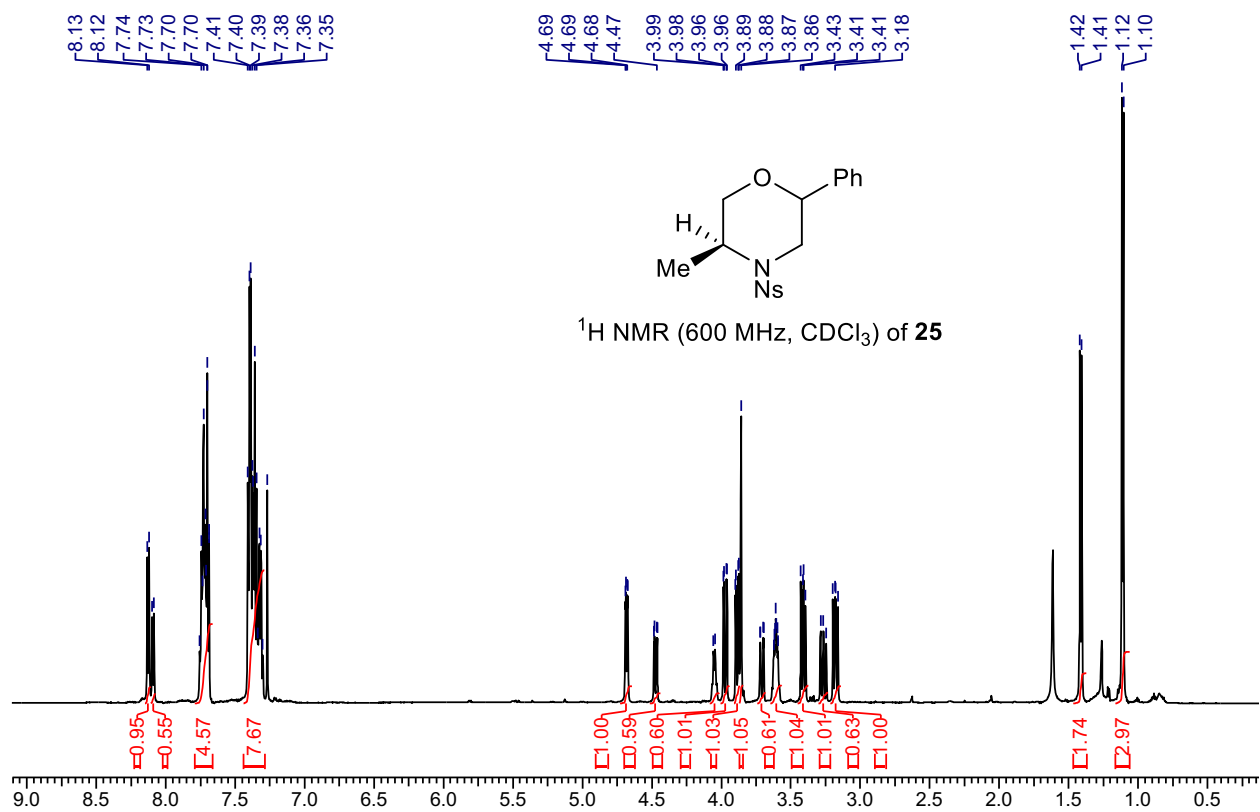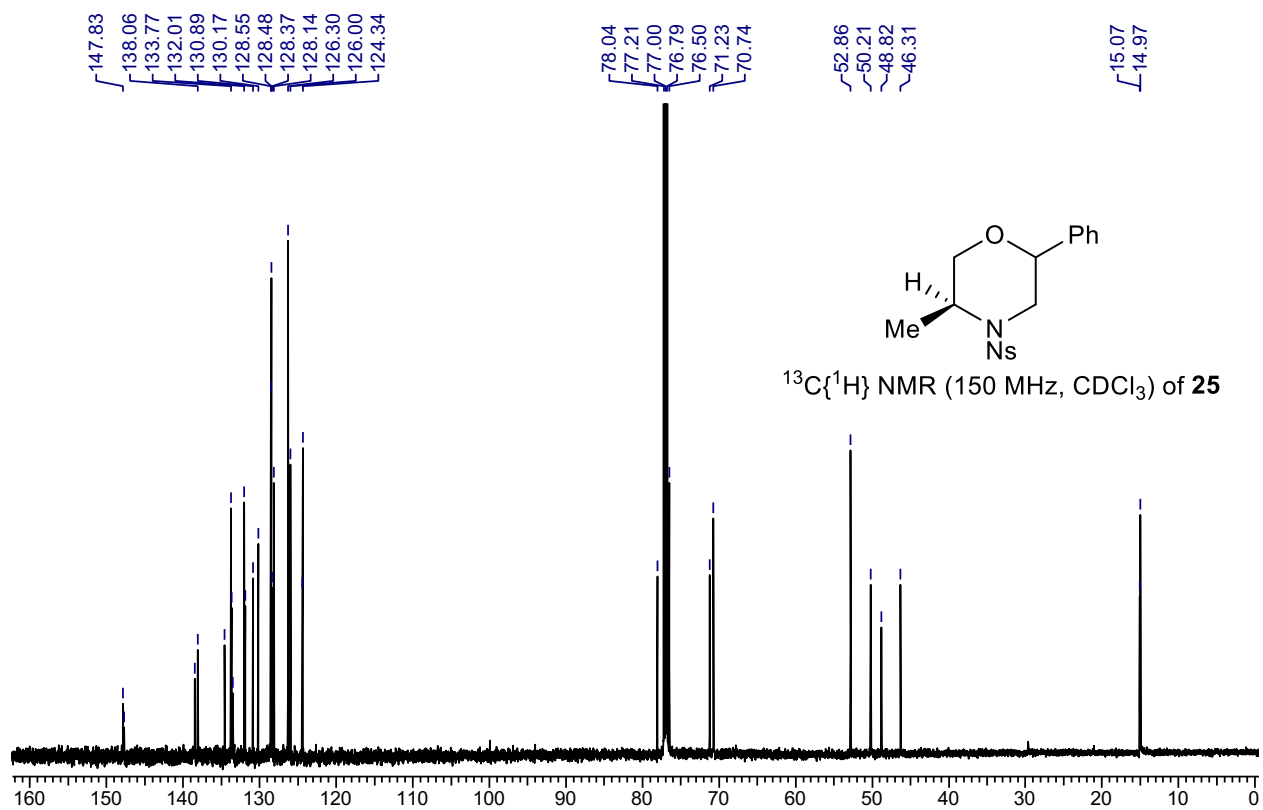

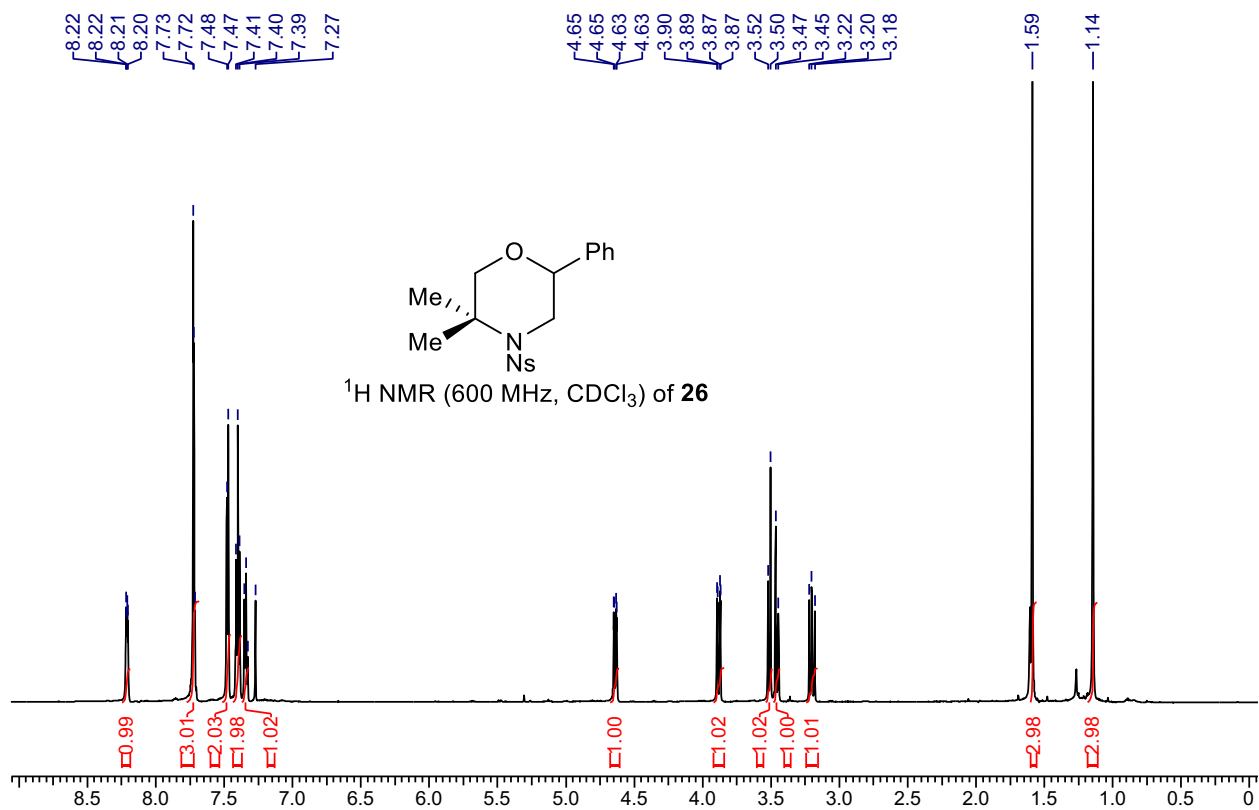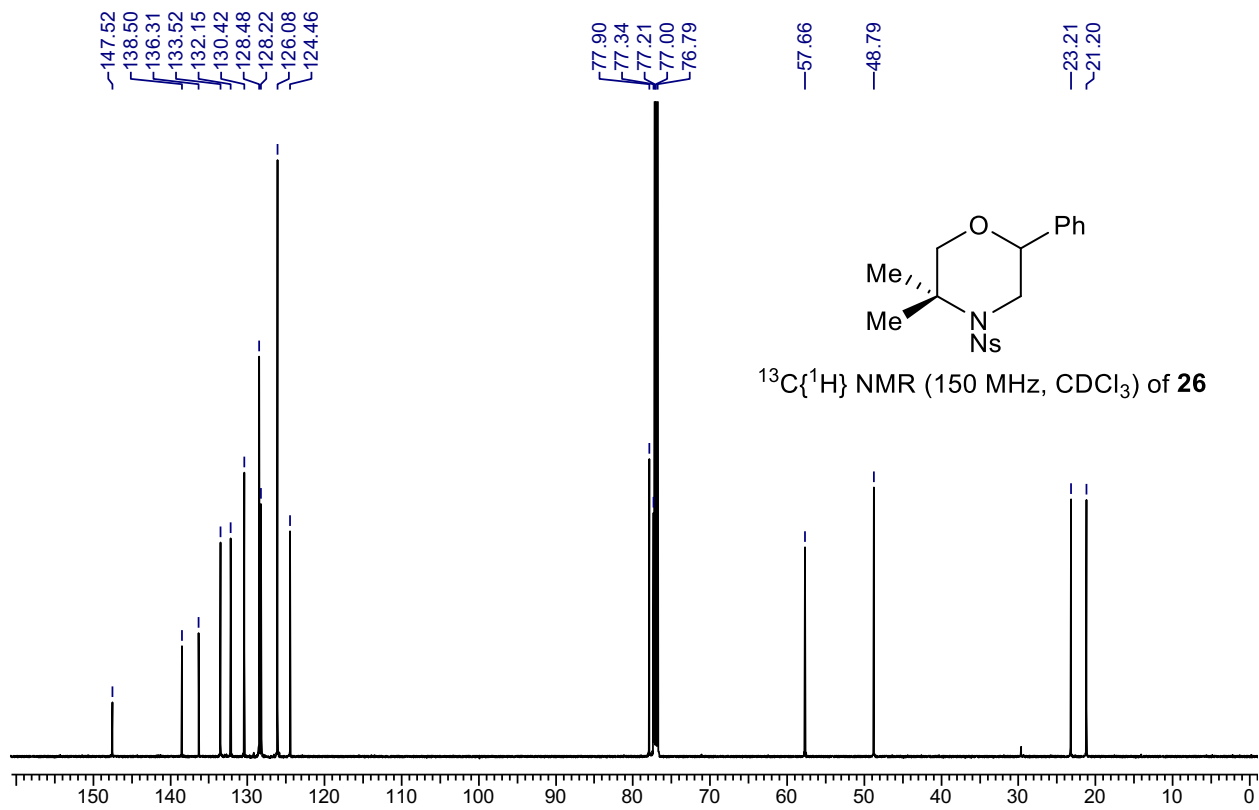

8.07, 8.06, 7.66, 7.42, 7.30, 7.29, 7.26, 7.24, 7.24, 7.22, 7.17, 7.16, 4.91, 4.90, 4.90, 4.51, 4.50, 4.01, 4.00, 3.99, 3.98, 3.86, 3.86, 3.83, 3.73, 3.71, 3.47, 3.01, 2.99, 2.96, 2.95

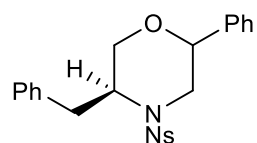

$^1\text{H}$  NMR (600 MHz,  $\text{CDCl}_3$ ) of **27**

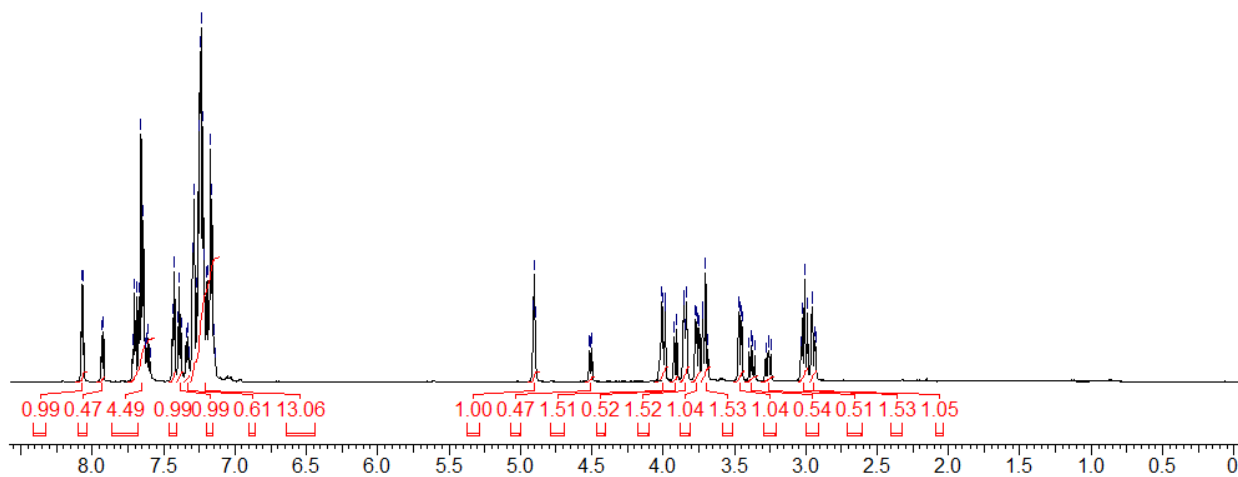

147.75, 137.03, 133.78, 131.94, 130.66, 129.47, 129.31, 128.66, 128.57, 128.43, 127.82, 126.53, 124.45

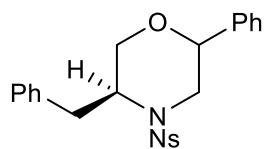

$^{13}\text{C}\{^1\text{H}\}$  NMR (150 MHz,  $\text{CDCl}_3$ ) of **27**

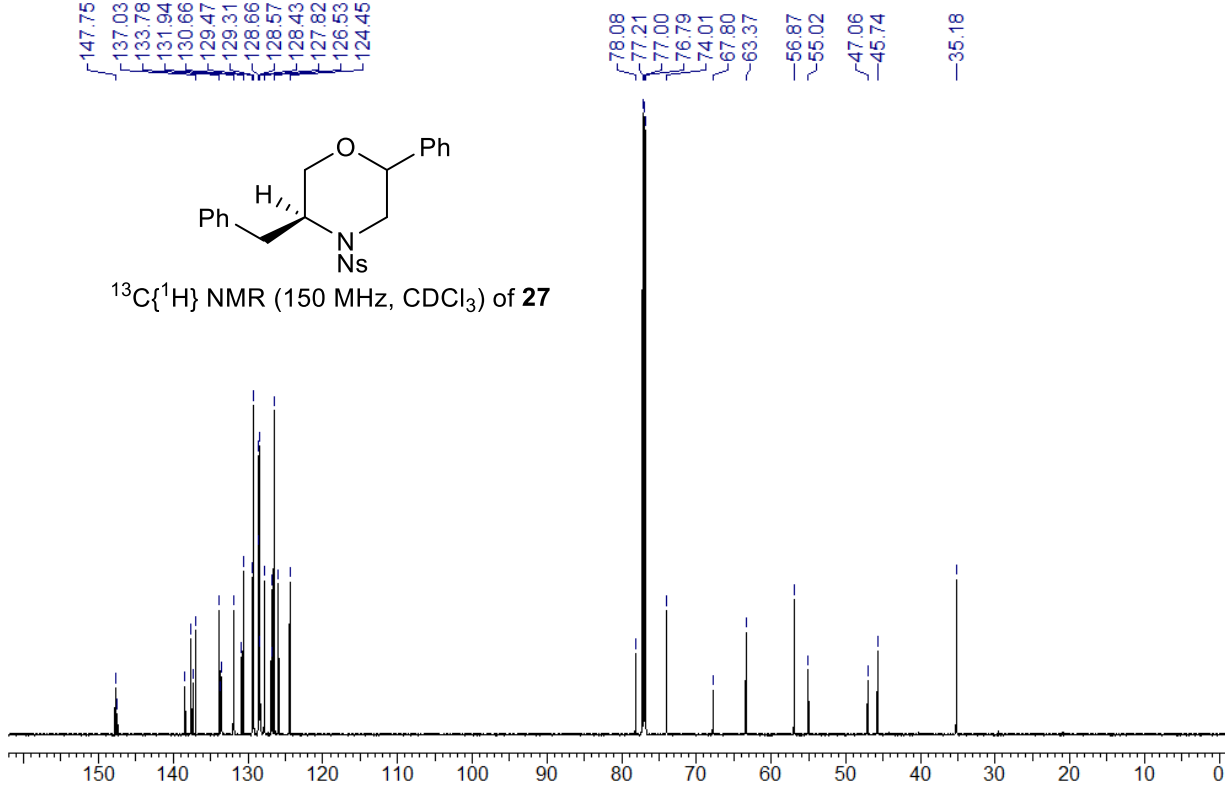

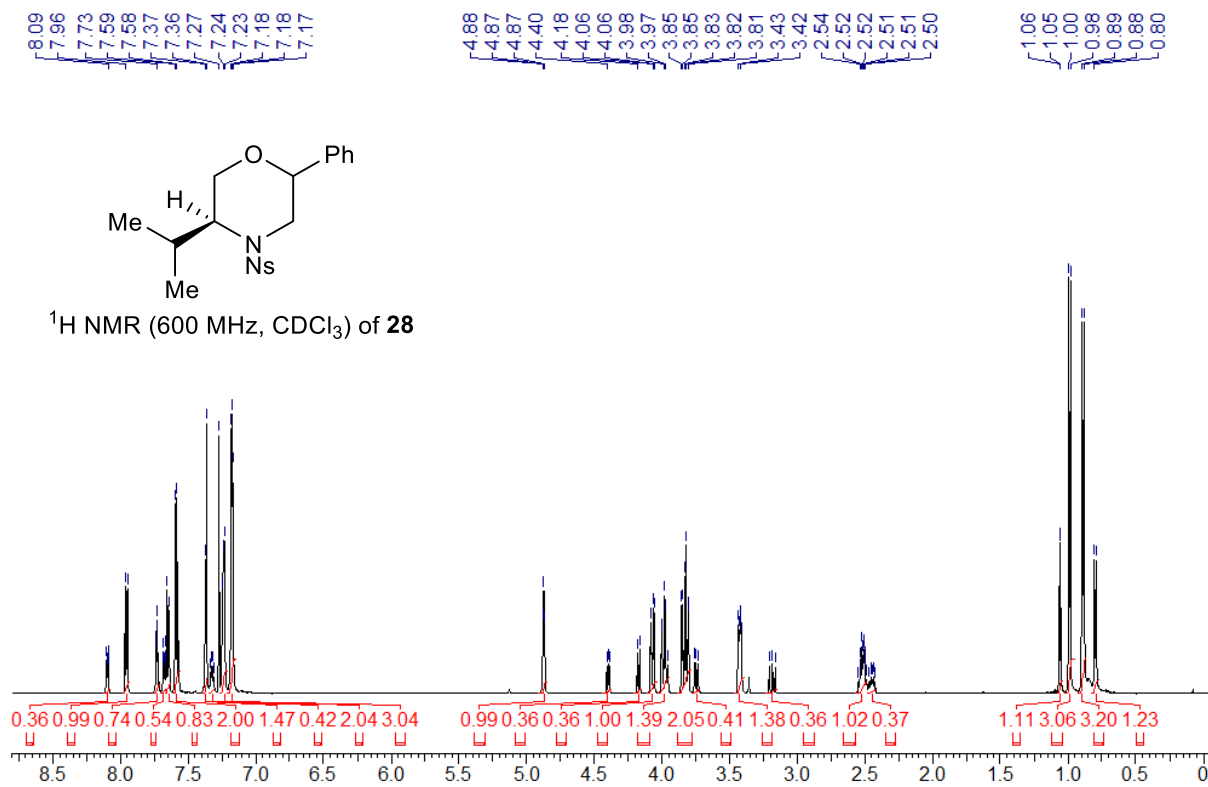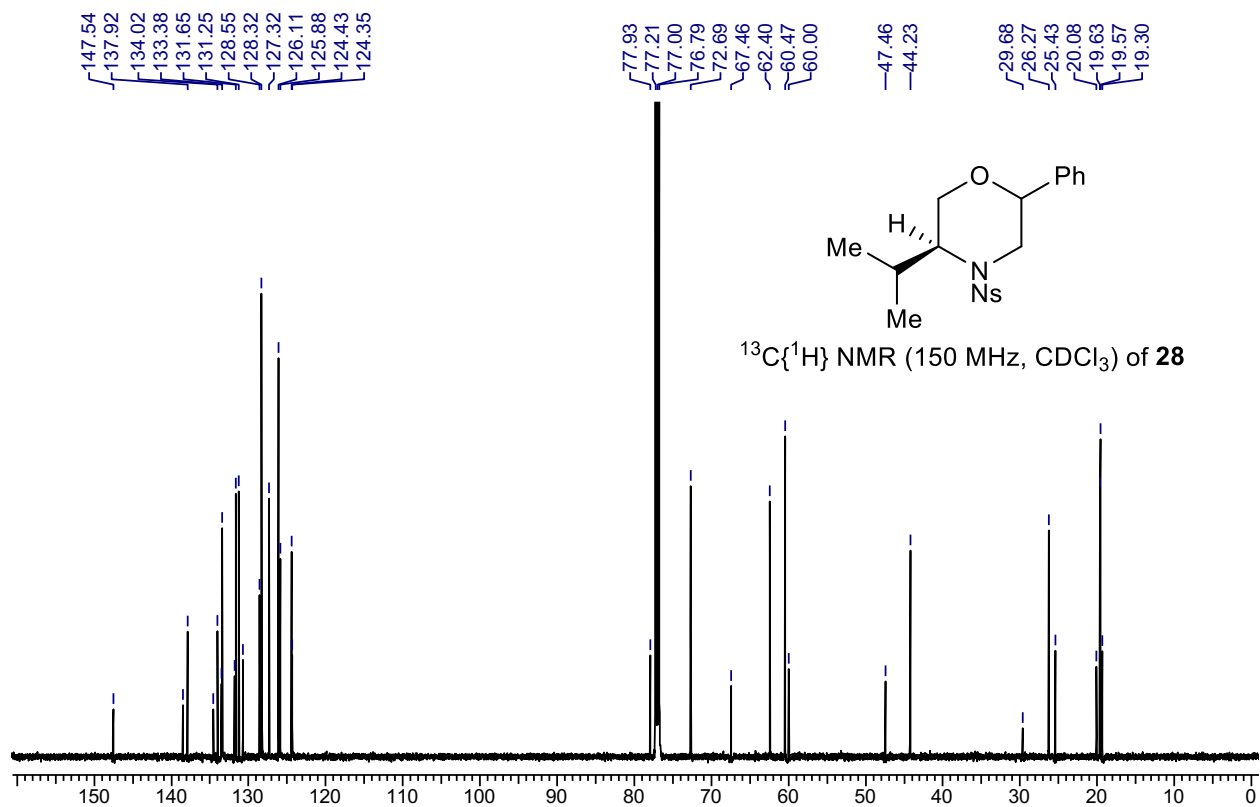



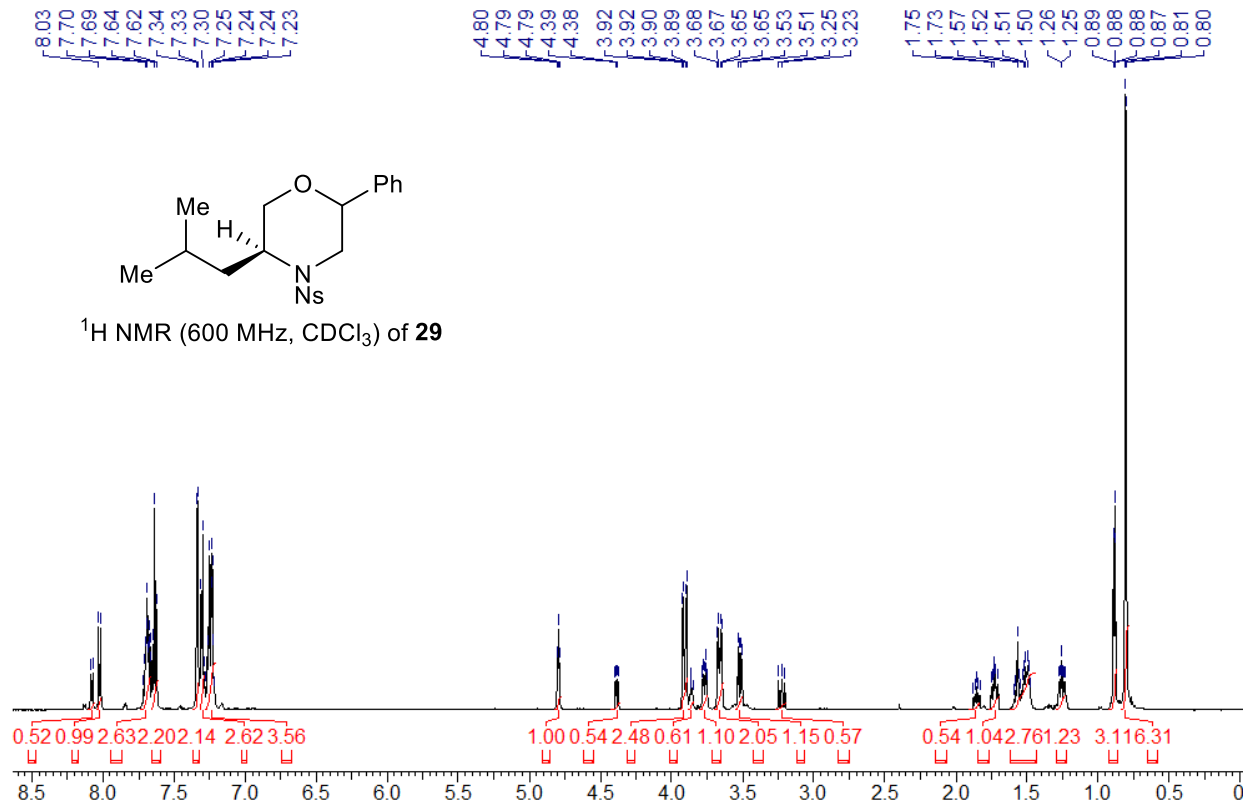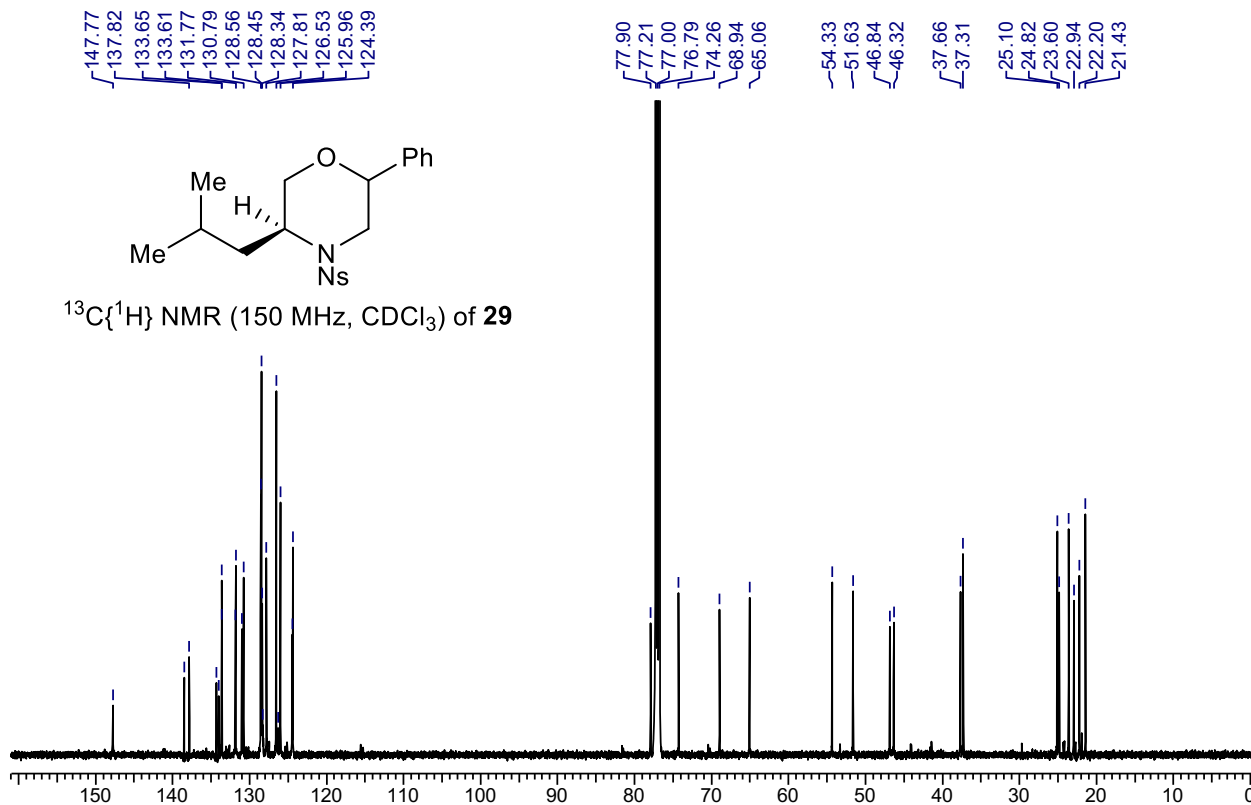

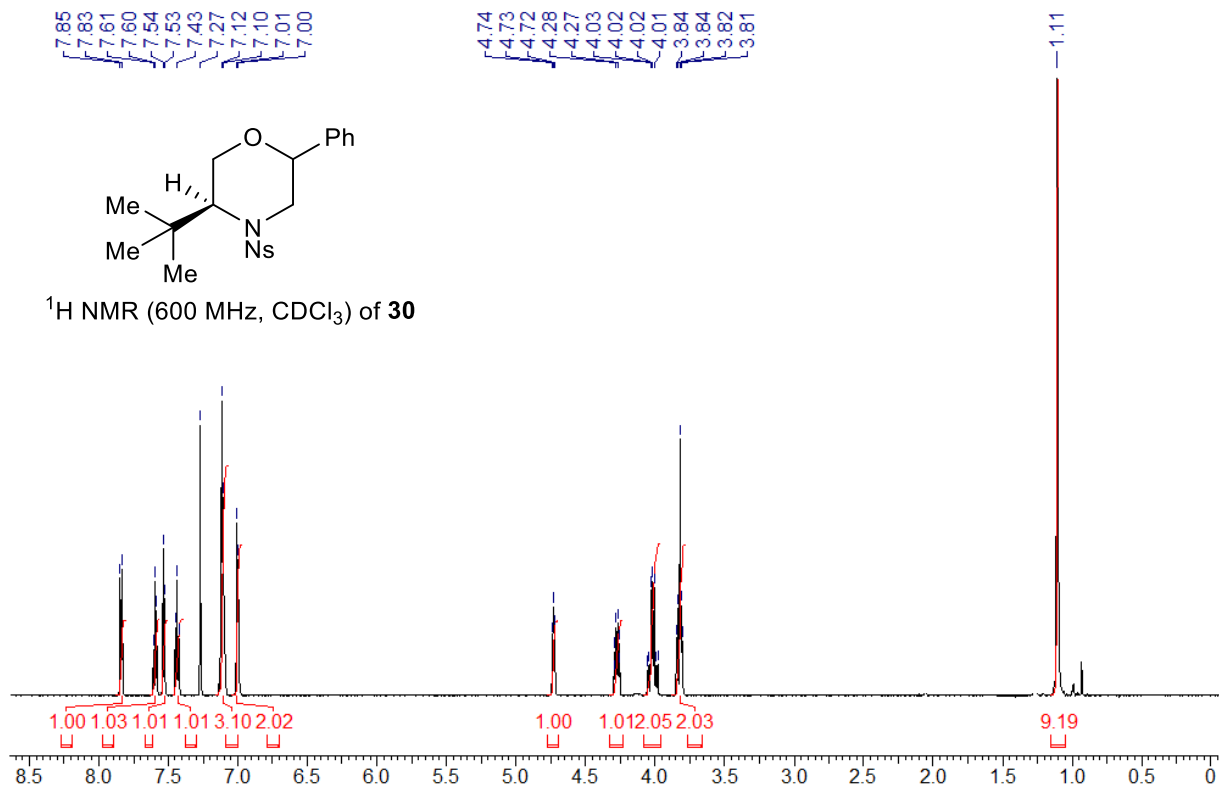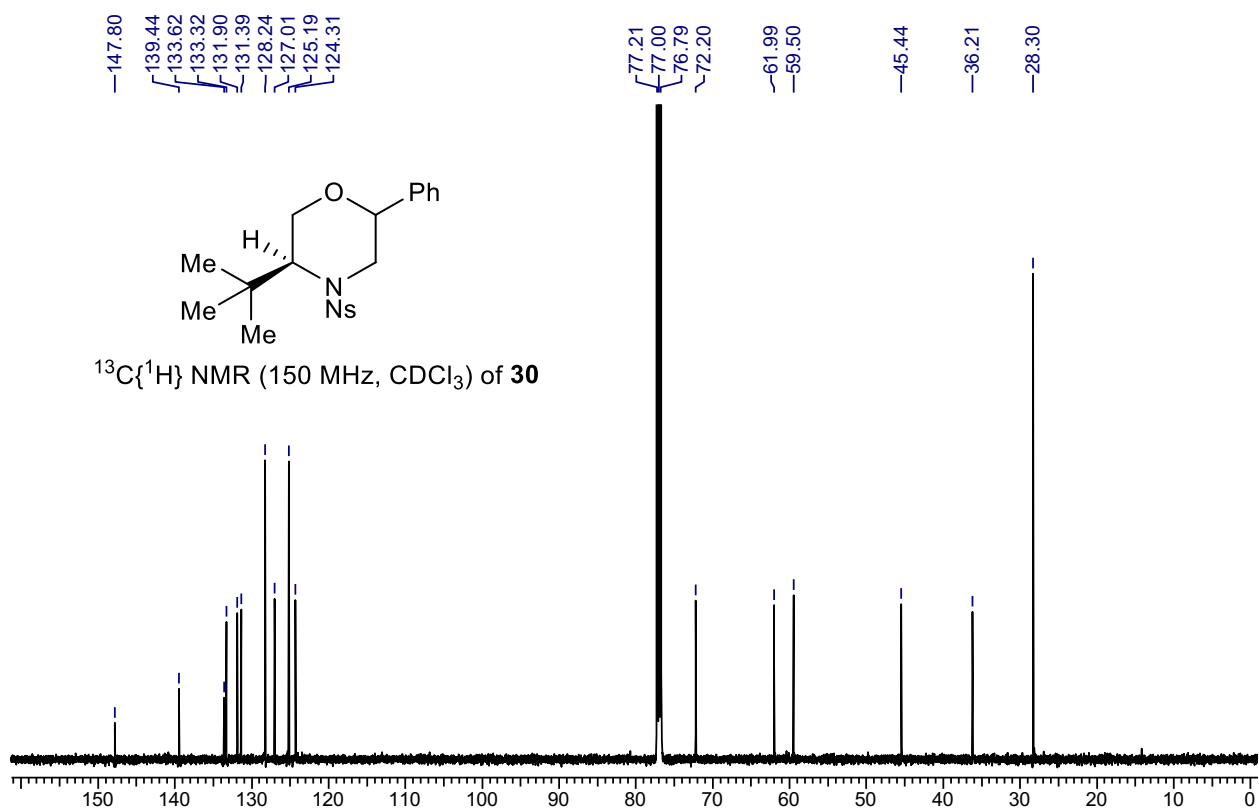

8.04  
7.91  
7.90  
7.62  
7.57  
7.54  
7.33  
7.23  
7.21  
7.17  
7.17  
7.16

4.81  
4.80  
4.36  
4.14  
4.04  
4.03  
4.02  
3.82  
3.81  
3.80  
3.79  
3.78  
3.77  
3.48  
3.47  
2.18  
2.17  
2.17  
2.16  
2.16  
2.15  
1.51  
1.50  
1.49  
1.49  
0.99  
0.88  
0.87  
0.85  
0.84  
0.83

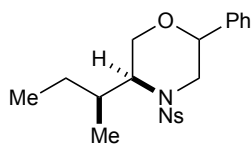

$^1\text{H}$  NMR (600 MHz,  $\text{CDCl}_3$ ) of **31**

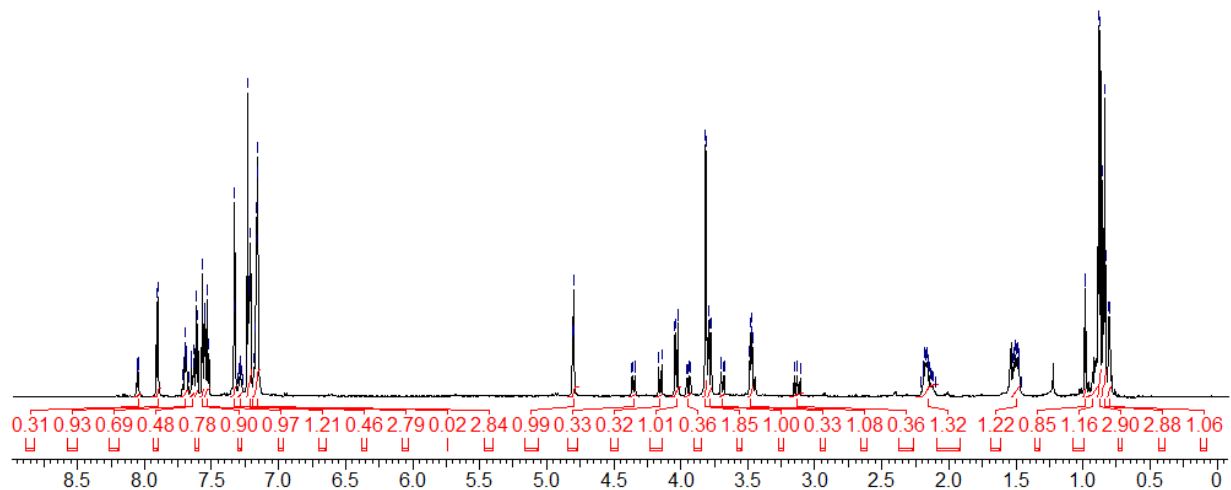

147.68  
138.53  
138.21  
133.54  
133.41  
131.83  
130.75  
128.56  
128.35  
127.46  
126.06  
125.84  
124.39

77.73  
77.21  
77.00  
76.78  
73.42  
67.48  
63.04  
59.89  
58.90  
47.52  
45.74  
33.24  
31.82  
25.79  
24.93  
16.01  
15.42  
11.82  
11.36

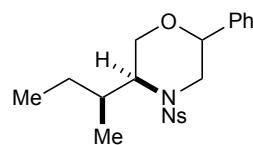

$^{13}\text{C}\{^1\text{H}\}$  NMR (150 MHz,  $\text{CDCl}_3$ ) of **31**

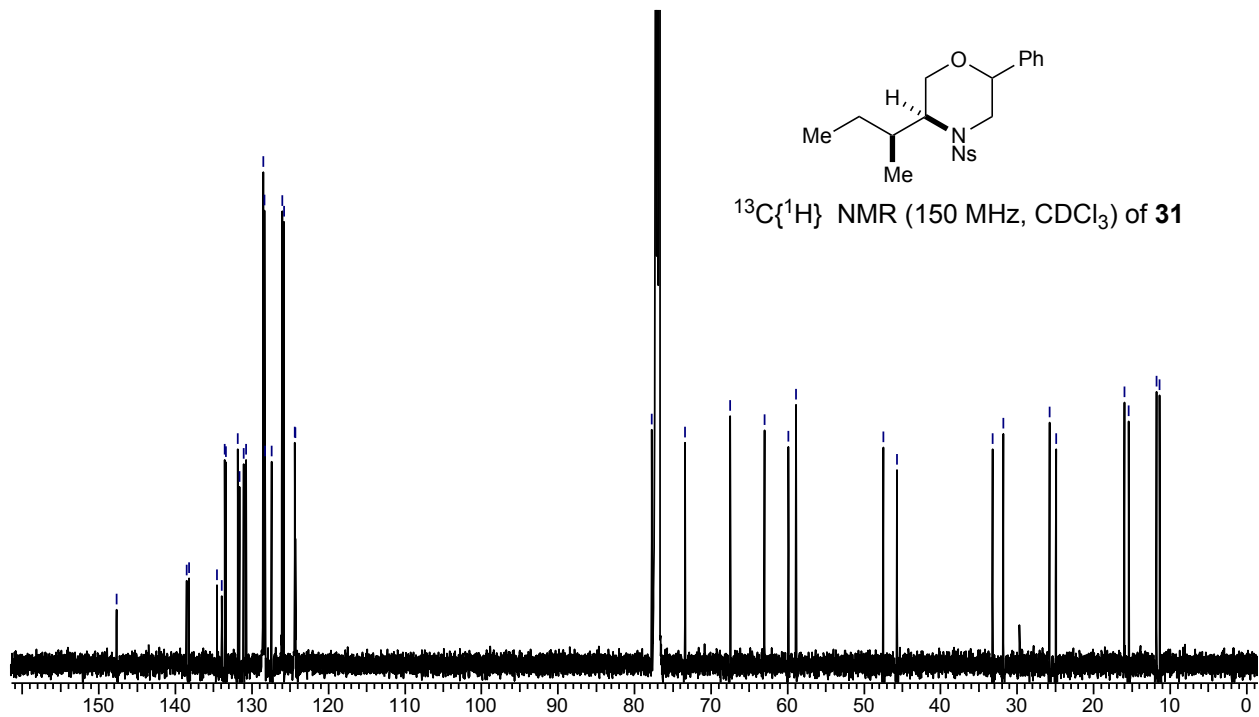

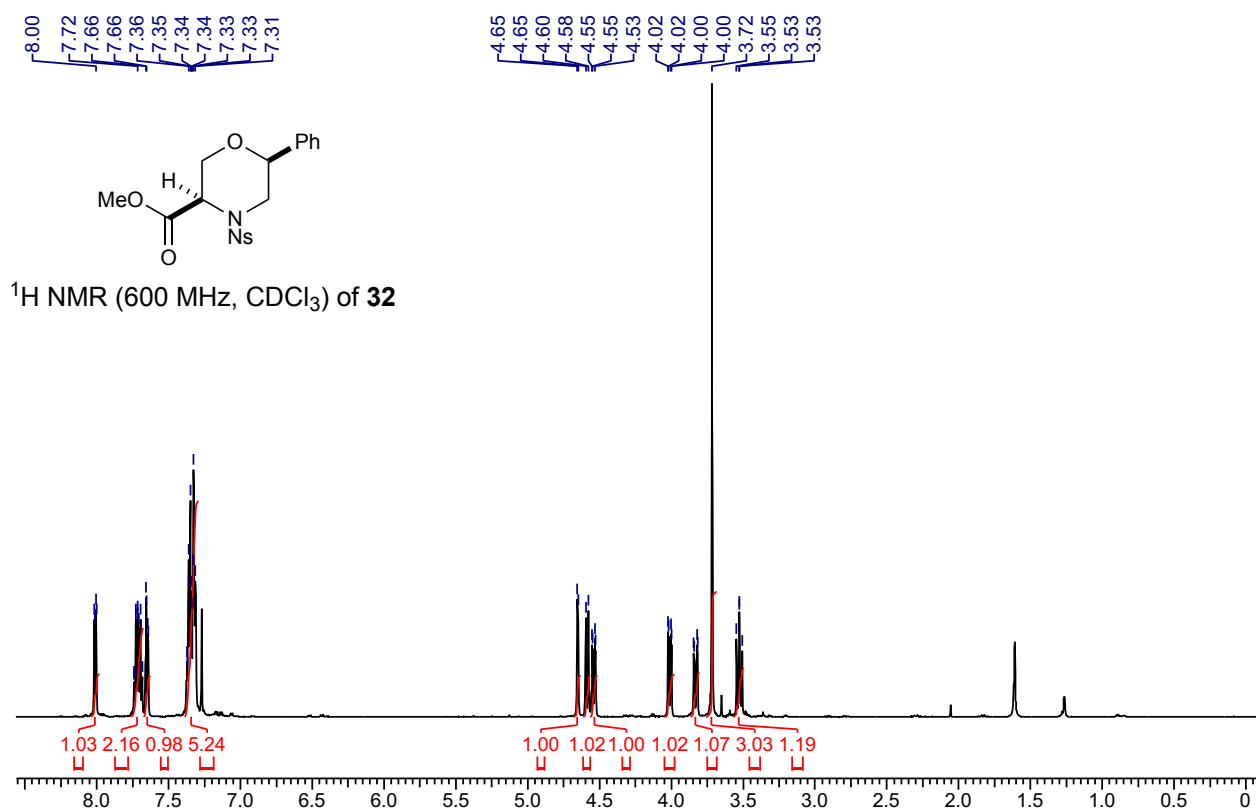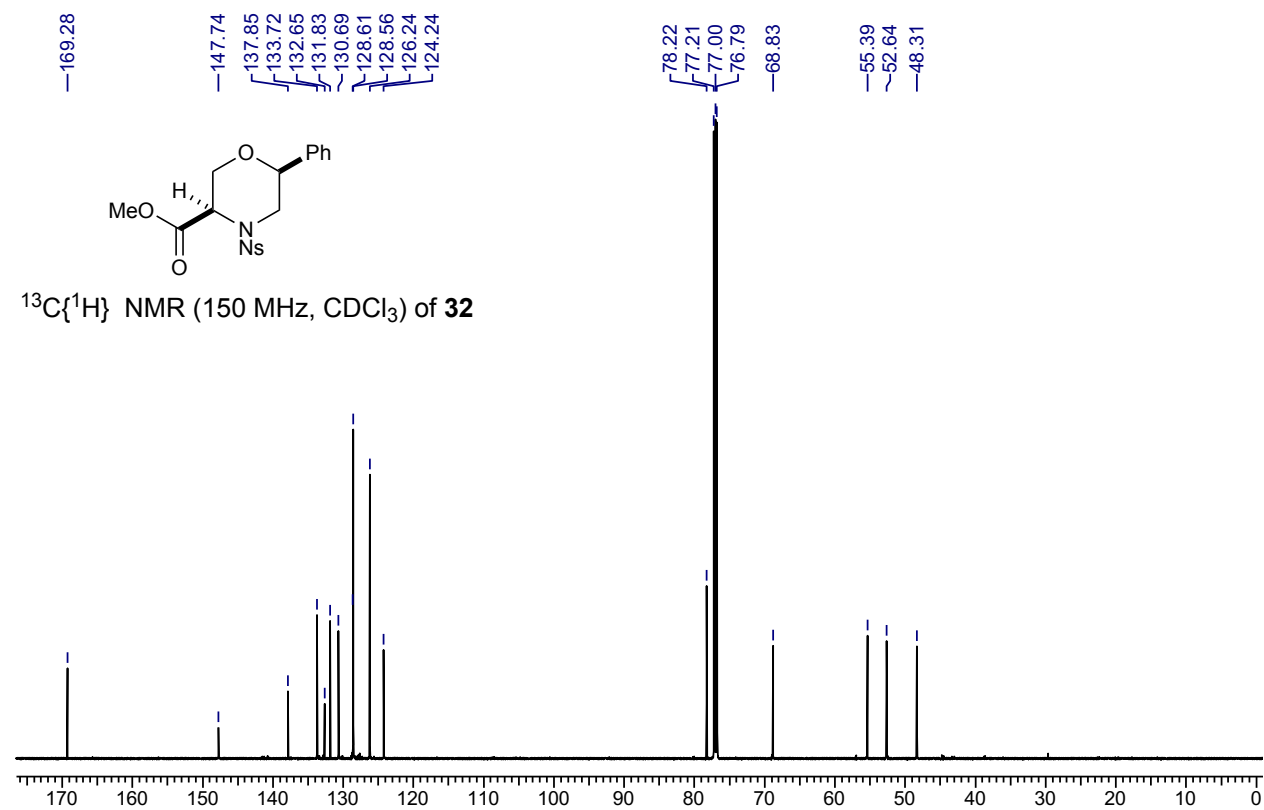

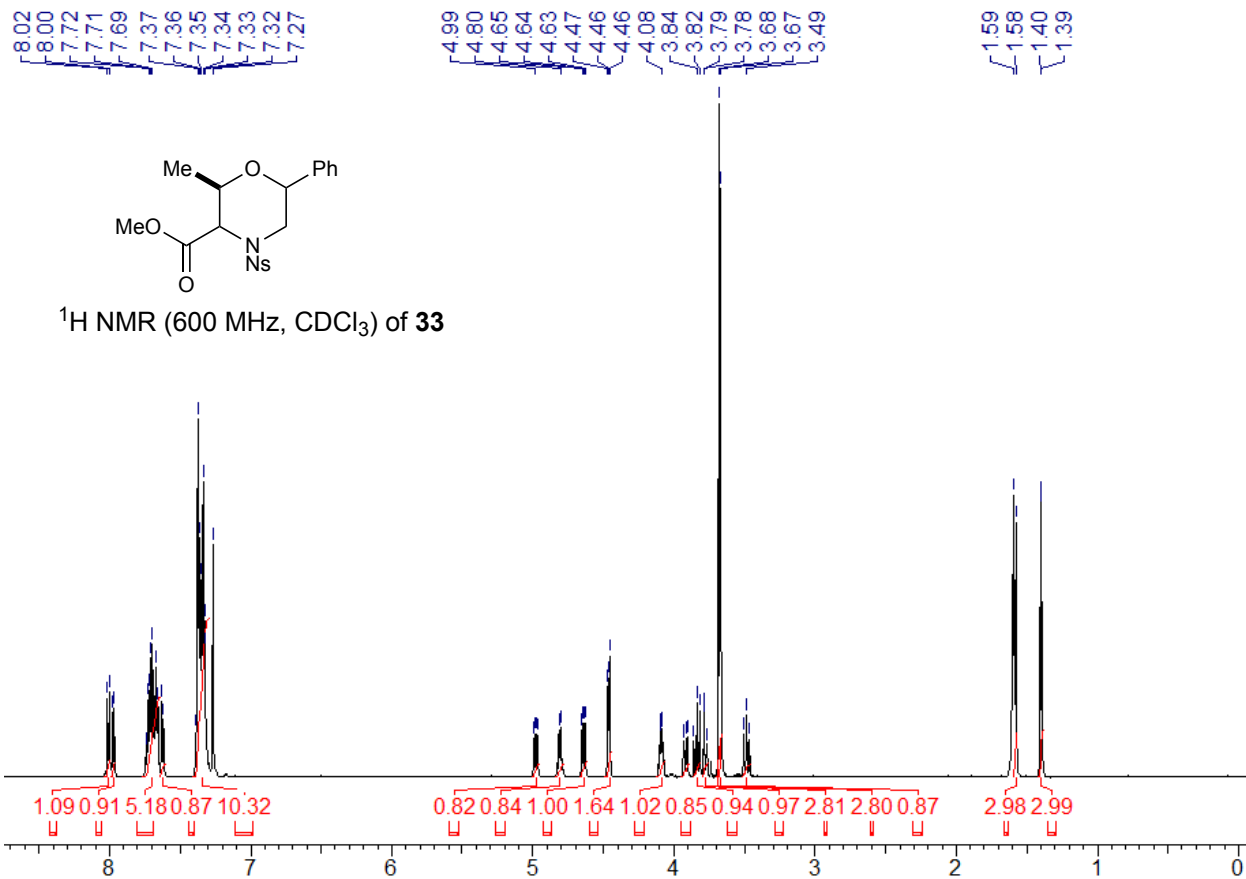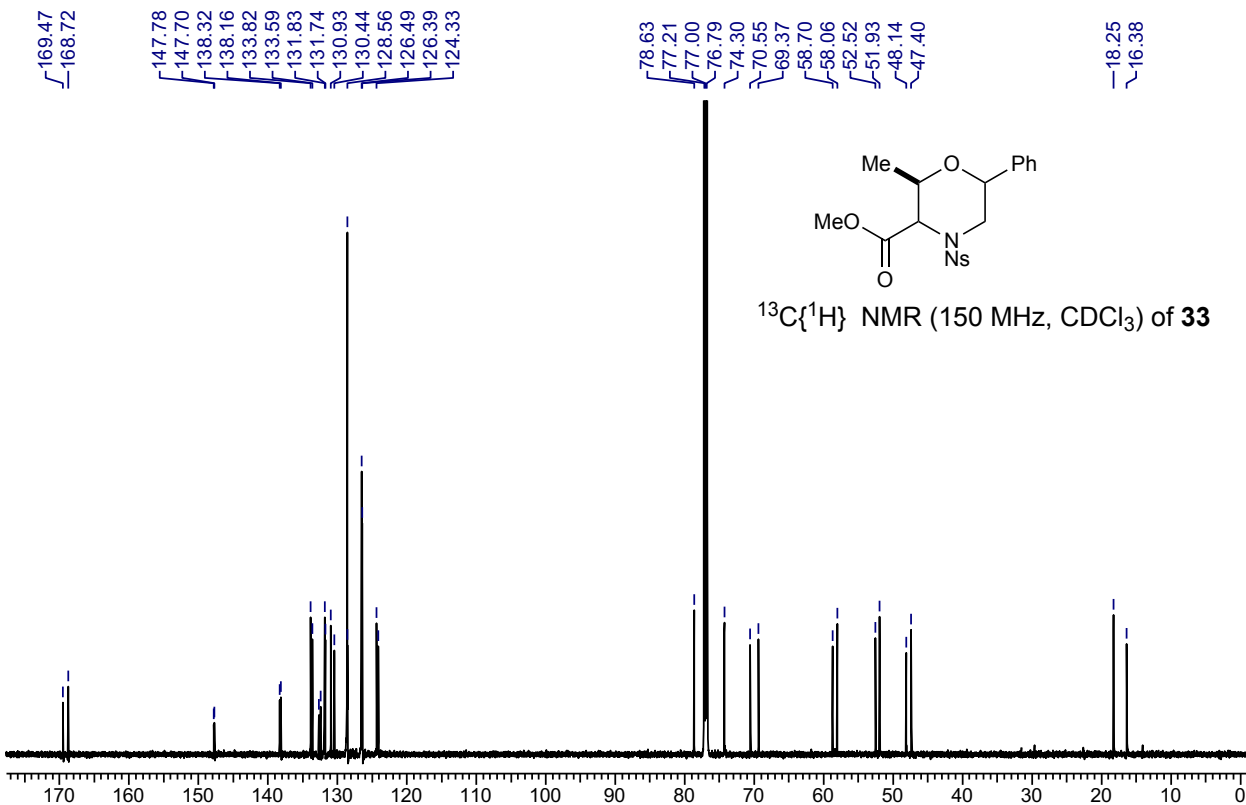

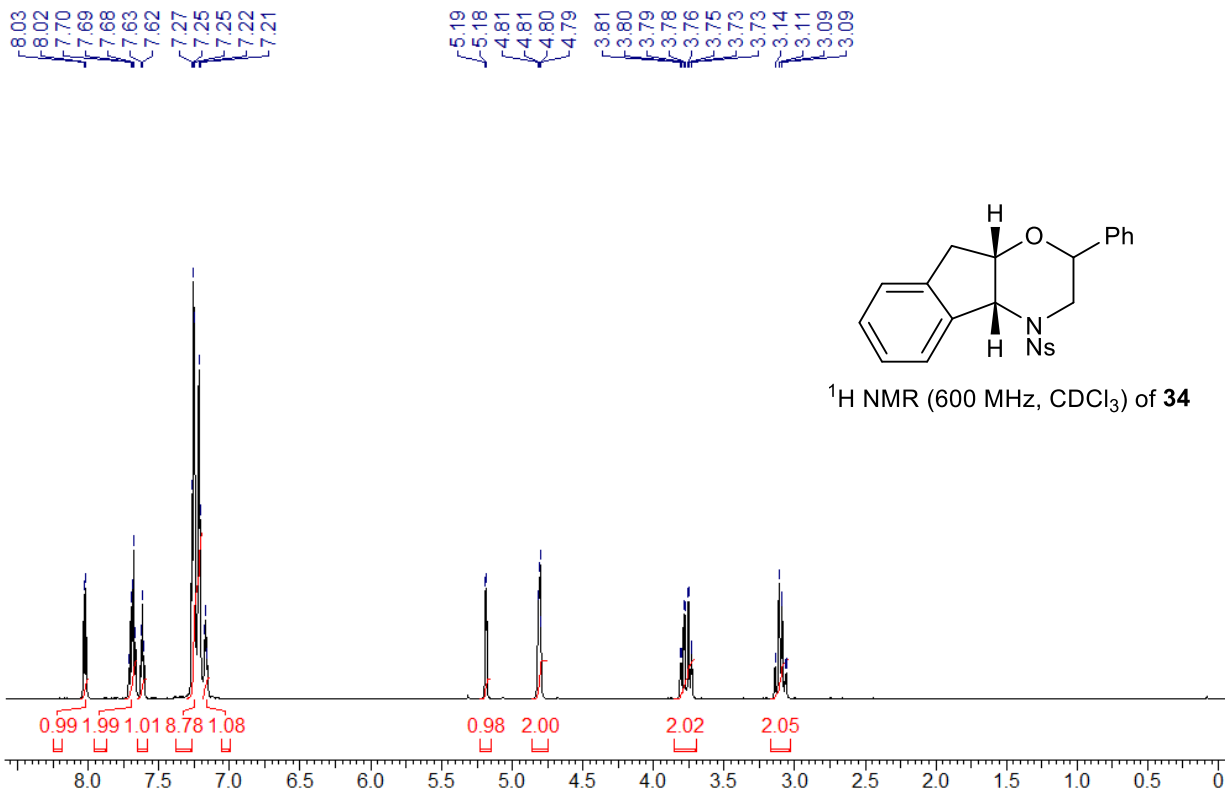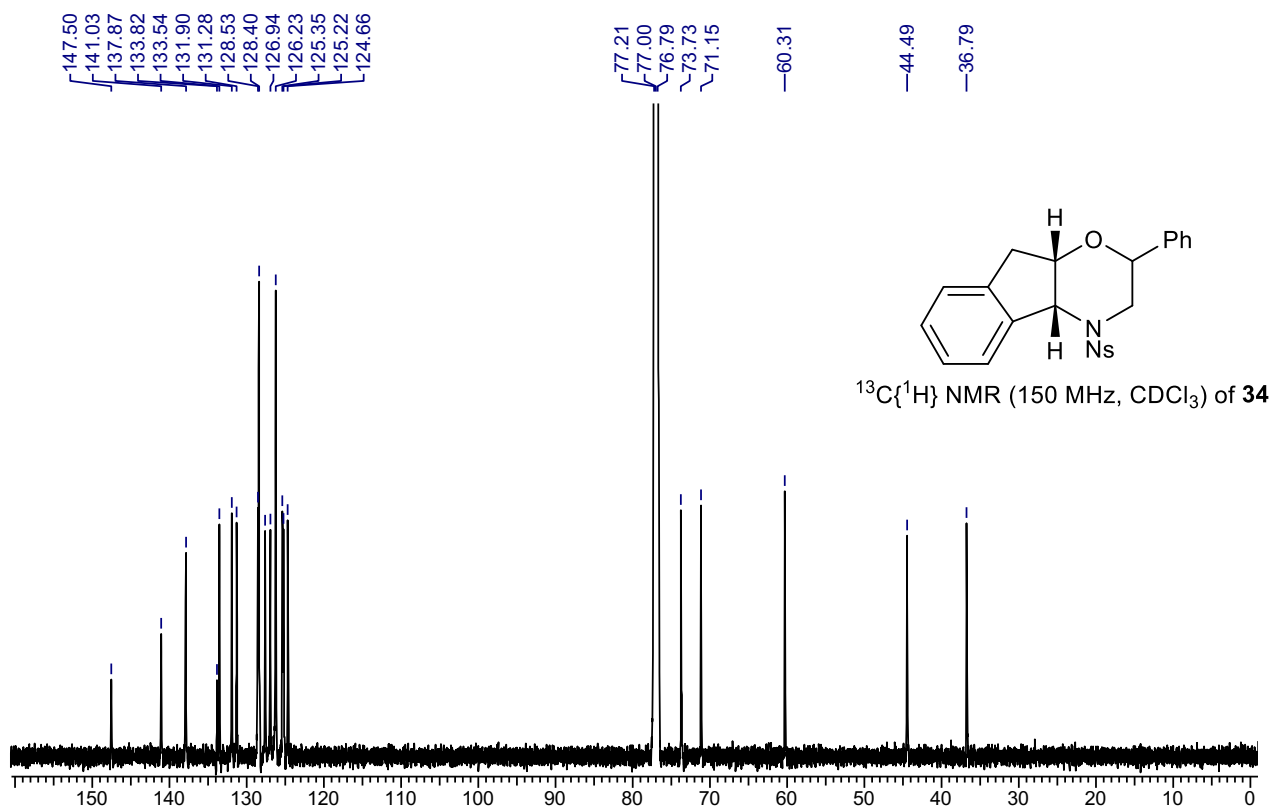

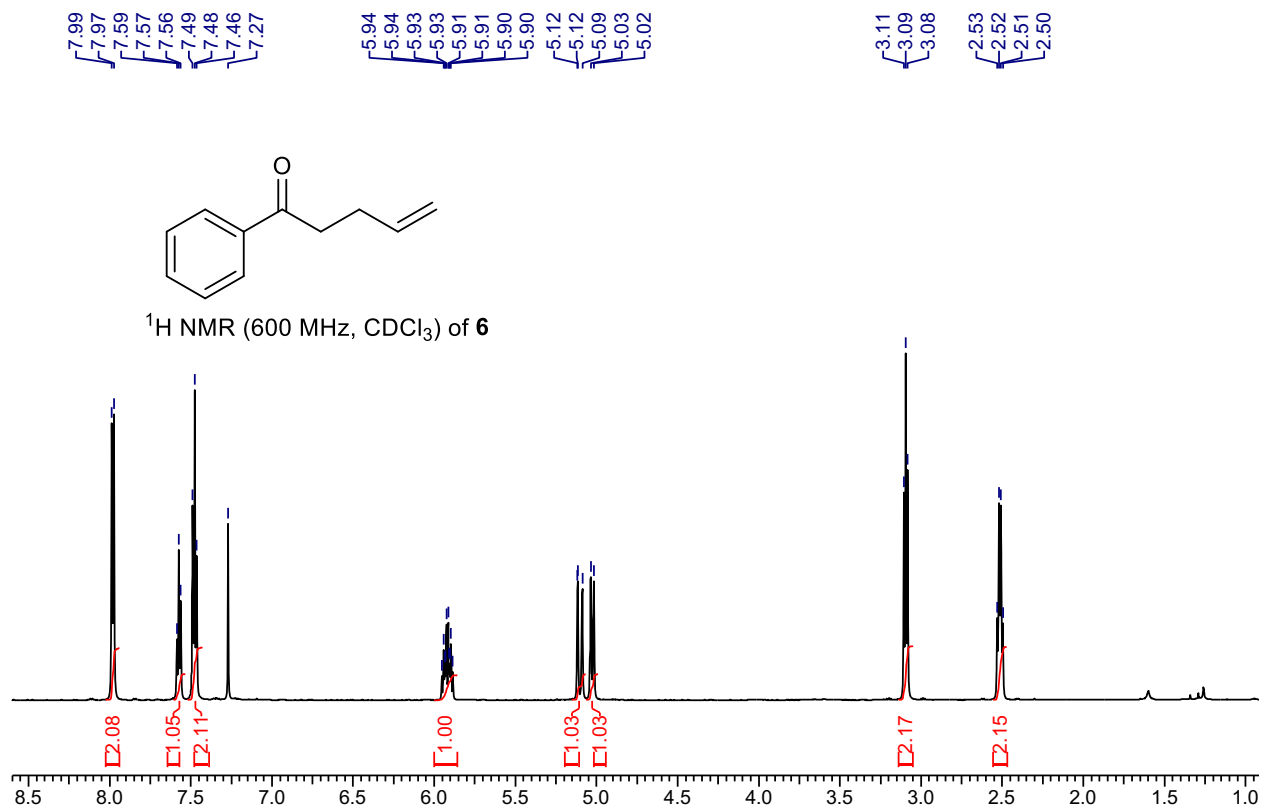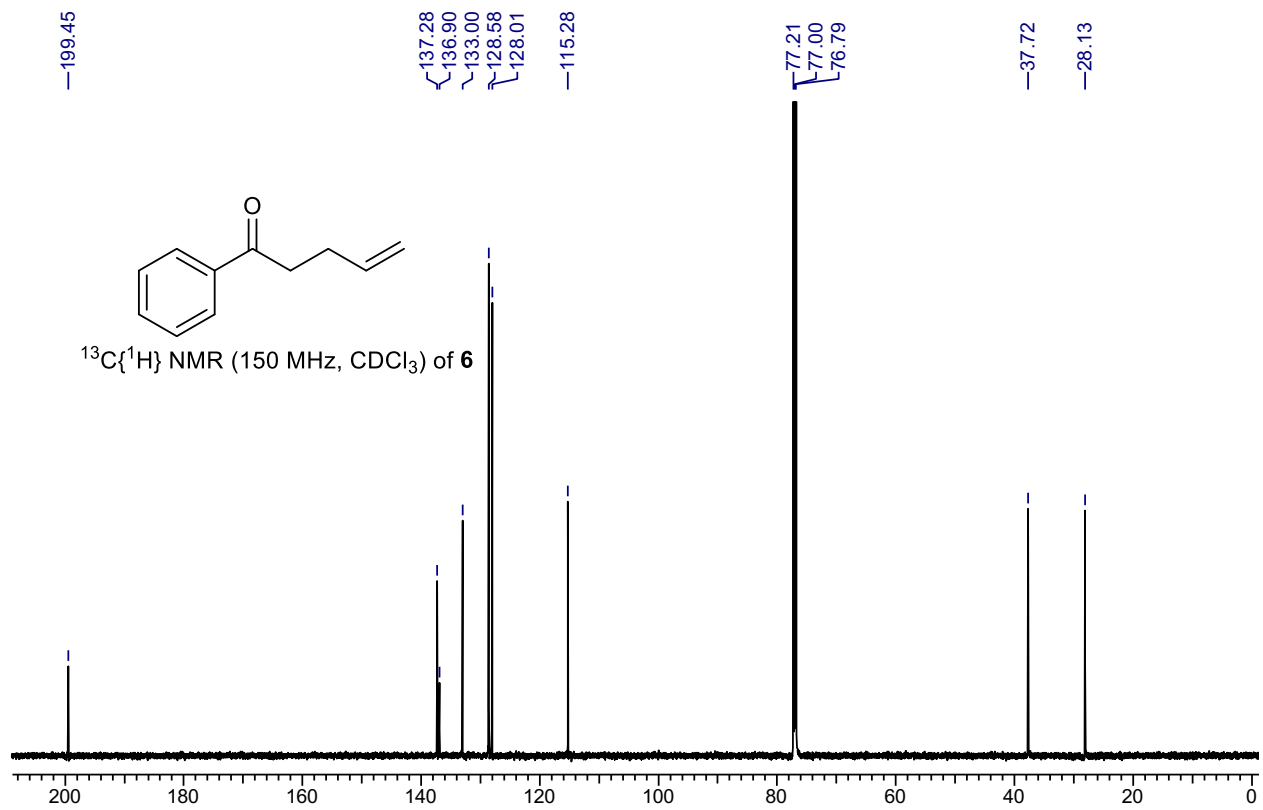

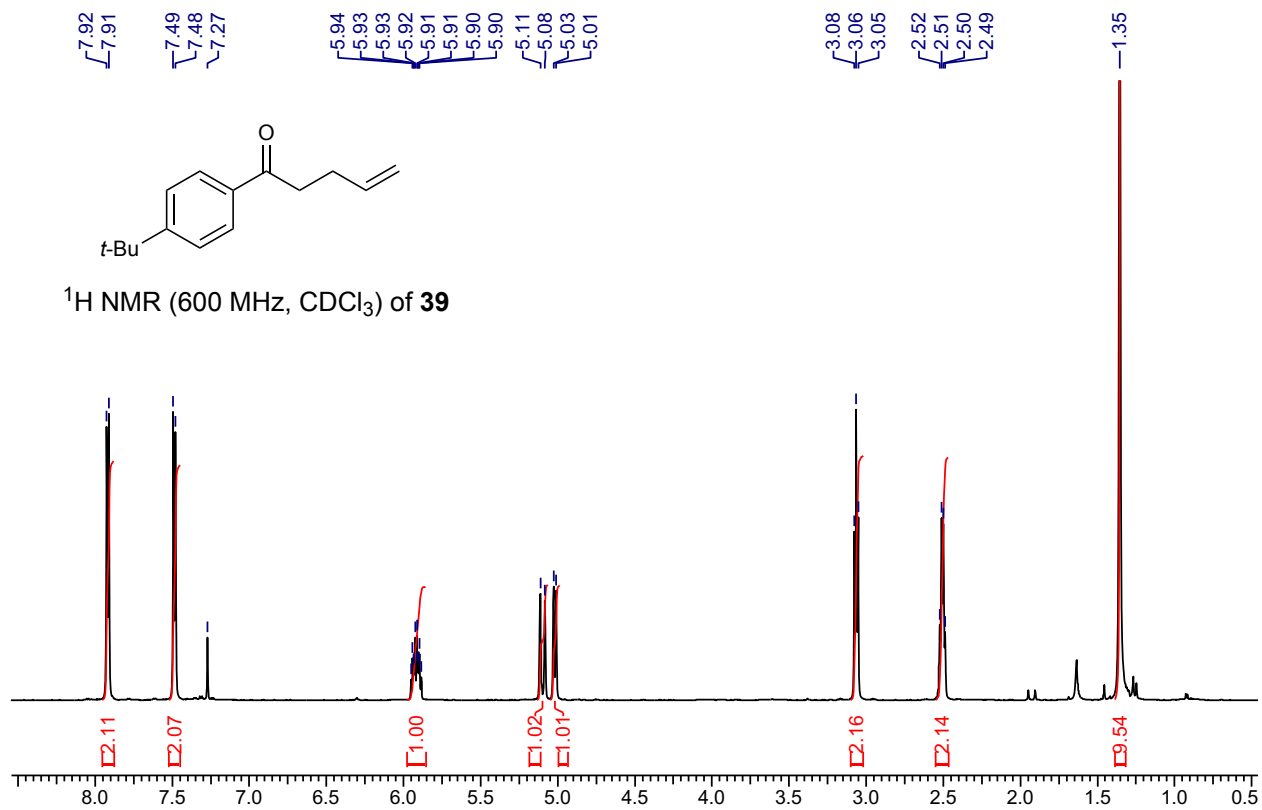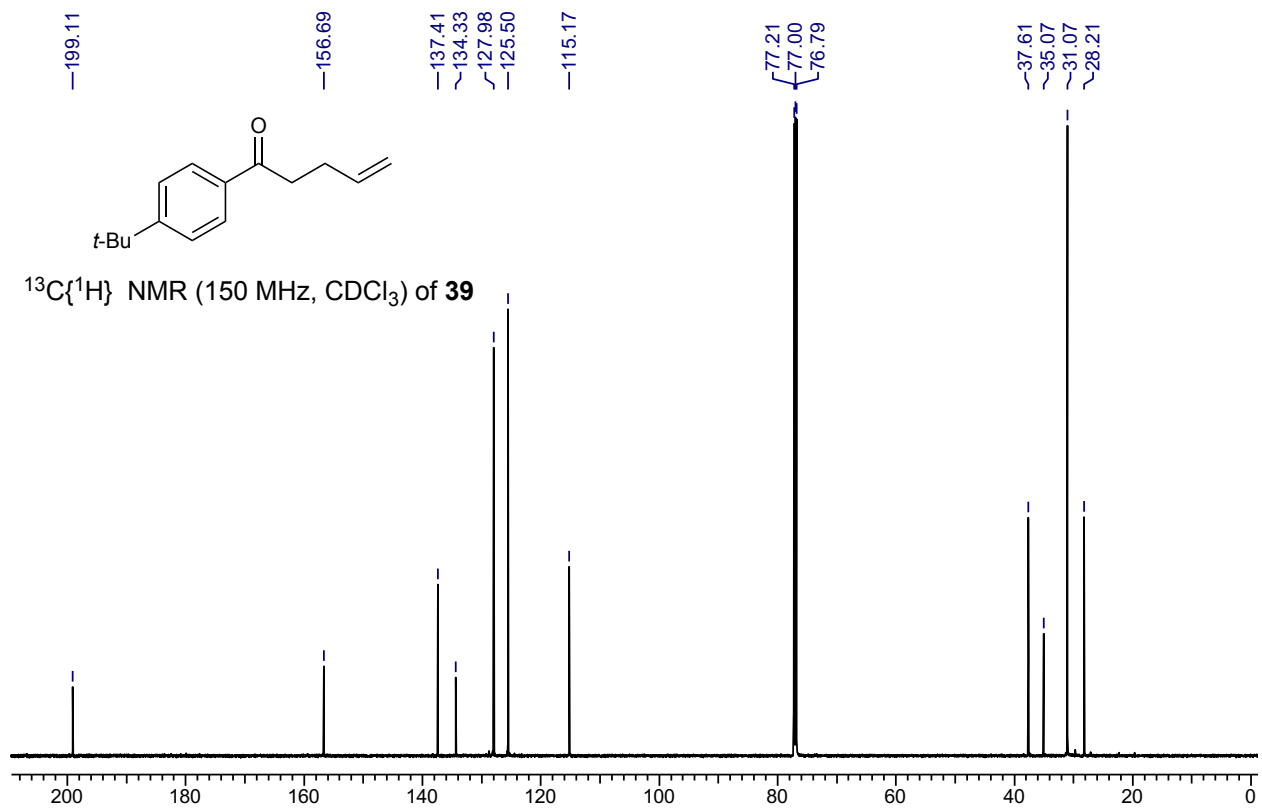



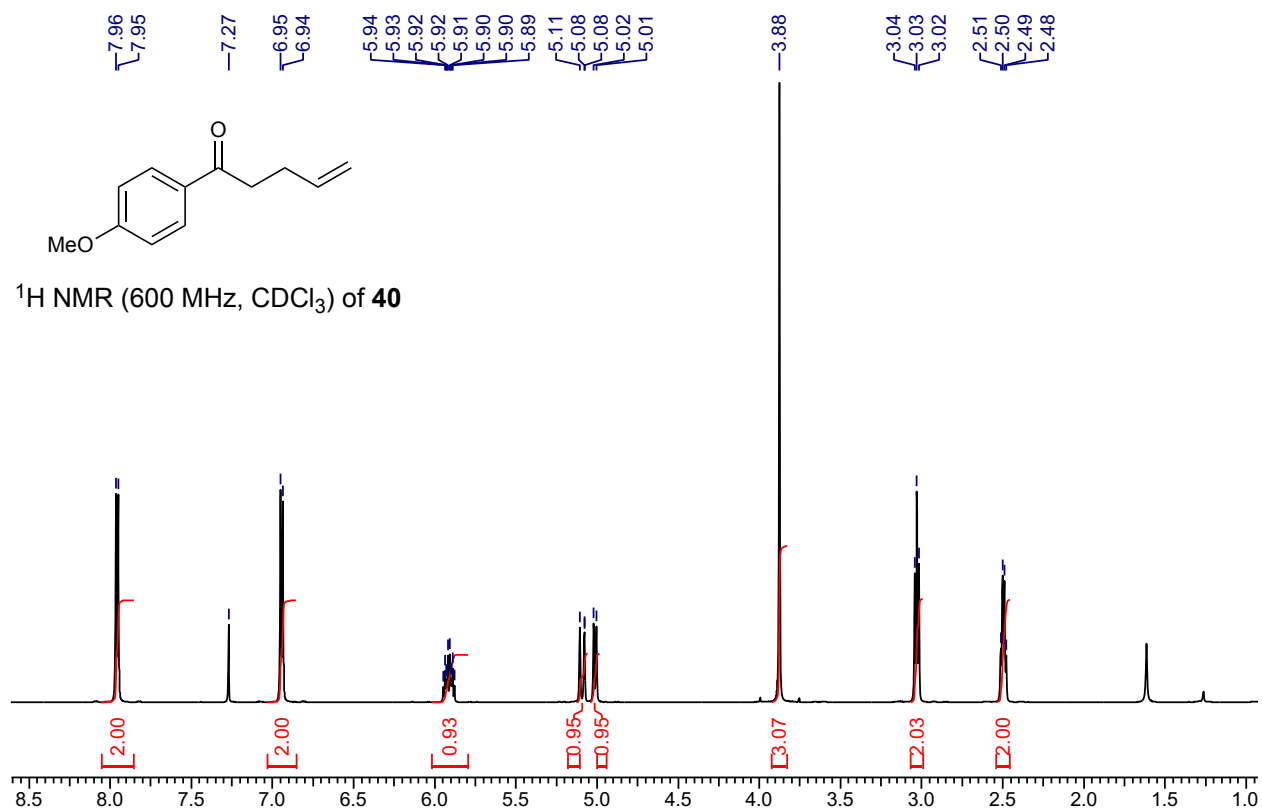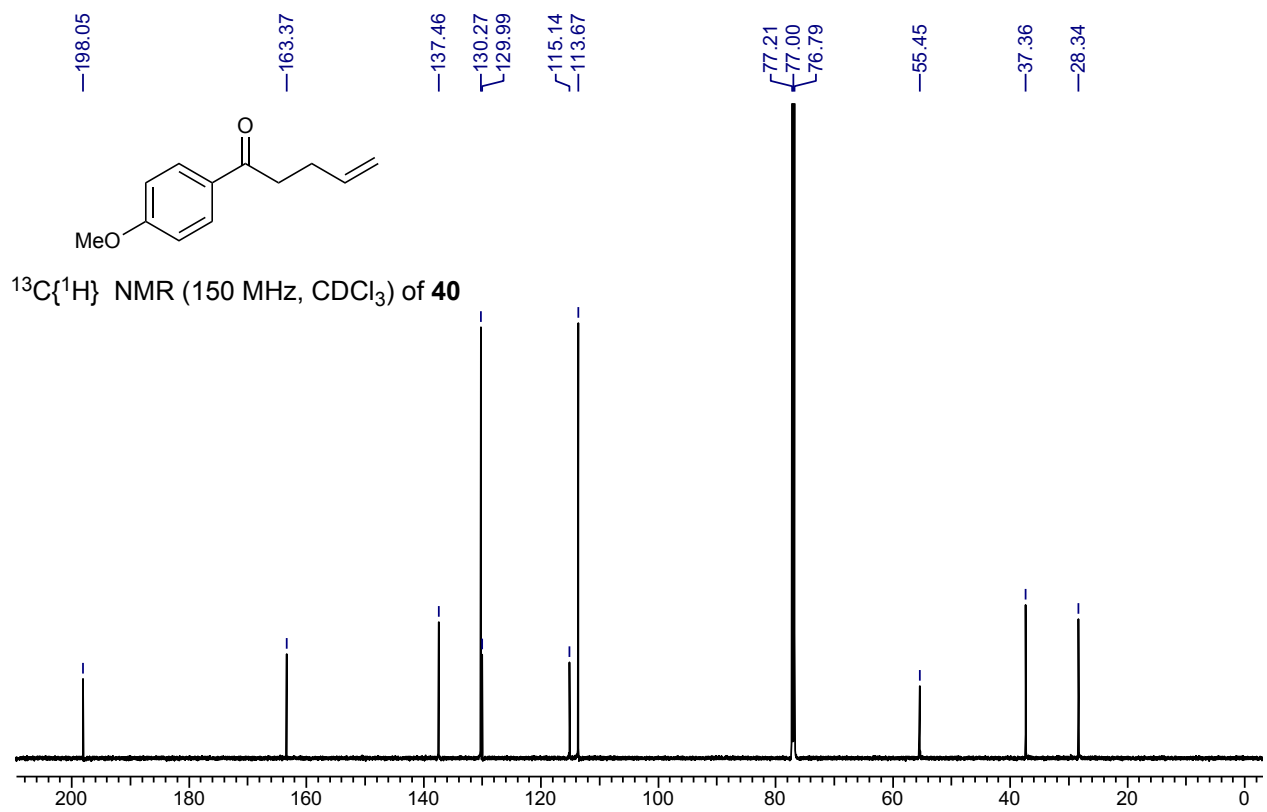

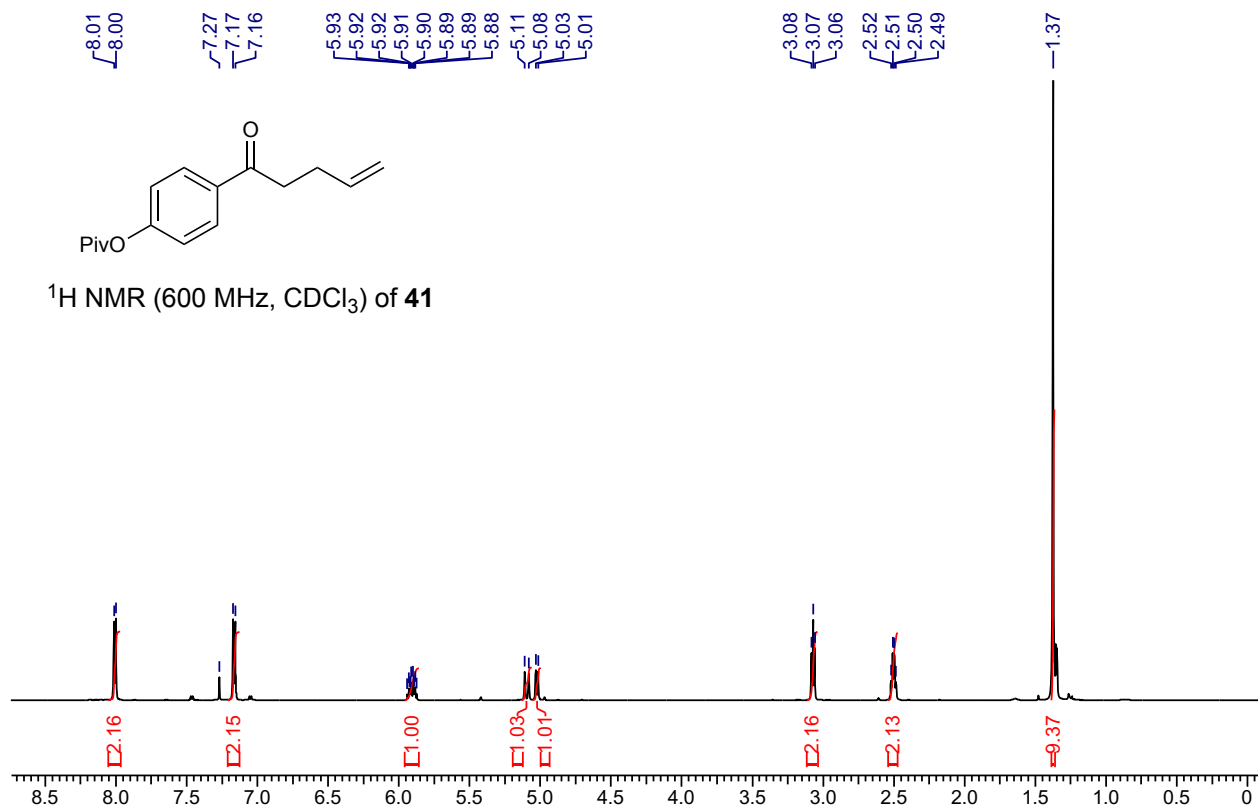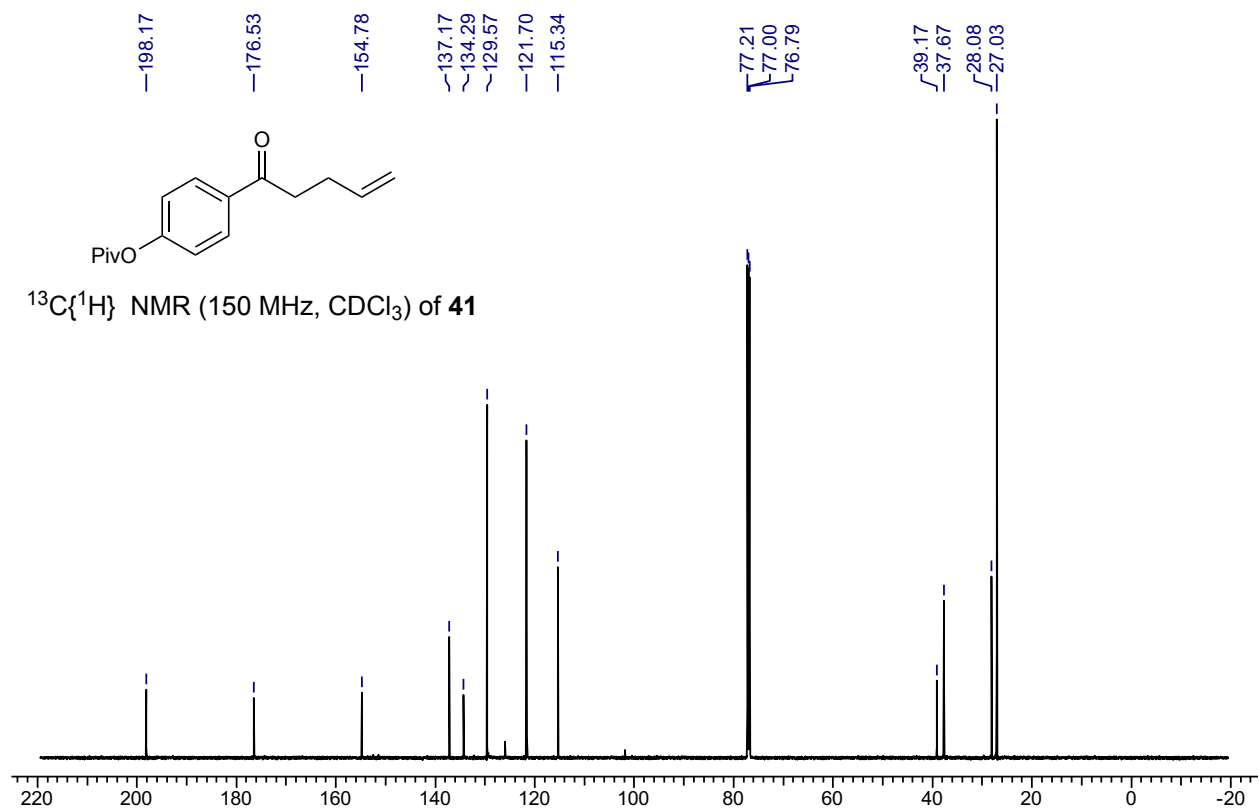

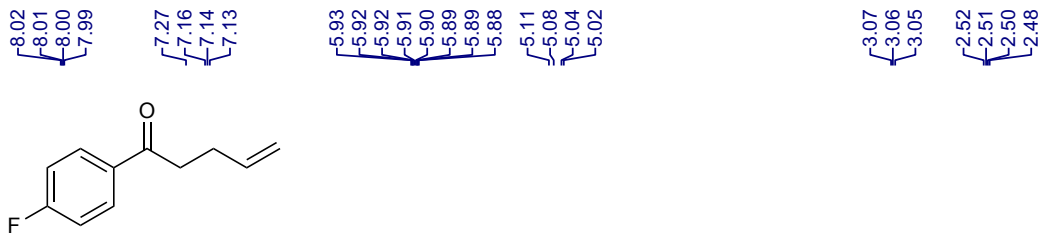

<sup>1</sup>H NMR (600 MHz, CDCl<sub>3</sub>) of 42

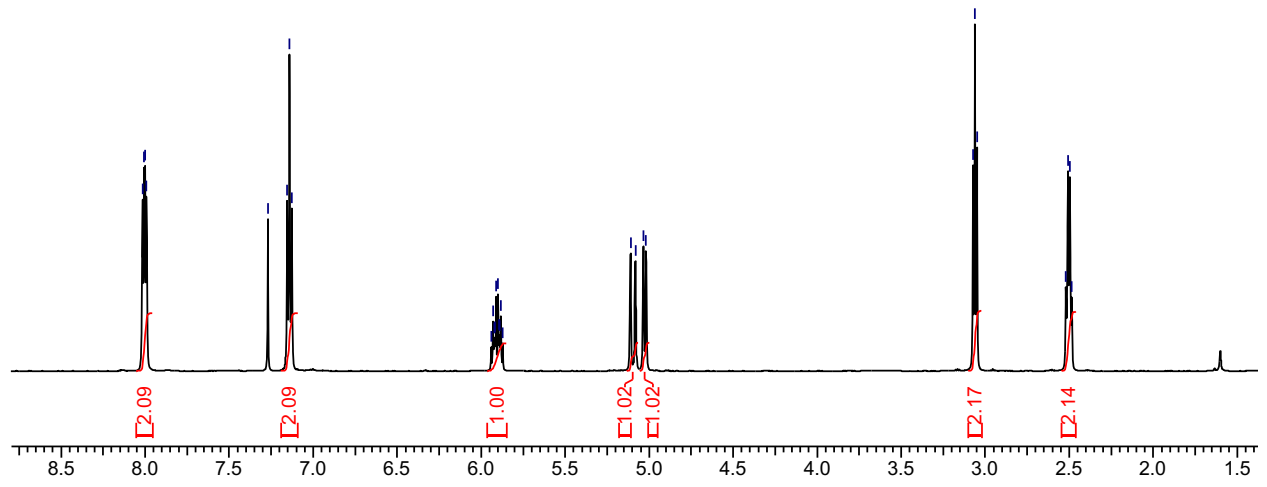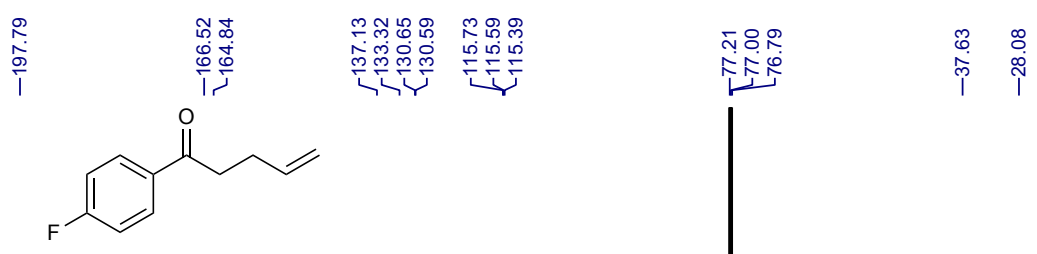

<sup>13</sup>C{<sup>1</sup>H} NMR (150 MHz, CDCl<sub>3</sub>) of 42

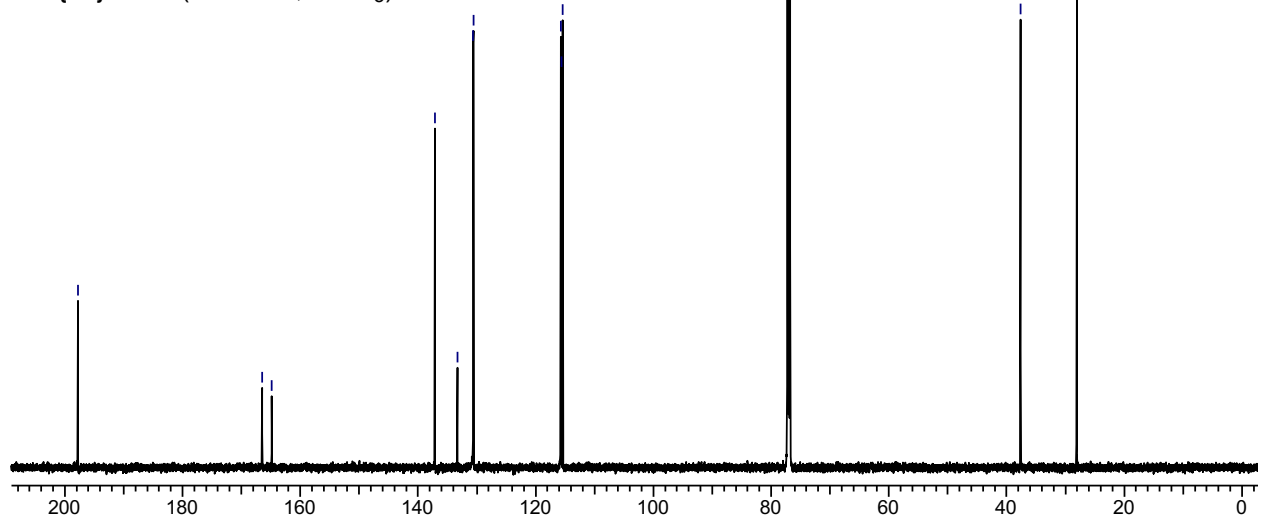

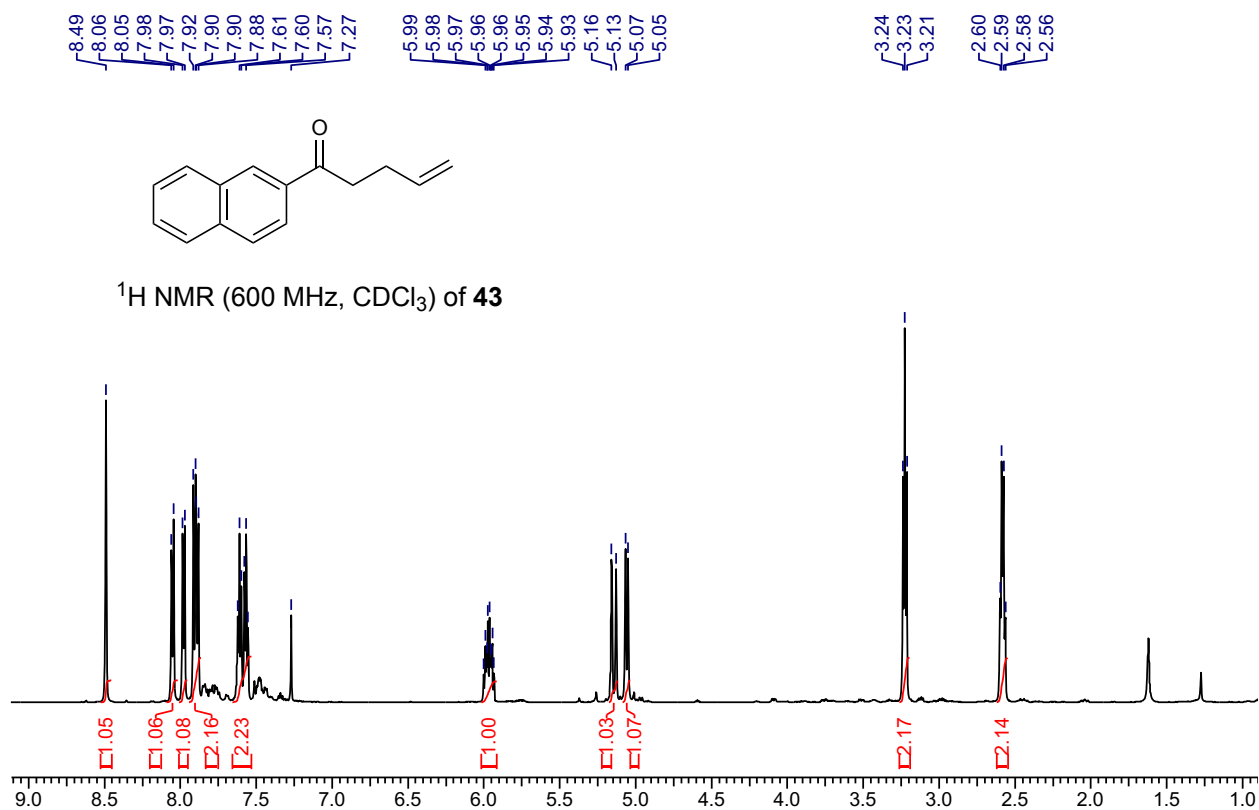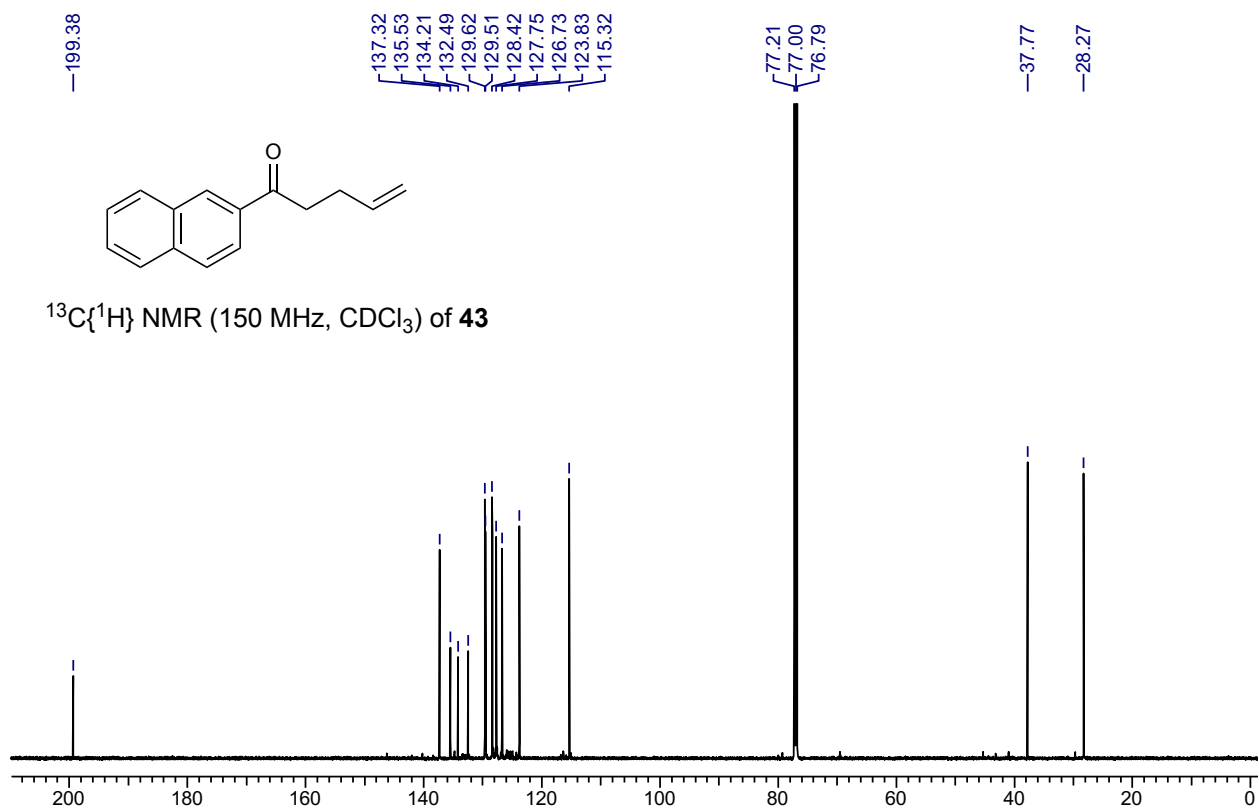

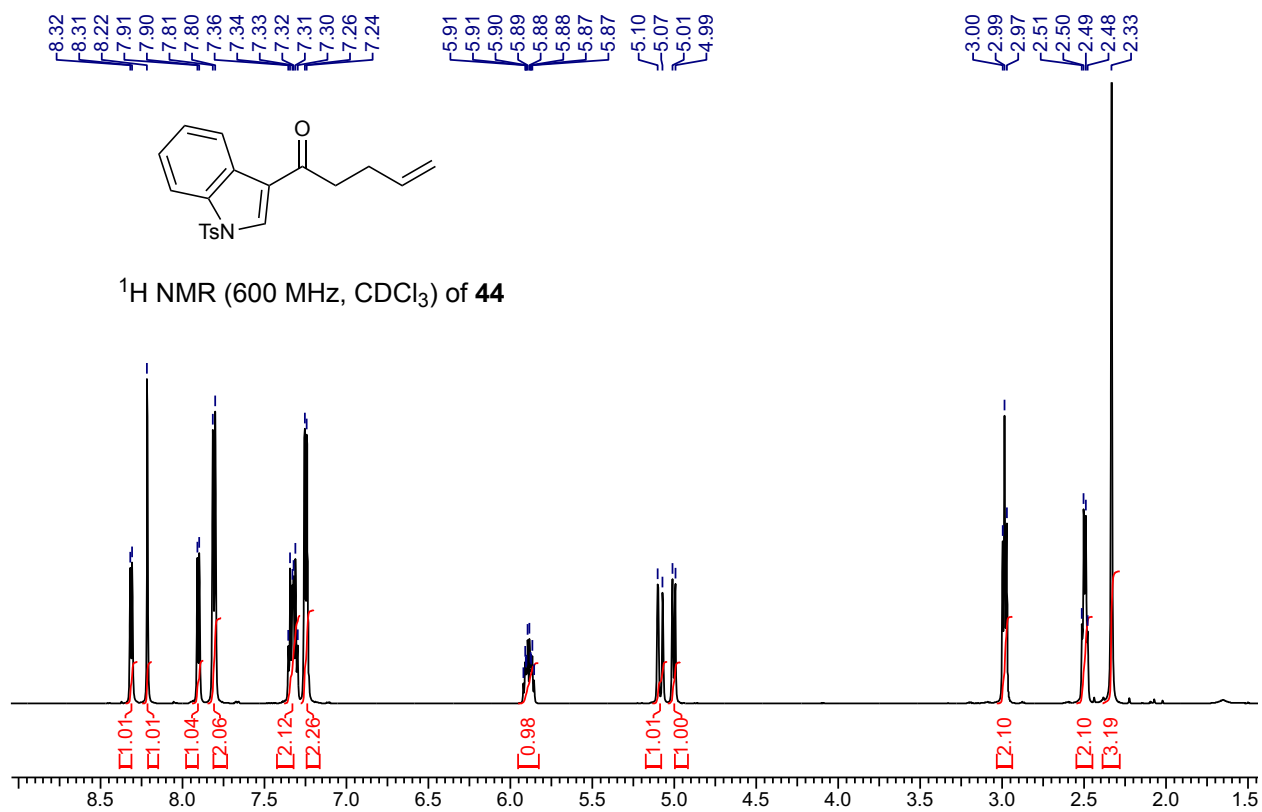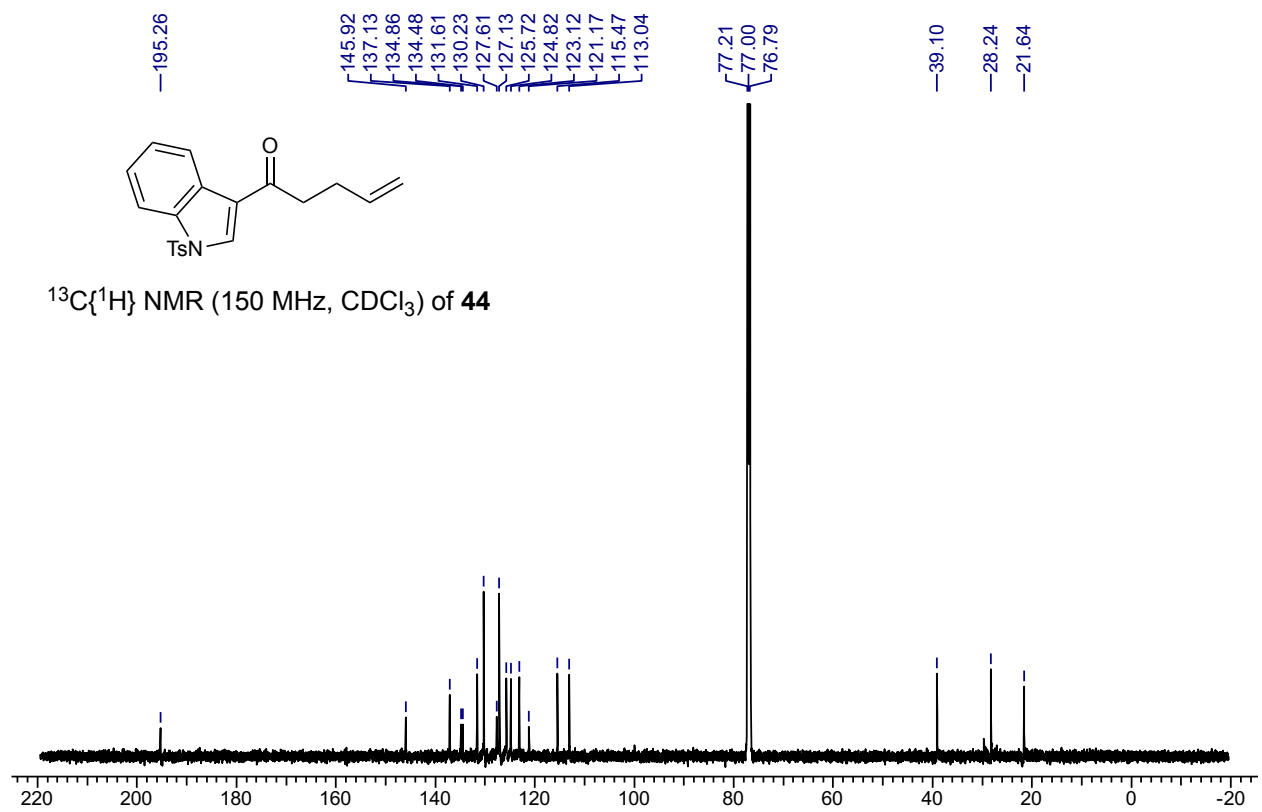

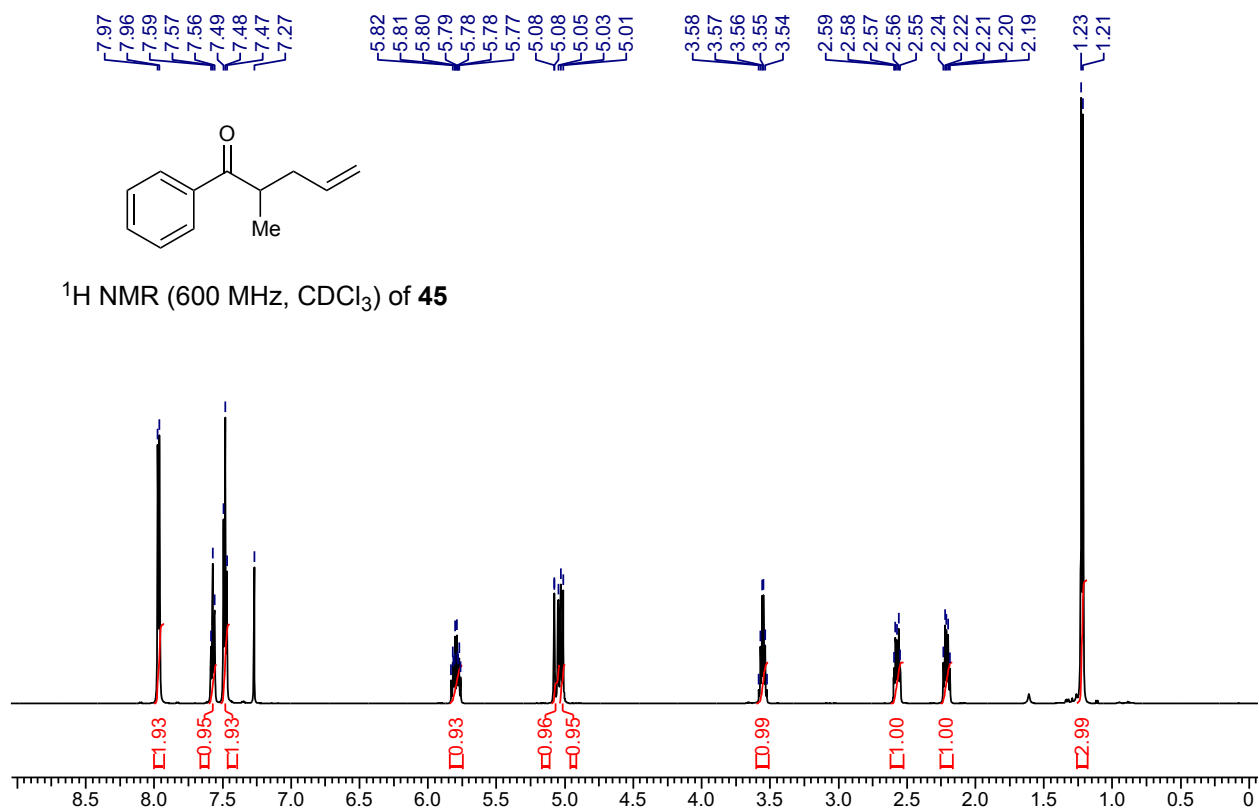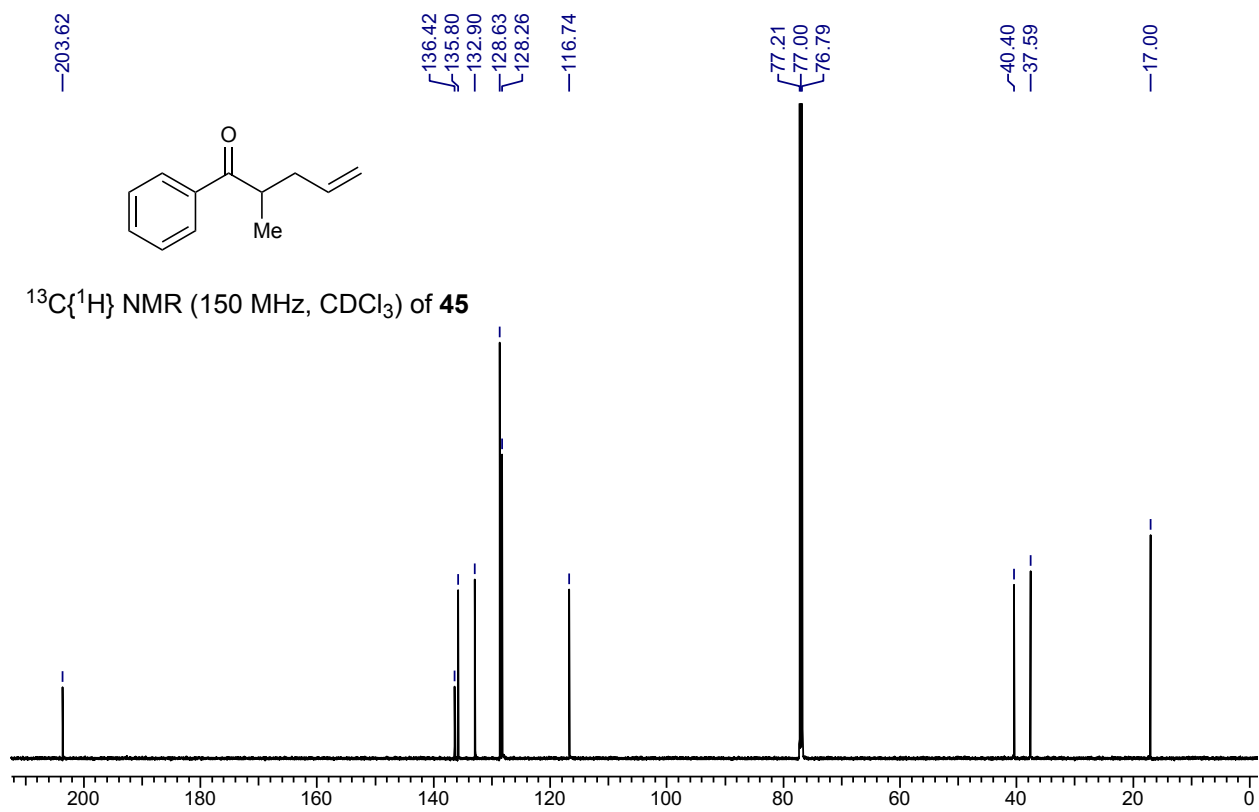

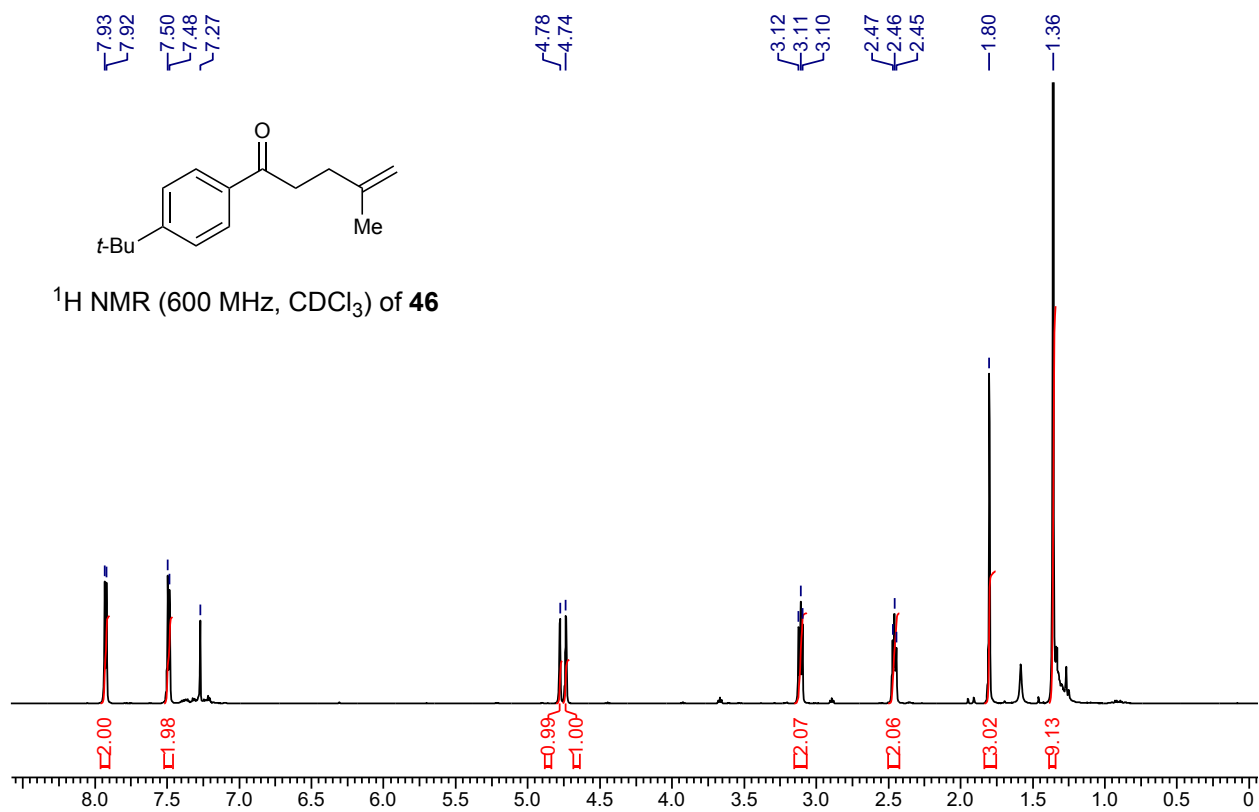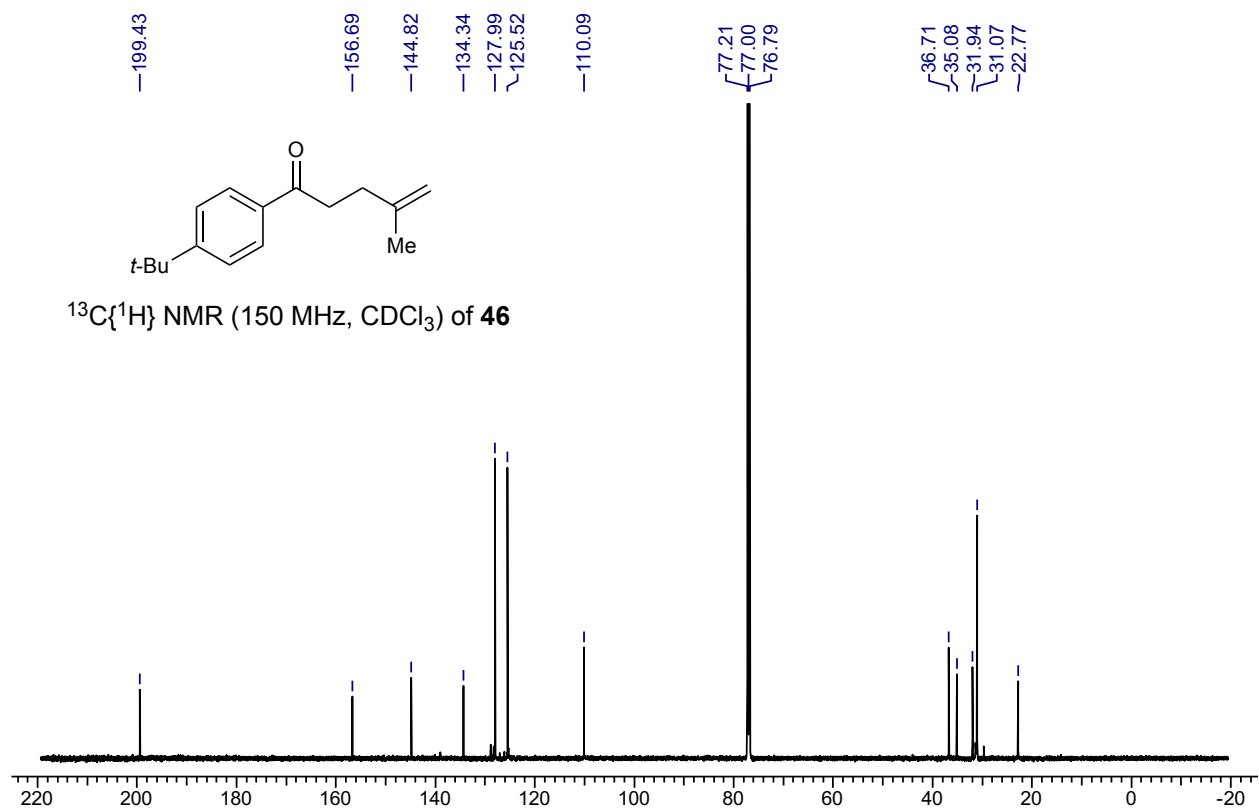

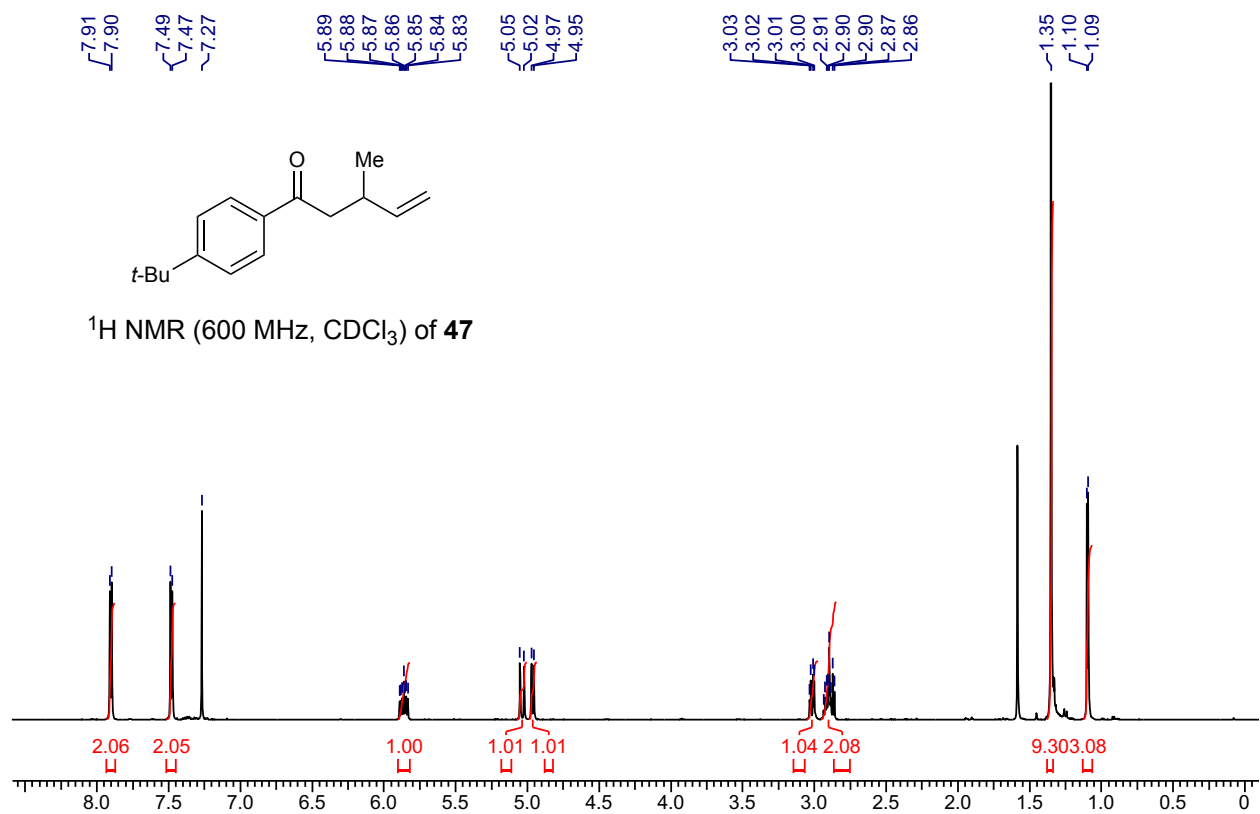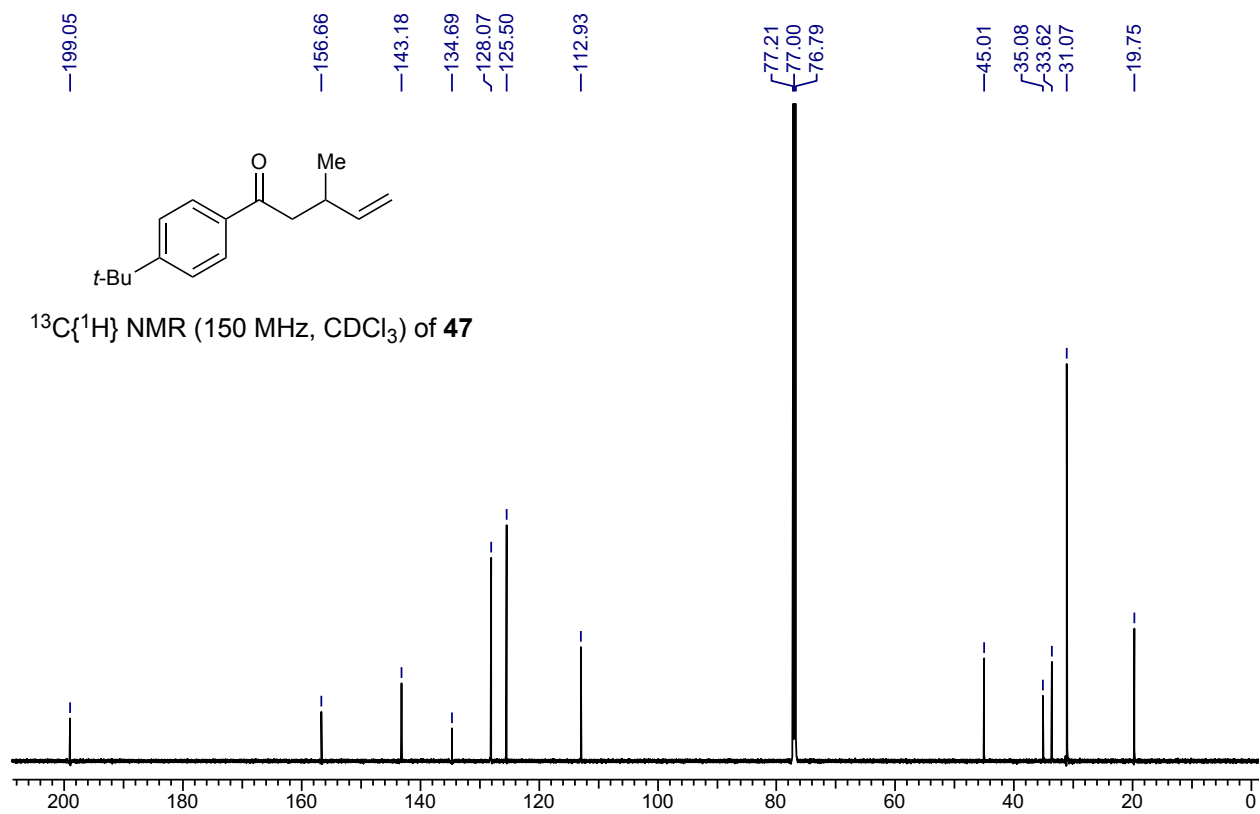



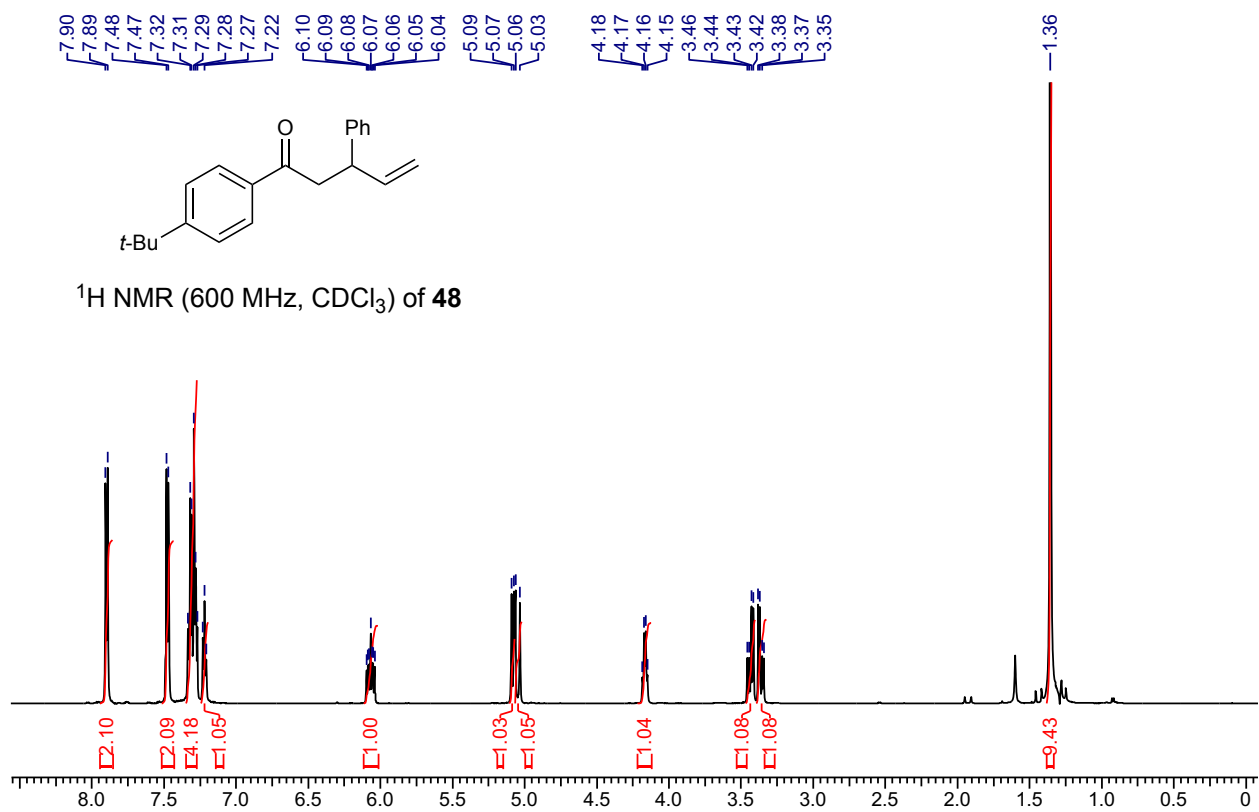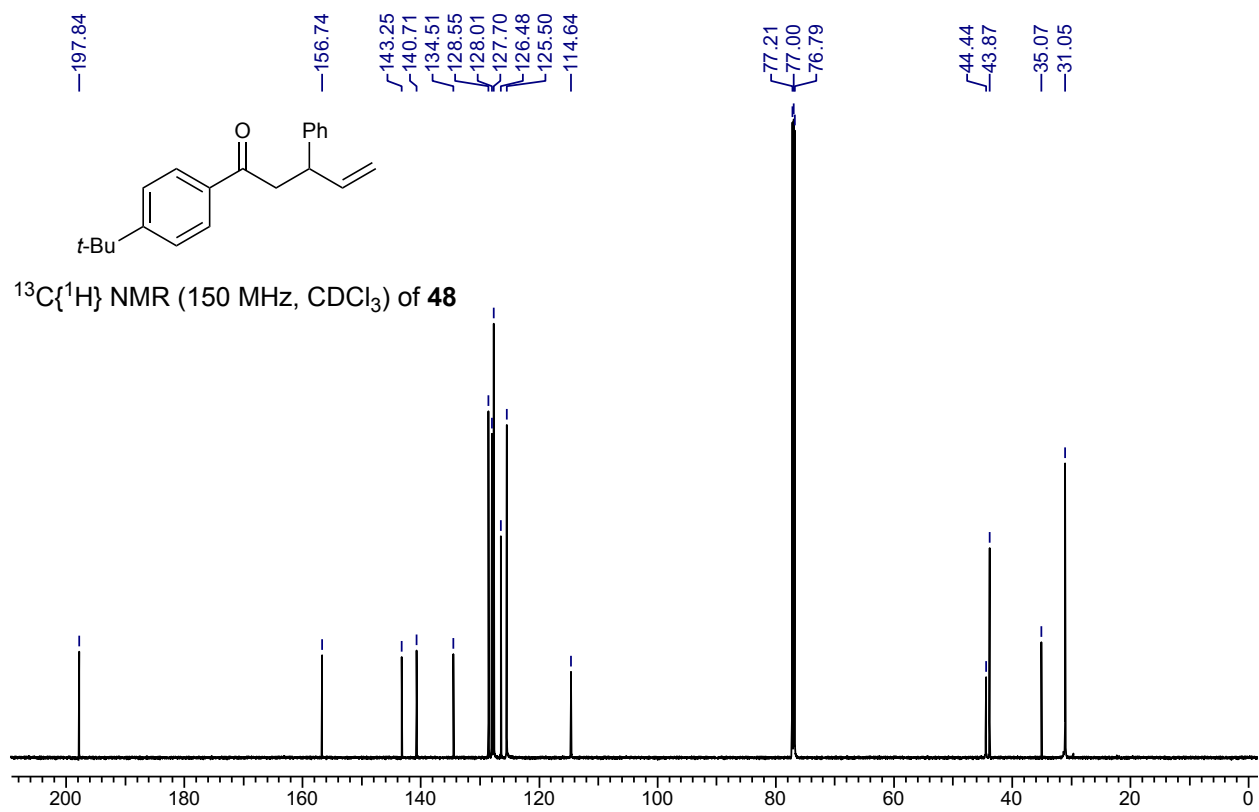

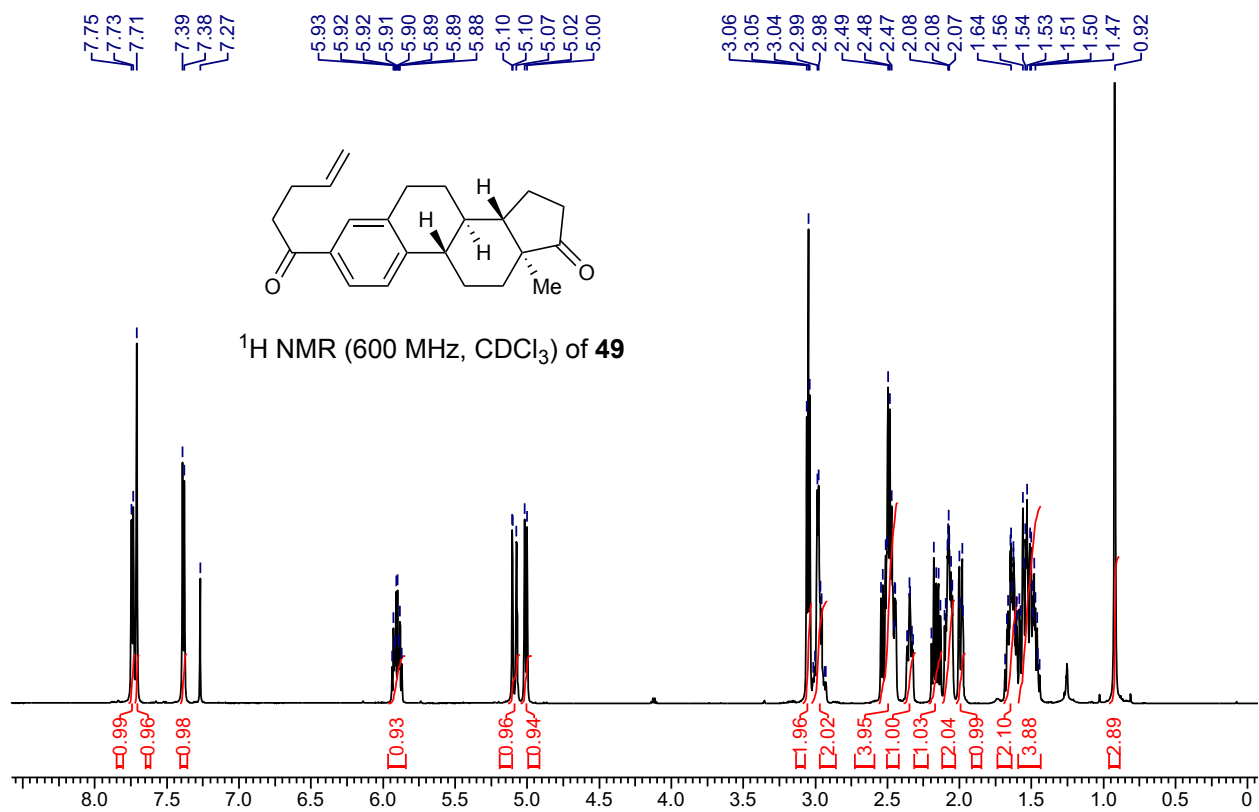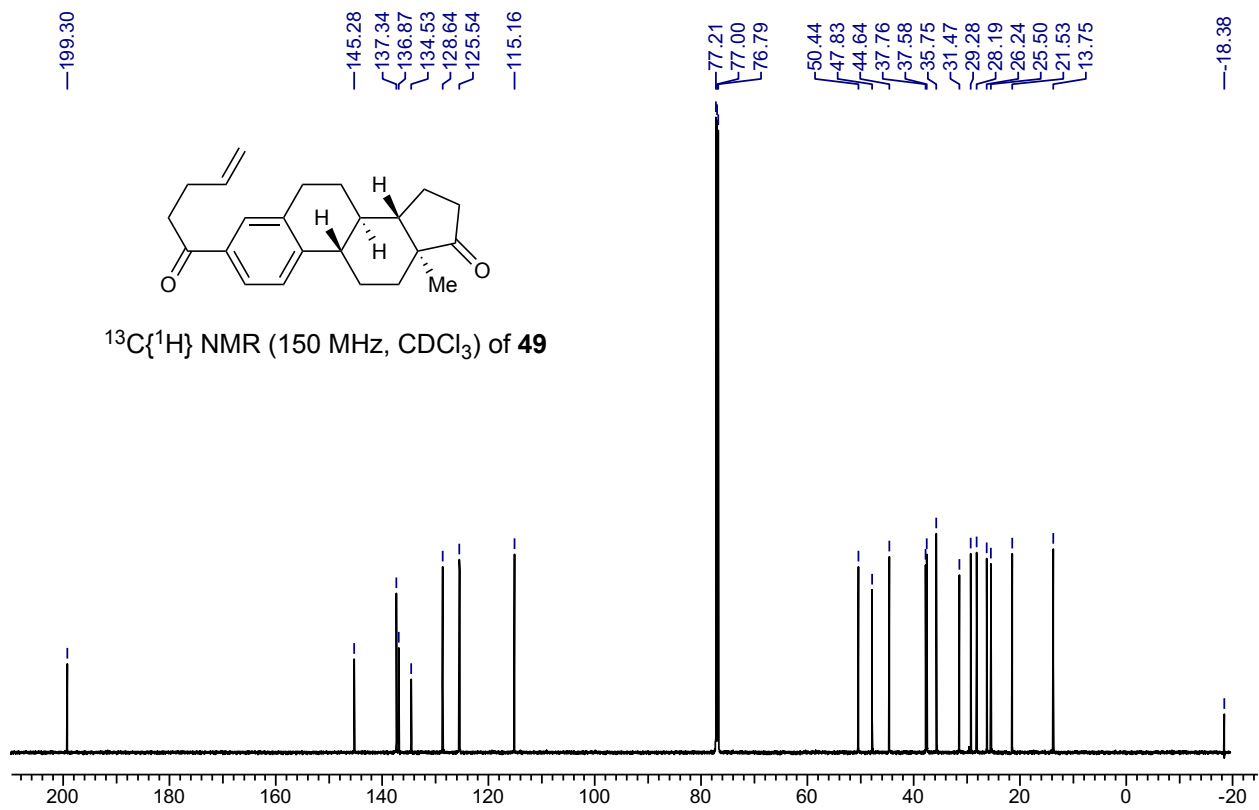

Supplement: NIHMS1812161-supplement-Supporting_Information.pdf [file NIHMS1812161-supplement-Supporting_Information.pdf]
